# Supplementary material for: Modular access to diarylmethyl sulfonamides via visible light-promoted cross-coupling reactions
Source: Royal Society of Chemistry journal article supplement (doi:10.1039/d4cc02571g), 2024-01-01

## Modular Access to Diarylmethyl Sulfonamides via Visible Light-Promoted Cross-Coupling Reactions

Yu-Tong Mei,<sup>a</sup> Hui Zhang,<sup>a</sup> Yu Jiang,<sup>a</sup> Yu-Jia Gu,<sup>a</sup> Jiang-Lai Deng,<sup>a</sup> Dan Yang,<sup>a\*</sup>  
Lin-Hai Jing,<sup>a\*</sup> Ming-Song Shi<sup>b\*</sup>

<sup>a</sup>Chemical Synthesis and Pollution Control Key Laboratory of Sichuan Province, College of Chemistry and Chemical Engineering, China West Normal University, Nanchong 637002, China

<sup>b</sup>NHC Key Laboratory of Nuclear Technology Medical Transformation, Mianyang Central Hospital, School of Medicine, University of Electronic Science and Technology of China, Mianyang 621099, China

Email: [danyangchem@mail.nankai.edu.cn](mailto:danyangchem@mail.nankai.edu.cn), [danyang@cwnu.edu.cn](mailto:danyang@cwnu.edu.cn), [jlhxg@cwnu.edu.cn](mailto:jlhxg@cwnu.edu.cn);  
shims90@sc-mch.cn

|                                                                           |     |
|---------------------------------------------------------------------------|-----|
| (A) General Information.....                                              | S2  |
| (B) General procedure for the synthesis of <i>p</i> -QMs .....            | S3  |
| (C) Optimization of the reaction conditions.....                          | S4  |
| (D) General procedure for the synthesis of diarylmethyl sulfonamides..... | S7  |
| (E) Synthetic applications.....                                           | S14 |
| (F) Radical trapping experiment with TEMPO.....                           | S14 |
| (G) Stern-Volmer fluorescence quenching experiments.....                  | S15 |
| (H) Unsuccessful examples .....                                           | S18 |
| (I) NMR spectra of new compounds.....                                     | S19 |

### (A) General Information

All reactions and manipulations which are sensitive to moisture or air were performed under inert atmosphere of argon. All chemicals were purchased from J&K, Acros and Aldrich, and were used as received. Anhydrous  $\text{CH}_2\text{Cl}_2$ , EA, THF, DME, DMSO, DMF and MeCN were freshly distilled from calcium hydride.  $^1\text{H}$  NMR,  $^{13}\text{C}$  NMR and  $^{19}\text{F}$  NMR spectra were recorded on a Bruker AVANCE 400 and chemical shifts are reported in  $\delta$  (ppm) referenced to residual undeuterated solvent signal for  $^1\text{H}$  NMR (7.26 ppm) and  $^{13}\text{C}$  NMR (77.00 ppm). The following abbreviations were used to designate chemical shift multiplicities: s = singlet, d = doublet, t = triplet, q = quartet, m = multiplet. All first-order splitting patterns were assigned on the basis of the appearance of the multiplet. HRMS spectra were recorded on a Waters Acquity UPLC/Xevo TQD-MS-MS quadrupole mass spectrometer. The light source for the photocatalytic reaction is manufactured by GeAo chemistry with a power of 40 W, a broad band source (450–465 nm). A fan was used to maintain the reaction temperature at room temperature (about 25–30 °C). The reactions were carried out in a borosilicate glass vessel and the distance from the light source to the irradiation vessel is about 1 cm.

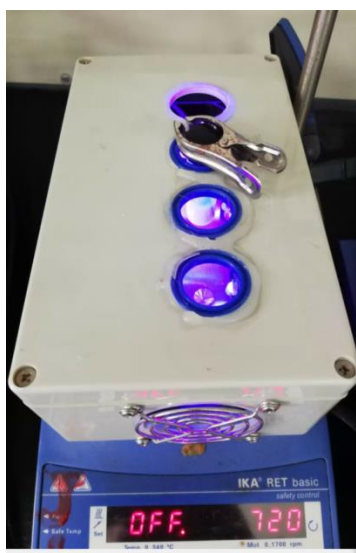

Photoreactor (GeAo) (small scale)

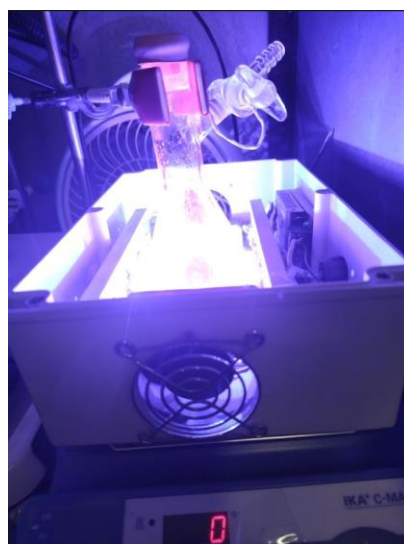

Photoreactor (GeAo) (large scale)

**(B) General procedure for the synthesis of *p*-QMs 1.**

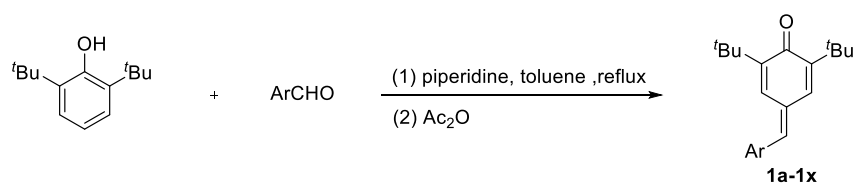

Substrates **1a-1x** were synthesized according to the reported literature.<sup>1-3</sup> In a Dean-Stark apparatus, to a mixture solution of 2,6-di-*tert*-butylphenol (5.0 mmol, 1.0 eq.) and the corresponding aromatic aldehyde (5.5 mmol, 1.1 eq.) in 30 mL toluene was heated with an oil bath to reflux. Then piperidine (10.0 mmol, 2.0 eq.) was added dropwise and the reaction mixture was continued to reflux for 24 h. after cooling the reaction mixture just below the boiling point of toluene, acetic anhydride (10.0 mmol, 2.0 eq.) was added and the reaction mixture was stirred for another 1 h at the same temperature. Then the reaction mixture was poured into ice water (100 mL) and extracted with ethyl acetate (20 mL x 3). The combined organic phases were dried over anhydrous Na<sub>2</sub>SO<sub>4</sub>, filtered, and concentrated under reduced pressure. The residue were purified by flash column chromatography (petroleum ether/ethyl acetate) affording the desired products *p*-QMs **1a-1x**.

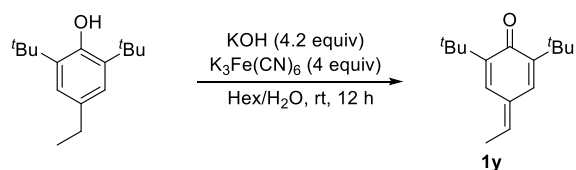

Substrate **1y** was synthesized according to the reported literature.<sup>4</sup> To a solution of 2,6-di-*tert*-butyl-4-ethylphenol (2.4 g, 10 mmol) in hexane (30 mL) was added a solution of K<sub>3</sub>Fe(CN)<sub>6</sub> (13.2 g, 40.0 mmol) and KOH (2.4 g, 42.0 mmol) in water (30 mL) under argon atmosphere. The reaction mixture was stirred at room temperature for 6 h. The combined organic layer was washed with saturated brine and extracted with ethyl acetate (20 mL x 3), and dried over anhydrous Na<sub>2</sub>SO<sub>4</sub>, filtered, and concentrated under reduced pressure. Then the product **1y** was obtained by recrystallization from CH<sub>2</sub>Cl<sub>2</sub> and hexane (1.4 g, 59% yield, yellow solid).

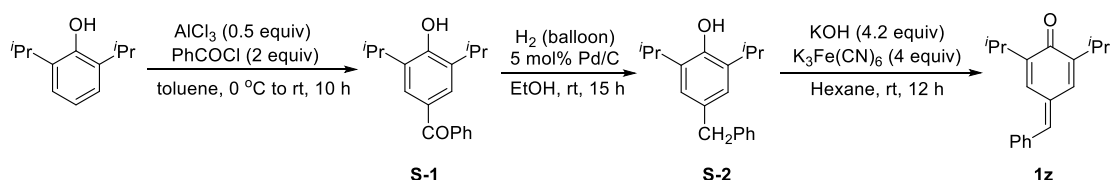

Substrate **1z** was synthesized according to the reported literature.<sup>5</sup> To a solution of propofol (1.8 g, 10.0 mmol) in anhydrous toluene in ice-water bath was added benzoyl chloride (2.6 g, 18.0 mmol). Then AlCl<sub>3</sub> (535.0 mg, 4.0 mmol) was added in three batches. And the reaction mixture was raised to room temperature and stirred overnight, after complete consumption of starting

material, solvent was concentrated under reduced pressure and the residue were purified by flash column chromatography to afford product **S-1**.

To a solution of **S-1** in anhydrous ethanol (30 mL) was added 10% Pd/C (534 mg, 5 mol%), and then stirred at room temperature for 5 h under hydrogen atmosphere (balloon). Filtered through a pad of celite, and solvent was concentrated under reduced pressure and the residue was purified by flash column chromatography to afford product **S-2**.

To a solution of **S-2** in hexane (30 mL) was added  $K_3Fe(CN)_6$  (13.2 g, 40.0 mmol) and KOH (2.4 g, 42.0 mmol) sequently under an argon atmosphere. The reaction mixture was stirred at room temperature for 1 h. The combined organic layer was washed with saturated brine and extracted with ethyl acetate (20 mL x 3), and dried over anhydrous  $Na_2SO_4$ , filtered, and concentrated under reduced pressure and the residue was purified by flash column chromatography to afford product **1z** (1.8 g, 67% yield for three steps).

### (C) Optimization of the reaction conditions.

**Table S1. Photocatalyst screening<sup>a</sup>**

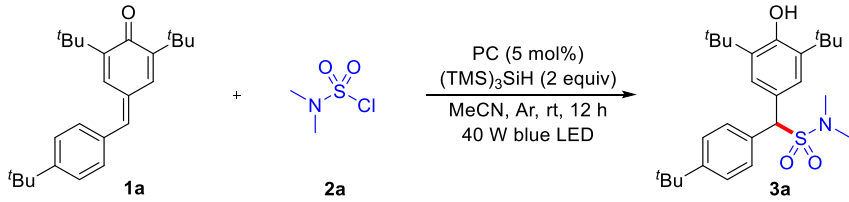

| Entry | PC                              | Yield (%) <sup>b</sup> |
|-------|---------------------------------|------------------------|
| 1     | Eosin Y                         | 41                     |
| 2     | Rose Bengal                     | 46                     |
| 3     | Rhodamine 6G                    | 76                     |
| 4     | 4CzIPN                          | 50                     |
| 5     | $Ir[dF(CF_3)ppy]_2(dtbbpy)PF_6$ | 35                     |
| 6     | $[Ru(bpy)_3](PF_6)_2$           | 0                      |

<sup>a</sup>**1a** (0.1 mmol), **2a** (0.2 mmol), PC (5 mol%),  $(TMS)_3SiH$  (2 equiv), MeCN (1 mL), 40 W blue LED (450-465 nm), Ar, rt (25-30 °C), 12 h. <sup>b</sup>Isolated yield.

**Table S2. Solvent screening<sup>a</sup>**

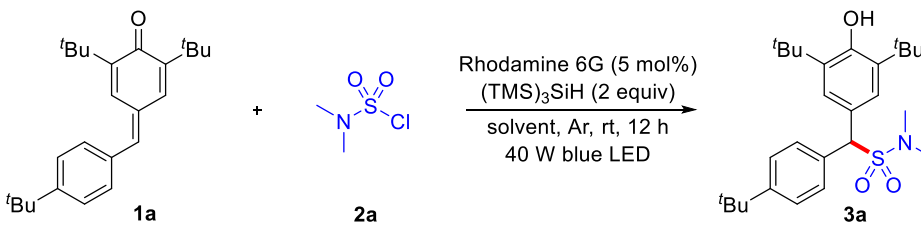

| Entry | Solvent    | Yield (%) <sup>b</sup> |
|-------|------------|------------------------|
| 1     | MeCN       | 76                     |
| 2     | $CH_2Cl_2$ | 15                     |

|   |      |    |
|---|------|----|
| 3 | THF  | 64 |
| 4 | EA   | 43 |
| 5 | DME  | 58 |
| 6 | DMF  | 20 |
| 7 | DMSO | 0  |

<sup>a</sup>**1a** (0.1 mmol), **2a** (0.2 mmol), Rhodamine 6G (5 mol%), (TMS)<sub>3</sub>SiH (2 equiv), Solvent (1 mL), 40 W blue LED (450-465 nm), Ar, rt (25-30 °C), 12 h. <sup>b</sup>Isolated yield.

**Table S3. Halogen atom transfer (HAT) reagent screening<sup>a</sup>**

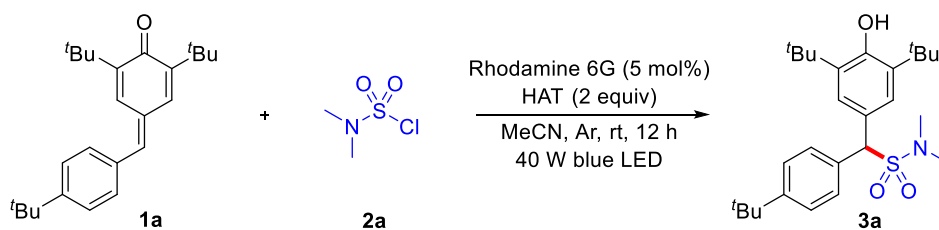

| Entry | HAT (2 equiv)                      | Yield (%) <sup>b</sup> |
|-------|------------------------------------|------------------------|
| 1     | (TMS) <sub>3</sub> SiH             | 76                     |
| 2     | Et <sub>3</sub> SiH                | 0                      |
| 3     | Me <sub>2</sub> EtSiH              | 0                      |
| 4     | <sup>i</sup> Pr <sub>3</sub> SiH   | 0                      |
| 5     | <sup>t</sup> BuMe <sub>2</sub> SiH | 0                      |
| 6     | Bn <sub>3</sub> SiH                | 18                     |
| 7     | PhMe <sub>2</sub> SiH              | 17                     |
| 8     | <sup>i</sup> PrNEt                 | 0                      |
| 9     | Et <sub>3</sub> N                  | 0                      |
| 10    | Py•BH <sub>3</sub>                 | 11                     |
| 11    | BPh <sub>4</sub> Na                | 0                      |

<sup>a</sup>**1a** (0.1 mmol), **2a** (0.2 mmol), Rhodamine 6G (5 mol%), HAT (2 equiv), MeCN (1 mL), 40 W blue LED (450-465 nm), Ar, rt (25-30 °C), 12 h. <sup>b</sup>Isolated yield.

**Table S4. The equivalent of halogen atom transfer (HAT) reagent screening<sup>a</sup>**

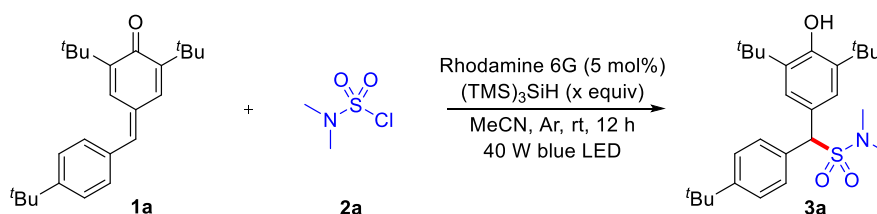

| Entry | x (equiv) | Yield (%) <sup>b</sup> |
|-------|-----------|------------------------|
| 1     | 2         | 76                     |
| 2     | 3         | 78                     |
| 3     | 5         | 66                     |

<sup>a</sup>**1a** (0.1 mmol), **2a** (0.2 mmol), Rhodamine 6G (5 mol%), (TMS)<sub>3</sub>SiH (x equiv), MeCN (1 mL), 40 W blue LED (450-465 nm), Ar, rt (25-30 °C). <sup>b</sup>Isolated yield.

**Table S5. Reaction time screening<sup>a</sup>**

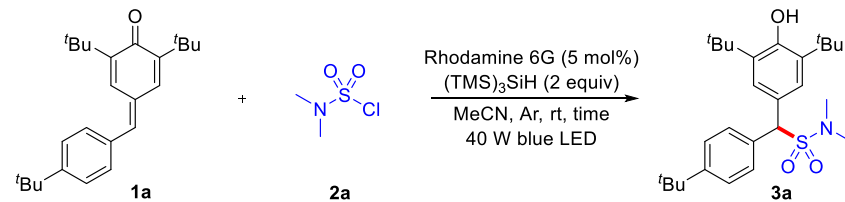

| Entry | Time (h) | Yield (%) <sup>b</sup> |
|-------|----------|------------------------|
| 1     | 6        | 70                     |
| 2     | 12       | 76                     |
| 3     | 24       | 58                     |
| 4     | 36       | 31                     |
| 5     | 48       | 32                     |

<sup>a</sup>**1a** (0.1 mmol), **2a** (0.2 mmol), Rhodamine 6G (5 mol%), (TMS)<sub>3</sub>SiH (2 equiv), MeCN (1 mL), 40 W blue LED (450-465 nm), Ar, rt (25-30 °C). <sup>b</sup>Isolated yield.

**Table S6. Temperature screening<sup>a</sup>**

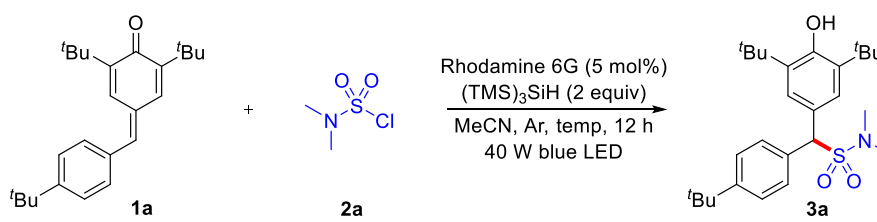

| Entry | Temp (°C)  | Yield (%) <sup>b</sup> |
|-------|------------|------------------------|
| 1     | 0          | 47                     |
| 2     | 10         | 65                     |
| 3     | rt (25-30) | 76                     |
| 4     | 50         | 53                     |

<sup>a</sup>**1a** (0.1 mmol), **2a** (0.2 mmol), Rhodamine 6G (5 mol%), (TMS)<sub>3</sub>SiH (2 equiv), MeCN (1 mL), 40 W blue LED (450-465 nm), Ar. <sup>b</sup>Isolated yield.

**Table S7. Control experiments<sup>a</sup>**

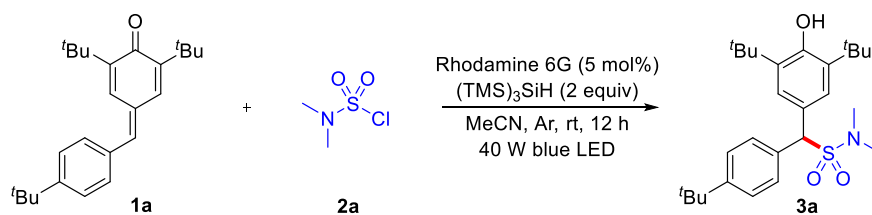

| Entry | Control experiments            | Yield (%) <sup>b</sup> |
|-------|--------------------------------|------------------------|
| 1     | none                           | 76                     |
| 2     | Without PC                     | 0                      |
| 3     | Without (TMS) <sub>3</sub> SiH | 0                      |
| 4     | Air                            | 0                      |
| 5     | Without light                  | 0                      |

<sup>a</sup>**1a** (0.1 mmol), **2a** (0.2 mmol), Rhodamine 6G (5 mol%), (TMS)<sub>3</sub>SiH (2 equiv), MeCN (1 mL), 40 W blue LED (450–465 nm), Ar, rt (25–30 °C). 12 h. <sup>b</sup>Isolated yield.

#### (D) General procedure for synthesis of diarylmethyl sulfonamides

To an 8 mL vial equipped with a magnetic stir bar was added **1** (0.1 mmol), sulfamoyl chlorides (0.2 mmol), (TMS)<sub>3</sub>SiH (49.8 mg, 0.2 mmol), Rhodamine 6G (2.4 mg, 5.0 mol%) and MeCN (1 mL) under argon atmosphere and sealed with PTFE cap. Then the reaction mixture was stirred upon 40 W blue LED (450–465 nm) at room temperature for 12 h. The solvent was concentrated in vacuo and the residue was purified by a column chromatography on silica gel with petroleum ether/ethyl acetate as eluent to provide the desired product **3**.

#### 1-(4-(*tert*-butyl)phenyl)-1-(3,5-di-*tert*-butyl-4-hydroxyphenyl)-*N,N*-dimethylmethanesulfonamide (**3a**)

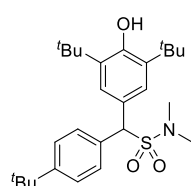

White solid, mp 135–136 °C, 34.9 mg, 76% yield.  $R_f$  = 0.3 (petroleum ether/ethyl acetate = 8:1). <sup>1</sup>H NMR (400 MHz, CDCl<sub>3</sub>) δ: 7.60 (d,  $J$  = 8.4 Hz, 2H), 7.43 (s, 2H), 7.40 (d,  $J$  = 8.4 Hz, 2H), 5.27 (s, 1H), 5.24 (s, 1H), 2.58 (s, 6H), 1.44 (s, 18H), 1.30 (s, 9H). <sup>13</sup>C NMR (101 MHz, CDCl<sub>3</sub>) δ: 154.0 (C), 151.3 (C), 136.0 (C), 131.8 (C), 129.1 (CH), 126.4 (CH), 125.7 (CH), 124.9 (C), 71.6 (CH), 37.8 (CH<sub>3</sub>), 34.5 (C), 34.4 (C), 31.2 (CH<sub>3</sub>), 30.2 (CH<sub>3</sub>). HRMS (ESI)  $m/z$ : [M+Na]<sup>+</sup> calcd for C<sub>27</sub>H<sub>41</sub>NO<sub>3</sub>SNa: 482.2699; Found: 482.2691.

#### 1-(3,5-di-*tert*-butyl-4-hydroxyphenyl)-*N,N*-dimethyl-1-phenylmethanesulfonamide (**3b**)

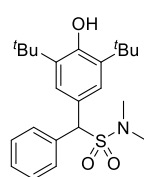

White solid, mp 172–173 °C, 32.6 mg, 81% yield.  $R_f$  = 0.3 (petroleum ether/ethyl acetate = 8:1). <sup>1</sup>H NMR (400 MHz, CDCl<sub>3</sub>) δ: 7.67 (d,  $J$  = 7.2 Hz, 1H), 7.43 (s, 2H), 7.41–7.33 (m, 3H), 5.28 (s, 1H), 5.27 (s, 1H), 2.59 (s, 6H), 1.44 (s, 18H). <sup>13</sup>C NMR (101 MHz, CDCl<sub>3</sub>) δ: 154.1 (C), 136.0 (C), 134.9 (C), 129.4 (CH), 128.7 (CH), 128.3 (CH), 126.3 (CH), 124.7 (C), 71.8 (CH), 37.8 (CH<sub>3</sub>), 34.4 (C), 30.2 (CH<sub>3</sub>). HRMS (ESI)  $m/z$ : [M+Na]<sup>+</sup> calcd for C<sub>23</sub>H<sub>33</sub>NO<sub>3</sub>SNa: 426.2073; Found: 426.2077.

#### 1-(3,5-di-*tert*-butyl-4-hydroxyphenyl)-*N,N*-dimethyl-1-(*p*-tolyl)methanesulfonamide (**3c**)

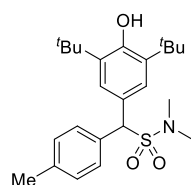

White solid, mp 157–158 °C, 32.1 mg, 77% yield.  $R_f$  = 0.35 (petroleum ether/ethyl acetate = 8:1). <sup>1</sup>H NMR (400 MHz, CDCl<sub>3</sub>) δ: 7.56 (d,  $J$  = 8.0 Hz, 2H), 7.43 (s, 2H), 7.19 (d,  $J$  = 8.0 Hz, 2H), 5.26 (s, 1H), 5.24 (s, 1H), 2.59 (s, 6H), 2.34 (s, 3H), 1.44 (s, 18H). <sup>13</sup>C NMR (101 MHz, CDCl<sub>3</sub>) δ: 154.0 (C), 138.1 (C), 136.0 (C), 131.9 (C), 129.4 (CH), 129.3 (CH), 126.3 (CH), 124.9 (C), 71.6 (CH), 37.9 (CH<sub>3</sub>), 34.4 (C), 30.2 (CH<sub>3</sub>), 21.1 (CH<sub>3</sub>). HRMS (ESI)  $m/z$ : [M+H]<sup>+</sup> calcd for C<sub>24</sub>H<sub>36</sub>NO<sub>3</sub>S: 418.2410; Found: 418.2406.

**1-([1,1'-biphenyl]-4-yl)-1-(3,5-di-*tert*-butyl-4-hydroxyphenyl)-*N,N*-dimethylmethanesulfonamide (3d)**

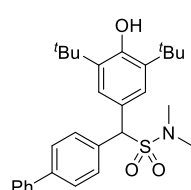

Yellow solid, mp 165–166 °C, 38.3 mg, 80% yield.  $R_f = 0.35$  (petroleum ether/ethyl acetate = 8:1).  $^1\text{H NMR}$  (400 MHz,  $\text{CDCl}_3$ )  $\delta$ : 7.76 (d,  $J = 8.0$  Hz, 2H), 7.64–7.85 (m, 4H), 7.48 (s, 2H), 7.46–7.42 (m, 2H), 7.38–7.34 (m, 1H), 5.34 (s, 1H), 5.30 (s, 1H), 2.64 (s, 6H), 1.47 (s, 18H).  $^{13}\text{C NMR}$  (101 MHz,  $\text{CDCl}_3$ )  $\delta$ : 154.1 (C), 141.1 (C), 140.4 (C), 136.2 (C), 133.9 (C), 129.9 (CH), 128.8 (CH), 127.5 (CH), 127.4 (CH), 127.0 (CH), 126.4 (CH), 124.8 (CH), 71.7 (CH), 37.9 ( $\text{CH}_3$ ), 34.4 (C), 30.3 ( $\text{CH}_3$ ). HRMS (ESI)  $m/z$ :  $[\text{M}+\text{H}]^+$  calcd for  $\text{C}_{29}\text{H}_{38}\text{NO}_3\text{S}$ : 480.2567; Found: 480.2568.

**1-(3,5-di-*tert*-butyl-4-hydroxyphenyl)-1-(4-methoxyphenyl)-*N,N*-dimethylmethanesulfonamide (3e)**

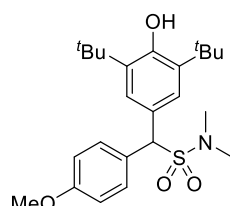

Yellow solid, mp 153–154 °C, 32.0 mg, 74% yield.  $R_f = 0.25$  (petroleum ether/ethyl acetate = 8:1).  $^1\text{H NMR}$  (400 MHz,  $\text{CDCl}_3$ )  $\delta$ : 7.58 (d,  $J = 8.8$  Hz, 2H), 7.41 (s, 2H), 6.91 (d,  $J = 8.8$  Hz, 2H), 5.26 (s, 1H), 5.22 (s, 1H), 3.80 (s, 3H), 2.59 (s, 6H), 1.44 (s, 18H).  $^{13}\text{C NMR}$  (101 MHz,  $\text{CDCl}_3$ )  $\delta$ : 159.5 (C), 154.0 (C), 136.0 (C), 130.7 (CH), 127.0 (C), 126.3 (CH), 125.0 (C), 114.1 (CH), 71.2 (CH), 55.3 ( $\text{CH}_3$ ), 37.9 ( $\text{CH}_3$ ), 34.4 (C), 30.2 ( $\text{CH}_3$ ). HRMS (ESI)  $m/z$ :  $[\text{M}+\text{H}]^+$  calcd for  $\text{C}_{24}\text{H}_{36}\text{NO}_3\text{S}$ : 434.2360; Found: 434.2366.

**1-(3,5-di-*tert*-butyl-4-hydroxyphenyl)-1-(4-fluorophenyl)-*N,N*-dimethylmethanesulfonamide (3f)**

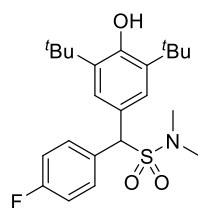

White solid, mp 168–169 °C, 28.2 mg, 67% yield.  $R_f = 0.35$  (petroleum ether/ethyl acetate = 8:1).  $^1\text{H NMR}$  (400 MHz,  $\text{CDCl}_3$ )  $\delta$ : 7.66–7.63 (m, 2H), 7.39 (s, 2H), 7.10–7.05 (m, 2H), 5.30 (s, 1H), 5.25 (s, 1H), 2.60 (s, 6H), 1.44 (s, 18H).  $^{13}\text{C NMR}$  (101 MHz,  $\text{CDCl}_3$ )  $\delta$ : 162.6 (d,  $J = 249.5$  Hz) (C), 154.2 (C), 136.2 (C), 131.2 (d,  $J = 8.1$  Hz) (C), 130.8 (d,  $J = 4.0$  Hz) (CH), 126.3 (CH), 124.5 (CH), 115.6 (d,  $J = 21.2$  Hz) (C), 71.0 (CH), 37.8 ( $\text{CH}_3$ ), 34.4 (C), 30.2 ( $\text{CH}_3$ ).  $^{19}\text{F NMR}$  (376 MHz,  $\text{CDCl}_3$ )  $\delta$ : -113.7. HRMS (ESI)  $m/z$ :  $[\text{M}+\text{Na}]^+$  calcd for  $\text{C}_{23}\text{H}_{32}\text{FNO}_3\text{SNa}$ : 444.1979; Found: 444.1977.

**1-(4-chlorophenyl)-1-(3,5-di-*tert*-butyl-4-hydroxyphenyl)-*N,N*-dimethylmethanesulfonamide (3g)**

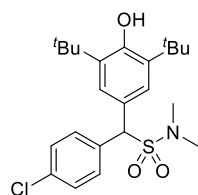

White solid, mp 180–181 °C, 33.2 mg, 76% yield.  $R_f = 0.4$  (petroleum ether/ethyl acetate = 8:1).  $^1\text{H NMR}$  (400 MHz,  $\text{CDCl}_3$ )  $\delta$ : 7.62–7.60 (m, 2H), 7.38–7.35 (m, 4H), 5.31 (s, 1H), 5.24 (s, 1H), 2.60 (s, 6H), 1.44 (s, 18H).  $^{13}\text{C NMR}$  (101 MHz,  $\text{CDCl}_3$ )  $\delta$ : 154.2 (C), 136.2 (C), 134.3 (C), 133.5 (C), 130.8 (CH), 128.9 (CH), 126.3 (CH), 124.3 (C), 71.1 (CH), 37.8 ( $\text{CH}_3$ ), 34.4 (C), 30.2 ( $\text{CH}_3$ ). HRMS (ESI)  $m/z$ :  $[\text{M}+\text{Na}]^+$  calcd for  $\text{C}_{23}\text{H}_{32}\text{NClO}_3\text{SNa}$ : 460.1684; Found: 460.1693.

**1-(4-bromophenyl)-1-(3,5-di-*tert*-butyl-4-hydroxyphenyl)-*N,N*-dimethylmethanesulfonamide (3h)**

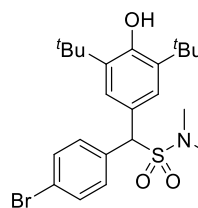

White solid, mp 177–178 °C, 34.6 mg, 72% yield.  $R_f = 0.45$  (petroleum ether/ethyl acetate = 8:1).  $^1\text{H NMR}$  (400 MHz,  $\text{CDCl}_3$ )  $\delta$ : 7.53 (q,  $J = 8.4$  Hz, 4H), 7.37 (s, 2H), 5.30 (s, 1H), 5.22 (s, 1H), 2.60 (s, 6H), 1.43 (s, 18H).  $^{13}\text{C NMR}$  (101 MHz,  $\text{CDCl}_3$ )  $\delta$ : 154.2 (C), 136.2 (C), 134.0 (C), 131.8 (CH), 131.1 (CH), 126.3 (CH), 124.2 (C), 122.5 (C), 71.2 (CH), 37.9 ( $\text{CH}_3$ ), 34.4 (C), 30.2 ( $\text{CH}_3$ ). HRMS (ESI)  $m/z$ :  $[\text{M}+\text{H}]^+$  calcd for  $\text{C}_{23}\text{H}_{33}\text{BrNO}_3\text{S}$ : 482.1359; Found: 482.1352.



**1-(3,5-di-*tert*-butyl-4-hydroxyphenyl)-*N,N*-dimethyl-1-(*m*-tolyl)methanesulfonamide (3i)**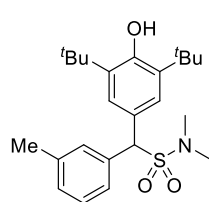

White solid, mp 155–156 °C, 32.9 mg, 79 % yield.  $R_f = 0.35$  (petroleum ether/ethyl acetate = 8:1).  $^1\text{H NMR}$  (400 MHz,  $\text{CDCl}_3$ )  $\delta$ : 7.93 (d,  $J = 8.0$  Hz, 1H), 7.19 (s, 2H), 7.11–7.07 (m, 1H), 7.03–6.96 (m, 1H), 5.35 (s, 1H), 5.06 (s, 1H), 2.43 (s, 6H), 2.24 (s, 3H), 1.23 (s, 18H).  $^{13}\text{C NMR}$  (101 MHz,  $\text{CDCl}_3$ )  $\delta$ : 154.0 (C), 136.1 (C), 136.0 (C), 133.6 (C), 130.8 (CH), 128.5 (CH), 128.0 (CH), 126.5 (CH), 126.4 (CH), 124.5 (C), 66.8 (CH), 37.9 (CH<sub>3</sub>), 34.4 (C), 30.2 (CH<sub>3</sub>), 20.1 (CH<sub>3</sub>). HRMS (ESI)  $m/z$ :  $[\text{M}+\text{H}]^+$  calcd for  $\text{C}_{24}\text{H}_{36}\text{NO}_3\text{S}$ : 418.2410; Found: 418.2406.

**1-(3,5-di-*tert*-butyl-4-hydroxyphenyl)-1-(3-methoxyphenyl)-*N,N*-dimethylmethanesulfonamide (3j)**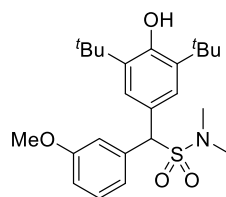

White solid, mp 143–144 °C, 36.4 mg, 84% yield.  $R_f = 0.25$  (petroleum ether/ethyl acetate = 8:1).  $^1\text{H NMR}$  (400 MHz,  $\text{CDCl}_3$ )  $\delta$ : 7.36 (s, 2H), 7.24–7.16 (m, 3H), 6.81–6.78 (m, 1H), 5.20 (s, 3H), 5.16 (s, 3H), 3.75 (s, 3H), 2.53 (s, 6H), 1.36 (s, 18H).  $^{13}\text{C NMR}$  (101 MHz,  $\text{CDCl}_3$ )  $\delta$ : 159.6 (C), 154.1 (C), 136.3 (C), 136.0 (C), 129.6 (CH), 126.3 (CH), 124.6 (C), 121.8 (CH), 114.9 (CH), 114.0 (CH), 71.7 (CH), 55.2 (CH<sub>3</sub>), 37.8 (CH<sub>3</sub>), 34.4 (C), 30.2 (CH<sub>3</sub>). HRMS (ESI)  $m/z$ :  $[\text{M}+\text{H}]^+$  calcd for  $\text{C}_{24}\text{H}_{36}\text{NO}_3\text{S}$ : 434.2360; Found: 434.2368.

**1-(3,5-di-*tert*-butyl-4-hydroxyphenyl)-1-(3-fluorophenyl)-*N,N*-dimethylmethanesulfonamide (3k)**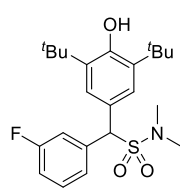

White solid, mp 174–175 °C, 35.8 mg, 85% yield.  $R_f = 0.35$  (petroleum ether/ethyl acetate = 8:1).  $^1\text{H NMR}$  (400 MHz,  $\text{CDCl}_3$ )  $\delta$ : 7.45–7.32 (m, 5H), 7.05–7.00 (m, 1H), 5.31 (s, 1H), 5.25 (s, 1H), 2.61 (s, 6H), 1.44 (s, 18H).  $^{13}\text{C NMR}$  (101 MHz,  $\text{CDCl}_3$ )  $\delta$ : 162.7 (d,  $J = 247.5$  Hz) (C), 154.3 (C), 137.3 (d,  $J = 7.1$  Hz) (C), 130.1 (d,  $J = 9.1$  Hz) (CH), 126.3 (CH), 125.2 (d,  $J = 3.0$  Hz) (CH), 124.2 (C), 116.5 (d,  $J = 22.2$  Hz) (CH), 115.3 (d,  $J = 21.2$  Hz) (CH), 71.3 (CH), 37.8 (CH<sub>3</sub>), 34.4 (C), 30.2 (CH<sub>3</sub>).  $^{19}\text{F NMR}$  (376 MHz,  $\text{CDCl}_3$ )  $\delta$ : -112.0. HRMS (ESI)  $m/z$ :  $[\text{M}+\text{Na}]^+$  calcd for  $\text{C}_{23}\text{H}_{32}\text{FNO}_3\text{SNa}$ : 444.1979; Found: 444.1977.

**1-(3,5-di-*tert*-butyl-4-hydroxyphenyl)-*N,N*-dimethyl-1-(*o*-tolyl)methanesulfonamide (3l)**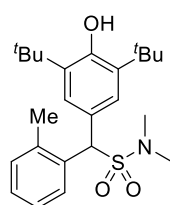

White solid, mp 145–146 °C, 32.5 mg, 78 % yield.  $R_f = 0.35$  (petroleum ether/ethyl acetate = 8:1).  $^1\text{H NMR}$  (400 MHz,  $\text{CDCl}_3$ )  $\delta$ : 7.95 (d,  $J = 8.0$  Hz, 1H), 7.20 (s, 2H), 7.12–7.06 (m, 1H), 7.04–6.97 (m, 1H), 5.36 (s, 1H), 5.09 (s, 1H), 2.44 (s, 6H), 2.25 (s, 3H), 1.24 (s, 18H).  $^{13}\text{C NMR}$  (101 MHz,  $\text{CDCl}_3$ )  $\delta$ : 154.0 (C), 136.0 (C), 135.9 (C), 133.6 (C), 130.8 (CH), 128.4 (CH), 128.0 (CH), 126.6 (CH), 126.4 (CH), 124.4 (C), 66.7 (CH), 37.8 (CH<sub>3</sub>), 34.3 (C), 30.2 (CH<sub>3</sub>), 20.1 (CH<sub>3</sub>). HRMS (ESI)  $m/z$ :  $[\text{M}+\text{Na}]^+$  calcd for  $\text{C}_{24}\text{H}_{35}\text{NO}_3\text{SNa}$ : 440.2230; Found: 440.2242.

**1-(3,5-di-*tert*-butyl-4-hydroxyphenyl)-1-(2-methoxyphenyl)-*N,N*-dimethylmethanesulfonamide (3m)**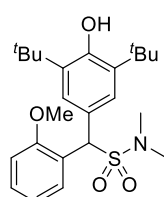

White solid, mp 149–150 °C, 35.5 mg, 82 % yield.  $R_f = 0.25$  (petroleum ether/ethyl acetate = 8:1).  $^1\text{H NMR}$  (400 MHz,  $\text{CDCl}_3$ )  $\delta$ : 7.58 (d,  $J = 8.8$  Hz, 2H), 7.41 (s, 2H), 6.91 (d,  $J = 8.8$  Hz, 2H), 5.26 (s, 1H), 5.22 (s, 1H), 3.80 (s, 3H), 2.59 (s, 6H), 1.44 (s, 18H).  $^{13}\text{C NMR}$  (101 MHz,  $\text{CDCl}_3$ )  $\delta$ : 156.5 (C), 153.8 (C), 135.8 (C), 129.9 (CH), 129.2 (CH), 126.6 (CH), 125.1 (C), 123.6 (C), 120.8 (CH), 110.8 (CH), 61.7 (CH),

55.7 (CH<sub>3</sub>), 37.8 (CH<sub>3</sub>), 34.4 (C), 30.2 (CH<sub>3</sub>). HRMS (ESI) m/z: [M+H]<sup>+</sup> calcd for C<sub>24</sub>H<sub>36</sub>NO<sub>3</sub>S: 434.2360; Found: 434.2351.

**1-(3,5-di-*tert*-butyl-4-hydroxyphenyl)-1-(2-fluorophenyl)-*N,N*-dimethylmethanesulfonamide (3n)**

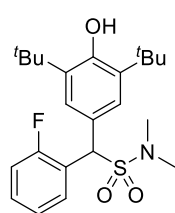

White solid, mp 167–168 °C, 34.1 mg, 81% yield. *R*<sub>f</sub> = 0.4 (petroleum ether/ethyl acetate = 8:1). <sup>1</sup>H NMR (400 MHz, CDCl<sub>3</sub>) δ: 8.06 (t, *J* = 7.6 Hz, 1H), 7.43 (s, 2H), 7.33-7.28 (m, 1H), 7.23-7.19 (m, 1H), 7.11-7.06 (m, 1H), 5.74 (s, 1H), 5.28 (s, 1H), 2.64 (s, 3H), 1.44 (s, 18H). <sup>13</sup>C NMR (101 MHz, CDCl<sub>3</sub>) δ: 160.3 (*J* = 247.5 Hz) (C), 159.0 (C), 154.2 (C), 136.2 (C), 130.3 (*J* = 2.0 Hz) (CH), 129.8 (*J* = 9.1 Hz) (CH), 126.5 (CH), 124.4 (*J* = 3.0 Hz) (CH), 122.8 (*J* = 14.1 Hz) (C), 115.5 (*J* = 23.2 Hz) (CH), 62.0 (*J* = 4.0 Hz) (CH), 37.3 (CH<sub>3</sub>), 34.4 (C), 30.2 (CH<sub>3</sub>). <sup>19</sup>F NMR (376 MHz, CDCl<sub>3</sub>) δ: -118.1. HRMS (ESI) m/z: [M+Na]<sup>+</sup> calcd for C<sub>23</sub>H<sub>32</sub>FNO<sub>3</sub>SNa: 444.1979; Found: 444.1967.

**1-(2-chlorophenyl)-1-(3,5-di-*tert*-butyl-4-hydroxyphenyl)-*N,N*-dimethylmethanesulfonamide (3o)**

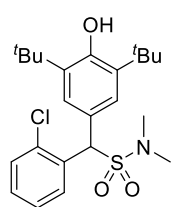

White solid, mp 160–161 °C, 31.5 mg, 72% yield. *R*<sub>f</sub> = 0.35 (petroleum ether/ethyl acetate = 8:1). <sup>1</sup>H NMR (400 MHz, CDCl<sub>3</sub>) δ: 8.01 (d, *J* = 8.0 Hz, 1H), 7.24 (s, 2H), 7.22-7.20 (m, 1H), 7.17-7.13 (m, 1H), 7.08-7.04 (m, 1H), 5.80 (s, 1H), 5.08 (s, 1H), 2.46 (s, 6H), 1.24 (s, 18H). <sup>13</sup>C NMR (101 MHz, CDCl<sub>3</sub>) δ: 154.1 (C), 136.1 (C), 134.2 (C), 133.2 (C), 130.2 (CH), 129.8 (CH), 129.3 (CH), 127.2 (CH), 126.4 (CH), 124.3 (C), 66.2 (CH), 37.8 (CH<sub>3</sub>), 34.4 (C), 30.2 (CH<sub>3</sub>). HRMS (ESI) m/z: [M+Na]<sup>+</sup> calcd for C<sub>23</sub>H<sub>32</sub>ClNO<sub>3</sub>SNa: 460.1684; Found: 460.1674.

**1-(2-bromophenyl)-1-(3,5-di-*tert*-butyl-4-hydroxyphenyl)-*N,N*-dimethylmethanesulfonamide (3p)**

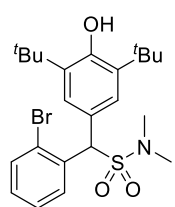

White solid, mp 159–160 °C, 36.1 mg, 75% yield. *R*<sub>f</sub> = 0.5 (petroleum ether/ethyl acetate = 8:1). <sup>1</sup>H NMR (400 MHz, CDCl<sub>3</sub>) δ: 8.21 (dd, *J* = 8.0, 1.6 Hz, 1H), 7.59 (dd, *J* = 8.0, 1.6 Hz, 1H), 7.44 (s, 2H), 7.38 (td, *J* = 7.6, 1.6 Hz, 1H), 7.17 (td, *J* = 7.6, 1.6 Hz, 1H), 5.60 (s, 1H), 5.27 (s, 1H), 2.65 (s, 6H), 1.43 (s, 18H). <sup>13</sup>C NMR (101 MHz, CDCl<sub>3</sub>) δ: 154.1 (C), 136.0 (C), 134.9 (C), 133.2 (CH), 130.3 (CH), 129.6 (CH), 127.8 (CH), 126.4 (CH), 125.2 (C), 124.3 (C), 69.0 (CH), 37.8 (CH<sub>3</sub>), 34.3 (C), 30.2 (CH<sub>3</sub>). HRMS (ESI) m/z: [M+H]<sup>+</sup> calcd for C<sub>23</sub>H<sub>33</sub>BrNO<sub>3</sub>S: 482.1359; Found: 482.1367.

**1-(3,5-di-*tert*-butyl-4-hydroxyphenyl)-1-(3,5-dimethoxyphenyl)-*N,N*-dimethylmethanesulfonamide (3q)**

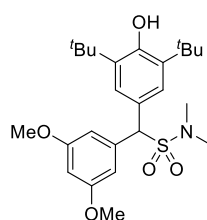

White solid, mp 154–155 °C, 43.1 mg, 93% yield. *R*<sub>f</sub> = 0.2 (petroleum ether/ethyl acetate = 8:1). <sup>1</sup>H NMR (400 MHz, CDCl<sub>3</sub>) δ: 7.43 (s, 2H), 6.85 (d, *J* = 2.4 Hz, 2H), 6.42 (t, *J* = 2.4 Hz, 1H), 5.28 (s, 1H), 5.17 (s, 1H), 3.80 (s, 6H), 2.62 (s, 6H), 1.43 (s, 18H). <sup>13</sup>C NMR (101 MHz, CDCl<sub>3</sub>) δ: 160.7 (C), 154.1 (C), 136.9 (C), 136.0 (C), 126.3 (CH), 124.5 (C), 107.5 (CH), 100.4 (CH), 71.7 (CH), 55.3 (CH<sub>3</sub>), 37.9 (CH<sub>3</sub>), 34.4 (C), 30.2 (CH<sub>3</sub>). HRMS (ESI) m/z: [M+Na]<sup>+</sup> calcd for C<sub>25</sub>H<sub>37</sub>NO<sub>5</sub>SNa: 486.2285; Found: 486.2287.

**1-(3,5-di-*tert*-butyl-4-hydroxyphenyl)-*N,N*-dimethyl-1-(3,4,5-trimethoxyphenyl)methanesulfonamide (3r)**

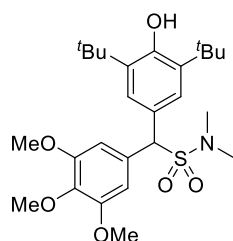

White solid, mp 172–173 °C, 42.9 mg, 87% yield.  $R_f$  = 0.2 (petroleum ether/ethyl acetate = 4:1).  $^1\text{H NMR}$  (400 MHz,  $\text{CDCl}_3$ )  $\delta$ : 7.44 (s, 2H), 6.94 (s, 2H), 5.31 (s, 1H), 5.17 (s, 1H), 3.89 (s, 6H), 3.83 (s, 3H), 2.61 (s, 6H), 1.44 (s, 18H).  $^{13}\text{C NMR}$  (101 MHz,  $\text{CDCl}_3$ )  $\delta$ : 154.2 (C), 153.1 (C), 137.9 (C), 136.1 (C), 130.2 (C), 126.3 (CH), 124.5 (C), 106.6 (CH), 71.7 (CH), 60.8 ( $\text{CH}_3$ ), 56.1 ( $\text{CH}_3$ ), 37.9 ( $\text{CH}_3$ ), 34.4 (C), 30.2 ( $\text{CH}_3$ ). HRMS (ESI)  $m/z$ :  $[\text{M}+\text{H}]^+$  calcd for  $\text{C}_{26}\text{H}_{40}\text{NO}_6\text{S}$ : 494.2571; Found: 494.2567.

**1-(3,5-di-*tert*-butyl-4-hydroxyphenyl)-*N,N*-dimethyl-1-(naphthalen-1-yl)methanesulfonamide (3s)**

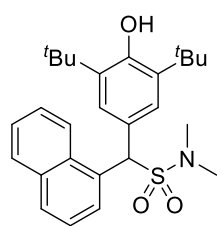

White solid, mp 151–152 °C, 38.1 mg, 84% yield.  $R_f$  = 0.45 (petroleum ether/ethyl acetate = 8:1).  $^1\text{H NMR}$  (400 MHz,  $\text{CDCl}_3$ )  $\delta$ : 8.39 (d,  $J$  = 7.2 Hz, 1H), 8.13 (d,  $J$  = 8.4 Hz, 1H), 7.89–7.83 (m, 2H), 7.60–7.55 (m, 2H), 7.51–7.48 (m, 3H), 6.19 (s, 1H), 5.25 (s, 1H), 2.58 (s, 6H), 1.42 (s, 18H).  $^{13}\text{C NMR}$  (101 MHz,  $\text{CDCl}_3$ )  $\delta$ : 154.1 (C), 136.0 (C), 134.1 (C), 131.3 (C), 130.8 (C), 129.3 (CH), 128.8 (CH), 127.1 (CH), 126.7 (CH), 126.6 (CH), 125.6 (CH), 125.4 (CH), 124.8 (CH), 122.2 (C), 66.0 (CH), 37.9 ( $\text{CH}_3$ ), 34.3 (C), 30.2 ( $\text{CH}_3$ ). HRMS (ESI)  $m/z$ :  $[\text{M}+\text{H}]^+$  calcd for  $\text{C}_{27}\text{H}_{36}\text{NO}_3\text{S}$ : 454.2410; Found: 454.2407.

**1-(3,5-di-*tert*-butyl-4-hydroxyphenyl)-*N,N*-dimethyl-1-(naphthalen-2-yl)methanesulfonamide (3t)**

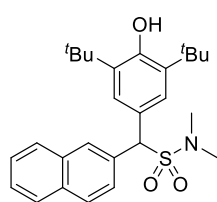

Yellow solid, mp 109–110 °C, 34.9 mg, 77% yield.  $R_f$  = 0.3 (petroleum ether/ethyl acetate = 8:1).  $^1\text{H NMR}$  (400 MHz,  $\text{CDCl}_3$ )  $\delta$ : 8.14 (s, 1H), 7.89–7.83 (m, 4H), 7.54 (s, 2H), 7.51–7.49 (m, 2H), 5.50 (s, 1H), 5.31 (s, 1H), 2.64 (s, 6H), 1.47 (s, 18H).  $^{13}\text{C NMR}$  (101 MHz,  $\text{CDCl}_3$ )  $\delta$ : 154.1 (C), 136.1 (C), 133.2 (C), 132.9 (C), 132.4 (C), 128.8 (CH), 128.3 (CH), 128.1 (CH), 127.5 (CH), 126.9 (CH), 126.4 (CH), 126.4 (CH), 126.3 (CH), 124.8 (C), 72.0 (CH), 37.9 ( $\text{CH}_3$ ), 34.4 (C), 30.2 ( $\text{CH}_3$ ). HRMS (ESI)  $m/z$ :  $[\text{M}+\text{H}]^+$  calcd for  $\text{C}_{27}\text{H}_{36}\text{NO}_3\text{S}$ : 454.2410; Found: 454.2416.

**1-(3,5-di-*tert*-butyl-4-hydroxyphenyl)-1-(6-methoxynaphthalen-2-yl)-*N,N*-dimethylmethanesulfonamide (3u)**

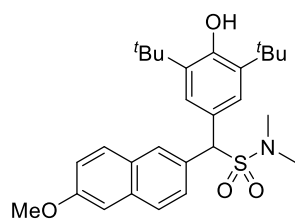

White solid, mp 197–198 °C, 40.1 mg, 83% yield.  $R_f$  = 0.4 (petroleum ether/ethyl acetate = 8:1).  $^1\text{H NMR}$  (400 MHz,  $\text{CDCl}_3$ )  $\delta$ : 8.01 (d,  $J$  = 1.6 Hz, 1H), 7.81–7.74 (m, 3H), 7.49 (s, 2H), 7.15 (dd,  $J$  = 8.8, 2.0 Hz, 1H), 7.11 (d,  $J$  = 2.8 Hz, 1H), 5.42 (s, 1H), 5.28 (s, 1H), 3.92 (s, 3H), 2.60 (s, 6H), 1.44 (s, 18H).  $^{13}\text{C NMR}$  (101 MHz,  $\text{CDCl}_3$ )  $\delta$ : 158.0 (C), 154.0 (C), 136.0 (C), 134.2 (C), 129.9 (CH), 129.6 (C), 128.7 (C), 128.7 (CH), 127.4 (CH), 127.2 (CH), 126.4 (CH), 124.9 (C), 119.2 (CH), 105.4 (CH), 71.8 (CH), 55.3 ( $\text{CH}_3$ ), 37.9 ( $\text{CH}_3$ ), 34.4 (C), 30.2 ( $\text{CH}_3$ ). HRMS (ESI)  $m/z$ :  $[\text{M}+\text{H}]^+$  calcd for  $\text{C}_{28}\text{H}_{38}\text{NO}_4\text{S}$ : 484.2516; Found: 484.2501.

**1-(3,5-di-*tert*-butyl-4-hydroxyphenyl)-*N,N*-dimethyl-1-(pyridin-2-yl)methanesulfonamide (3v)**

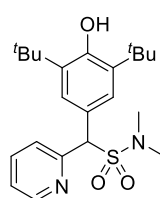

White solid, mp 144–145 °C, 30.3 mg, 75% yield.  $R_f$  = 0.2 (petroleum ether/ethyl acetate = 3:1).  $^1\text{H NMR}$  (400 MHz,  $\text{CDCl}_3$ )  $\delta$ : 8.59 (dt,  $J$  = 4.0, 0.8 Hz, 1H),

7.89–7.87 (m, 1H), 7.73 (td,  $J = 7.6, 2.0$  Hz, 1H), 7.52 (s, 2H), 7.25–7.23 (m, 1H), 5.59 (s, 1H), 5.28 (s, 1H), 2.62 (s, 6H), 1.44 (s, 18H).  $^{13}\text{C}$  NMR (101 MHz,  $\text{CDCl}_3$ )  $\delta$ : 155.0 (C), 154.3 (C), 149.2 (CH), 136.9 (CH), 136.1 (C), 126.7 (CH), 124.1 (CH), 123.7 (C), 123.1 (CH), 73.9 (CH), 37.8 ( $\text{CH}_3$ ), 34.4 (C), 30.2 ( $\text{CH}_3$ ). HRMS (ESI)  $m/z$ :  $[\text{M}+\text{H}]^+$  calcd for  $\text{C}_{22}\text{H}_{33}\text{N}_2\text{O}_3\text{S}$ : 405.2206; Found: 405.2211.

**1-(3,5-di-*tert*-butyl-4-hydroxyphenyl)-*N,N*-dimethyl-1-(thiophen-3-yl)methanesulfonamide (3w)**

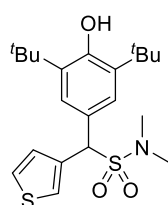

Yellow solid, mp 162–163 °C, 32.7 mg, 80% yield.  $R_f = 0.3$  (petroleum ether/ethyl acetate = 8:1).  $^1\text{H}$  NMR (400 MHz,  $\text{CDCl}_3$ )  $\delta$ : 7.48–7.47 (m, 1H), 7.39–7.38 (m, 3H), 7.34–7.32 (m, 1H), 5.41 (s, 1H), 5.29 (s, 1H), 2.59 (s, 6H), 1.44 (s, 18H).  $^{13}\text{C}$  NMR (101 MHz,  $\text{CDCl}_3$ )  $\delta$ : 154.2 (C), 136.1 (C), 134.9 (C), 128.5 (CH), 126.5 (CH), 125.8 (CH), 124.9 (CH), 124.3 (C), 67.5 (CH), 37.7 ( $\text{CH}_3$ ), 34.4 (C), 30.2 ( $\text{CH}_3$ ). HRMS (ESI)  $m/z$ :  $[\text{M}+\text{H}]^+$  calcd for  $\text{C}_{21}\text{H}_{33}\text{N}_2\text{O}_3\text{S}$ : 410.1818; Found: 410.1808.

**1-(3,5-di-*tert*-butyl-4-hydroxyphenyl)-*N,N*-dimethyl-1-(thiophen-2-yl)methanesulfonamide (3x)**

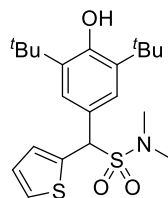

White solid, mp 164–165 °C, 33.5 mg, 82% yield.  $R_f = 0.3$  (petroleum ether/ethyl acetate = 8:1).  $^1\text{H}$  NMR (400 MHz,  $\text{CDCl}_3$ )  $\delta$ : 7.48–7.47 (m, 1H), 7.39–7.38 (m, 3H), 7.34–7.32 (m, 1H), 5.41 (s, 1H), 5.29 (s, 1H), 2.58 (s, 6H), 1.44 (s, 18H).  $^{13}\text{C}$  NMR (101 MHz,  $\text{CDCl}_3$ )  $\delta$ : 154.2 (C), 136.2 (C), 134.9 (C), 128.5 (CH), 126.5 (CH), 125.8 (CH), 125.0 (CH), 124.4 (C), 67.5 (CH), 37.7 ( $\text{CH}_3$ ), 34.4 (C), 30.3 ( $\text{CH}_3$ ). HRMS (ESI)  $m/z$ :  $[\text{M}+\text{H}]^+$  calcd for  $\text{C}_{21}\text{H}_{33}\text{N}_2\text{O}_3\text{S}$ : 410.1818; Found: 410.1812.

**1-(4-hydroxy-3,5-diisopropylphenyl)-*N,N*-dimethyl-1-phenylmethanesulfonamide (3z)**

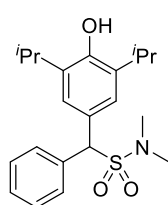

Yellow oil, 16.9 mg, 45% yield.  $R_f = 0.3$  (petroleum ether/ethyl acetate = 5:1).  $^1\text{H}$  NMR (400 MHz,  $\text{CDCl}_3$ )  $\delta$ : 7.67–7.65 (m, 2H), 7.39–7.31 (m, 5H), 5.41 (s, 1H), 5.29 (s, 1H), 4.92 (s, 1H), 3.18–3.11 (m, 2H), 2.60 (s, 6H), 1.27–1.26 (m, 12H).  $^{13}\text{C}$  NMR (101 MHz,  $\text{CDCl}_3$ )  $\delta$ : 150.3 (C), 134.9 (C), 134.0 (C), 129.5 (CH), 128.7 (CH), 128.3 (CH), 126.0 (CH), 125.0 (C), 71.8 (CH), 37.9 ( $\text{CH}_3$ ), 27.3 (CH), 27.0 ( $\text{CH}_3$ ). HRMS (ESI)  $m/z$ :  $[\text{M}-\text{H}]^+$  calcd for  $\text{C}_{21}\text{H}_{29}\text{NO}_3\text{S}$ : 374.1793; Found: 374.1756.

**1-(3,5-di-*tert*-butyl-4-hydroxyphenyl)-1-(3,5-dimethoxyphenyl)-*N,N*-diethylmethanesulfonamide (4a)**

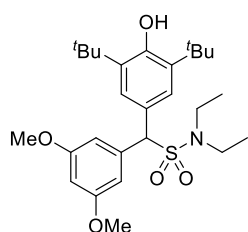

White solid, mp 142–143 °C, 38.3 mg, 78% yield.  $R_f = 0.3$  (petroleum ether/ethyl acetate = 8:1).  $^1\text{H}$  NMR (400 MHz,  $\text{CDCl}_3$ )  $\delta$ : 7.42 (s, 1H), 6.84 (d,  $J = 2.4$  Hz, 2H), 6.41 (t,  $J = 2.4$  Hz, 1H), 5.25 (s, 1H), 5.06 (s, 1H), 3.79 (s, 6H), 3.09–3.03 (m, 4H), 1.44 (s, 18H), 1.00 (t,  $J = 7.2$  Hz, 1H).  $^{13}\text{C}$  NMR (101 MHz,  $\text{CDCl}_3$ )  $\delta$ : 160.7 (C), 153.9 (C), 137.4 (C), 135.9 (C), 126.4 (CH), 125.1 (C), 107.7 (CH), 100.4 (CH), 73.5 (CH), 55.3 ( $\text{CH}_3$ ), 42.3 ( $\text{CH}_2$ ), 34.3 (C), 30.2 ( $\text{CH}_3$ ), 14.5 ( $\text{CH}_3$ ). HRMS (ESI)  $m/z$ :  $[\text{M}+\text{H}]^+$  calcd for  $\text{C}_{27}\text{H}_{42}\text{NO}_5\text{S}$ : 492.2778; Found: 492.2786.

**1-(3,5-di-*tert*-butyl-4-hydroxyphenyl)-1-(3,5-dimethoxyphenyl)-*N*-ethyl-*N*-methylmethanesulfonamide (4b)**

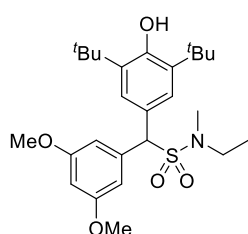

White solid, mp 117–118 °C, 39.1 mg, 82% yield.  $R_f = 0.2$  (petroleum ether/ethyl acetate = 8:1).  $^1\text{H}$  NMR (400 MHz,  $\text{CDCl}_3$ )  $\delta$ : 7.42 (s, 2H), 6.84 (d,

$J = 2.0$  Hz, 1H), 6.41 (t,  $J = 2.4$  Hz, 1H), 5.26 (s, 1H), 5.12 (s, 1H), 3.80 (s, 6H), 3.00-2.67 (m, 2H), 2.61 (s, 3H), 1.43 (s, 18H), 1.01 (t,  $J = 7.2$  Hz, 3H).  $^{13}\text{C}$  NMR (101 MHz,  $\text{CDCl}_3$ )  $\delta$ : 160.7 (C), 154.0 (C), 137.1 (C), 135.9 (C), 126.4 (CH), 124.8 (C), 107.6 (CH), 100.4 (CH), 72.4 (CH), 55.3 ( $\text{CH}_3$ ), 45.2 ( $\text{CH}_2$ ), 34.4 (C), 34.2 ( $\text{CH}_3$ ), 30.2 ( $\text{CH}_3$ ), 13.7 ( $\text{CH}_3$ ). HRMS (ESI)  $m/z$ :  $[\text{M}+\text{H}]^+$  calcd for  $\text{C}_{26}\text{H}_{40}\text{NO}_5\text{S}$ : 478.2622; Found: 478.2626.

**2,6-di-*tert*-butyl-4-((3,5-dimethoxyphenyl)(pyrrolidin-1-ylsulfonyl)methyl)phenol (4c)**

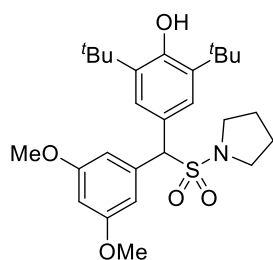

White solid, mp 142–143 °C, 36.2 mg, 74% yield.  $R_f = 0.2$  (petroleum ether/ethyl acetate = 8:1).  $^1\text{H}$  NMR (400 MHz,  $\text{CDCl}_3$ )  $\delta$ : 7.44 (s, 2H), 6.86 (d,  $J = 2.4$  Hz, 1H), 6.41 (t,  $J = 2.0$  Hz, 1H), 5.26 (s, 1H), 5.23 (s, 1H), 3.80 (s, 6H), 3.17-3.12 (m, 2H), 3.09-3.03 (m, 2H), 1.72-1.64 (m, 4H), 1.43 (s, 18H).  $^{13}\text{C}$  NMR (101 MHz,  $\text{CDCl}_3$ )  $\delta$ : 160.7 (C), 154.0 (C), 137.2 (C), 135.9 (C), 126.4 (CH), 124.9 (C), 107.6 (CH), 100.4 (CH), 71.7 (CH), 55.3 ( $\text{CH}_2$ ), 48.3 ( $\text{CH}_2$ ), 34.4 (C), 30.2 ( $\text{CH}_3$ ), 25.8 ( $\text{CH}_2$ ). HRMS (ESI)  $m/z$ :

$[\text{M}+\text{H}]^+$  calcd for  $\text{C}_{27}\text{H}_{40}\text{NO}_5\text{S}$ : 490.2622; Found: 490.2622.

**2,6-di-*tert*-butyl-4-((3,5-dimethoxyphenyl)(piperidin-1-ylsulfonyl)methyl)phenol (4d)**

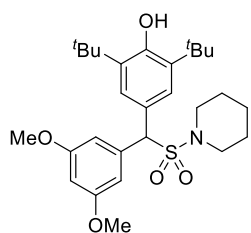

White solid, mp 119–120 °C, 38.2 mg, 76% yield.  $R_f = 0.3$  (petroleum ether/ethyl acetate = 8:1).  $^1\text{H}$  NMR (400 MHz,  $\text{CDCl}_3$ )  $\delta$ : 7.42 (s, 2H), 6.84 (d,  $J = 2.4$  Hz, 2H), 6.41 (t,  $J = 2.4$  Hz, 1H), 5.26 (s, 1H), 5.08 (s, 1H), 3.04-2.93 (m, 4H), 1.44 (s, 18H), 1.41-1.31 (m, 6H).  $^{13}\text{C}$  NMR (101 MHz,  $\text{CDCl}_3$ )  $\delta$ : 160.7 (C), 154.1 (C), 137.1 (C), 136.0 (C), 126.5 (CH), 124.8 (C), 107.7 (CH), 100.4 (CH), 72.6 (CH), 55.4 ( $\text{CH}_3$ ), 47.1 ( $\text{CH}_2$ ), 34.4 ( $\text{CH}_2$ ), 30.3 ( $\text{CH}_3$ ), 25.7 ( $\text{CH}_2$ ), 23.8 ( $\text{CH}_2$ ). HRMS (ESI)  $m/z$ :  $[\text{M}+\text{H}]^+$  calcd for  $\text{C}_{28}\text{H}_{42}\text{NO}_5\text{S}$ : 504.2778; Found: 504.2780.

**2,6-di-*tert*-butyl-4-((3,5-dimethoxyphenyl)((4-methylpiperidin-1-yl)sulfonyl)methyl)phenol (4e)**

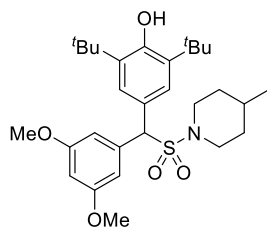

White solid, mp 112–113 °C, 41.9 mg, 81% yield.  $R_f = 0.3$  (petroleum ether/ethyl acetate = 8:1).  $^1\text{H}$  NMR (400 MHz,  $\text{CDCl}_3$ )  $\delta$ : 7.42 (s, 2H), 6.83 (d,  $J = 2.4$  Hz, 2H), 6.41 (t,  $J = 2.4$  Hz, 2H), 5.25 (s, 1H), 5.08 (s, 1H), 3.80 (s, 6H), 3.67-3.58 (m, 2H), 2.45 (td,  $J = 12.0, 2.4$  Hz, 1H), 2.29 (td,  $J = 12.4, 2.8$  Hz, 1H), 1.44 (s, 18H), 1.31-1.23 (m, 2H), 1.06-0.92 (m, 3H), 0.85 (d,  $J = 6.4$  Hz, 3H).  $^{13}\text{C}$  NMR (101 MHz,  $\text{CDCl}_3$ )  $\delta$ : 160.7 (C), 154.1 (C), 137.1

(C), 136.0 (C), 126.4 (CH), 124.8 (C), 107.7 (CH), 100.5 (CH), 72.7 (CH), 55.3 ( $\text{CH}_3$ ), 46.5 ( $\text{CH}_2$ ), 46.4 ( $\text{CH}_2$ ), 34.4 (C), 34.0 ( $\text{CH}_2$ ), 33.9 ( $\text{CH}_2$ ), 30.4 (CH), 30.3 ( $\text{CH}_3$ ), 21.5 ( $\text{CH}_3$ ). HRMS (ESI)  $m/z$ :  $[\text{M}+\text{H}]^+$  calcd for  $\text{C}_{29}\text{H}_{44}\text{NO}_5\text{S}$ : 518.2935; Found: 518.2939.

**2,6-di-*tert*-butyl-4-((3,5-dimethoxyphenyl)(morpholin-1-ylsulfonyl)methyl)phenol (4f)**

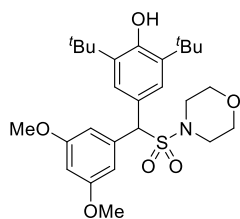

White solid, mp 167–168 °C, 38.9 mg, 77% yield.  $R_f = 0.45$  (petroleum ether/ethyl acetate = 3:1).  $^1\text{H}$  NMR (400 MHz,  $\text{CDCl}_3$ )  $\delta$ : 7.42 (s, 2H), 6.83 (d,  $J = 2.4$  Hz, 2H), 6.43 (t,  $J = 2.4$  Hz, 1H), 5.29 (s, 1H), 5.10 (s, 1H), 3.80 (s, 6H), 3.51 (q,  $J = 5.2$  Hz, 4H), 3.04-3.01 (m, 4H), 1.44 (s, 18H).  $^{13}\text{C}$  NMR (101 MHz,  $\text{CDCl}_3$ )  $\delta$ : 160.8 (C), 154.2 (C), 136.5 (C), 136.1 (C), 126.4 (CH), 124.3 (C), 107.7 (CH), 100.5 (CH), 72.8 (CH), 66.8 ( $\text{CH}_2$ ), 55.4 ( $\text{CH}_3$ ), 46.4 ( $\text{CH}_2$ ),

34.4 (C), 30.2 ( $\text{CH}_3$ ). HRMS (ESI)  $m/z$ :  $[\text{M}+\text{H}]^+$  calcd for  $\text{C}_{27}\text{H}_{40}\text{O}_6\text{S}$ : 506.2571; Found: 506.2577.

## (E) Synthetic application

### (1) Procedure for the Synthesis of **3q** at 1.0 mmol Scale.

To an 50 mL vial equipped with a magnetic stir bar was added **1q** (356.0 mg, 1.0 mmol), *N,N*-dimethylsulfamoyl chloride **2a** (288.0 mg, 2.0 mmol), (TMS)<sub>3</sub>SiH (498.0 mg, 2.0 mmol), Rhodamine 6G (24.0 mg, 5.0 mol%) and MeCN (10 mL) under nitrogen atmosphere and sealed with PTFE cap. Then the reaction mixture was stirred upon 40 W blue LED (450–465 nm) at room temperature for 24 h. The solvent was concentrated in vacuo and the residue was purified by a column chromatography on silica gel with petroleum ether/ethyl acetate (6:1) as eluent to provide the desired product **3q** as a white solid (416.7 mg, 90% yield).

### (2) Sunlight driven experiment

To an 8 mL vial equipped with a magnetic stir bar was added **1q** (70.8 mg, 0.2 mmol), *N,N*-dimethylsulfamoyl chloride **2a** (57.2 mg, 0.4 mmol), (TMS)<sub>3</sub>SiH (99.6 mg, 0.4 mmol), Rhodamine 6G (4.8 mg, 5.0 mol%) and MeCN (2 mL) under nitrogen atmosphere and sealed with PTFE cap. The reaction mixture was stirred upon sunlight irradiation under argon atmosphere for 12 h. Then the solvent was concentrated in vacuo and the residue was purified by a column chromatography on silica gel with petroleum ether/ethyl acetate (6:1) as eluent to provide the desired product **3q** as a white solid (68.7 mg, 74% yield).

## (F) Radical trapping experiment with TEMPO

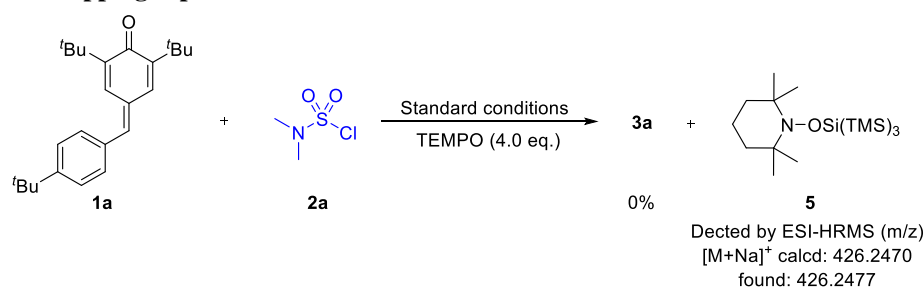

To an 8 mL vial equipped with a magnetic stir bar was added **1a** (35.0 mg, 0.1 mmol), *N,N*-dimethylsulfamoyl chloride **2a** (28.6 mg, 0.2 mmol), (TMS)<sub>3</sub>SiH (49.8 mg, 0.2 mmol), Rhodamine 6G (2.4 mg, 5.0 mol%), TEMPO (62.4 mg, 0.4 mmol) and MeCN (1.0 mL) under nitrogen atmosphere and sealed with PTFE cap. Then the reaction mixture was stirred upon 40 W blue LED (450–465 nm) at room temperature for 12 h. HRMS (ESI)  $m/z$ : compound **5**, [**5**+Na]<sup>+</sup> calcd for C<sub>18</sub>H<sub>45</sub>ONSiNa: 240.2470; Found: 240.2477.

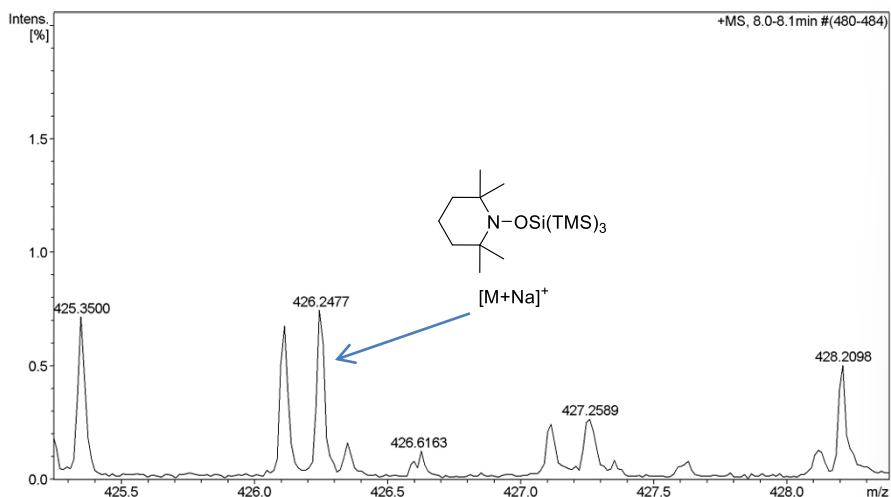

### (G) Stern-Volmer fluorescence quenching experiments

Stern-Volmer fluorescence quenching experiments were run with freshly prepared solutions of 1.25  $\mu\text{M}$  Rhodamine 6G, in degassed dry MeCN at room temperature. The solutions were irradiated at 347 nm and fluorescence was measured from 357 nm to 684 nm. Control experiments showed that the excited state Rhodamine 6G\* was mainly quenched by **1a**.

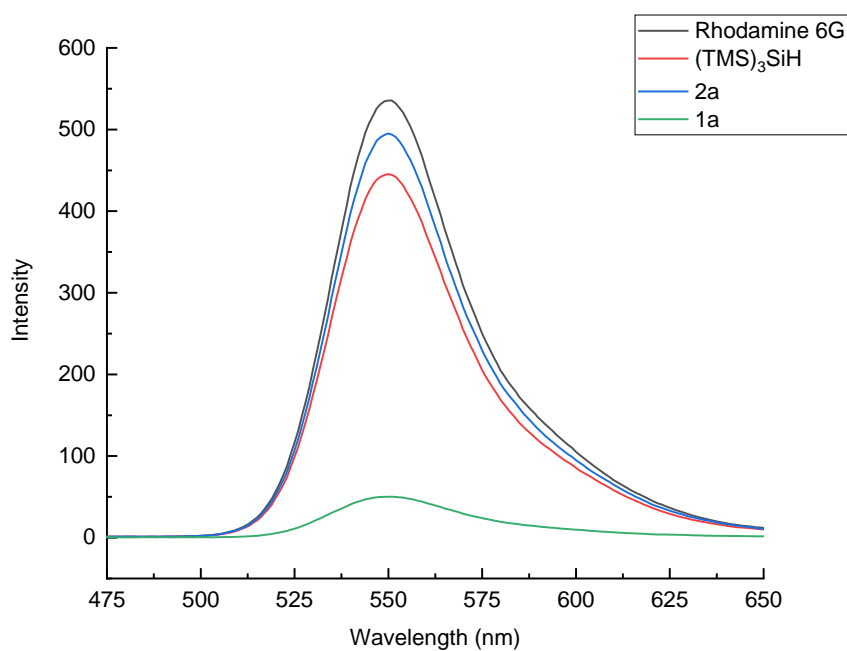

**Figure S1.** Fluorescence quenching of excited Rhodamine 6G with **1a**, **2a**,  $(\text{TMS})_3\text{SiH}$  in MeCN (excitation wavelength: 347 nm). Rhodamine 6G (1.25  $\mu\text{M}$ ) in MeCN (black line), Rhodamine 6G (1.25  $\mu\text{M}$ ) with **1a** (1.0 mM) in MeCN (green line), Rhodamine 6G (1.25  $\mu\text{M}$ ) with **2a** (1.0 mM) in MeCN (blue line), Rhodamine 6G (1.25  $\mu\text{M}$ ) with  $(\text{TMS})_3\text{SiH}$  (1.0 mM) in MeCN (red line).

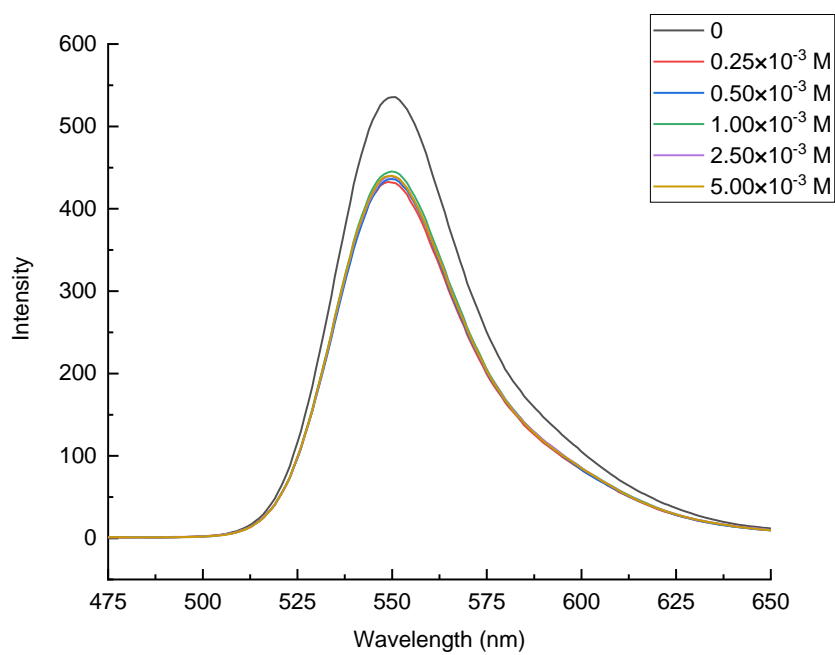

**Figure S2.** Luminescence quenching of Rhodamine 6G by  $(\text{TMS})_3\text{SiH}$  ( $10^{-3} \text{ M}$ ).

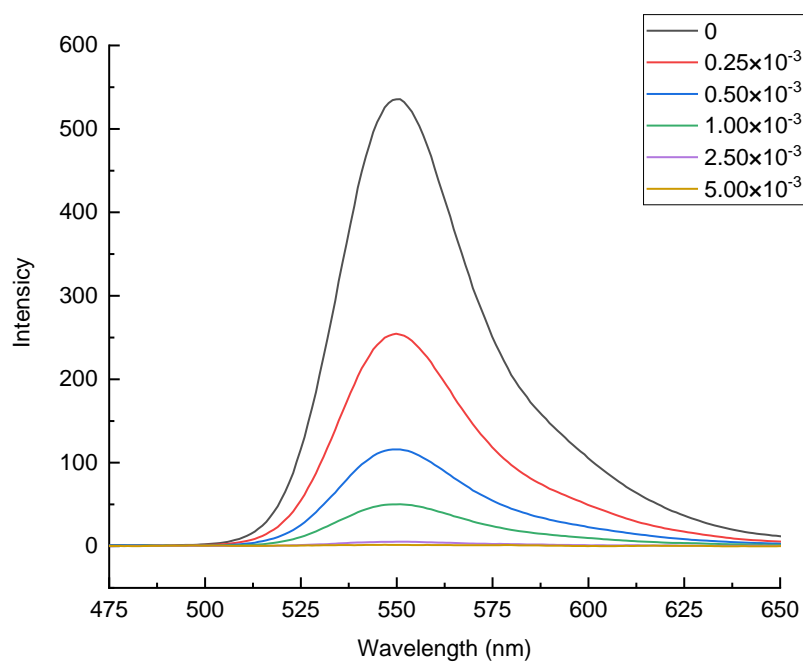

**Figure S3.** Luminescence quenching of Rhodamine 6G by **1a** ( $10^{-3} \text{ M}$ ).



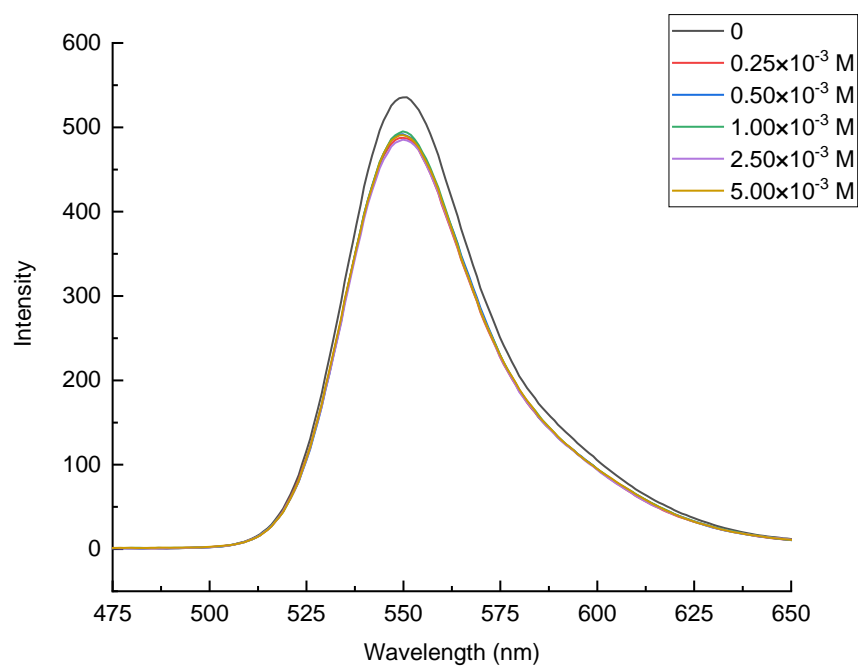

**Figure S4.** Luminescence quenching of Rhodamine 6G by **2a** ( $10^{-3}$  M).

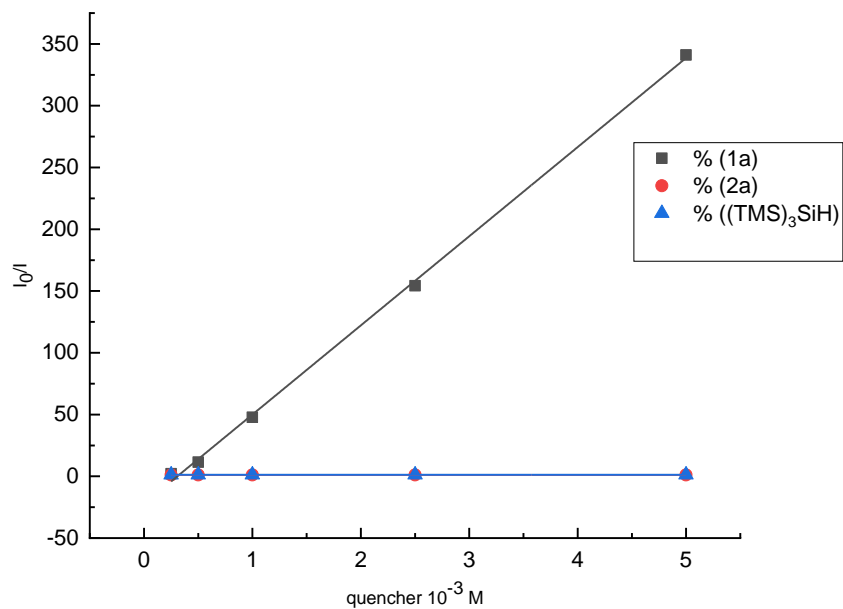

**Figure S5.** Stern-Volmer plots of Rhodamine 6G and three quenchers.  $I_0$  and  $I$  are luminescence intensities in the absence and presence of the indicated concentrations ( $10^{-3}$  M) of the corresponding quencher.

These results suggested that the excited photocatalyst Rhodamine 6G was primarily quenched by **1a**, while **2a** and  $(\text{TMS})_3\text{SiH}$  showed much less effect.

## (H) Unsuccessful examples

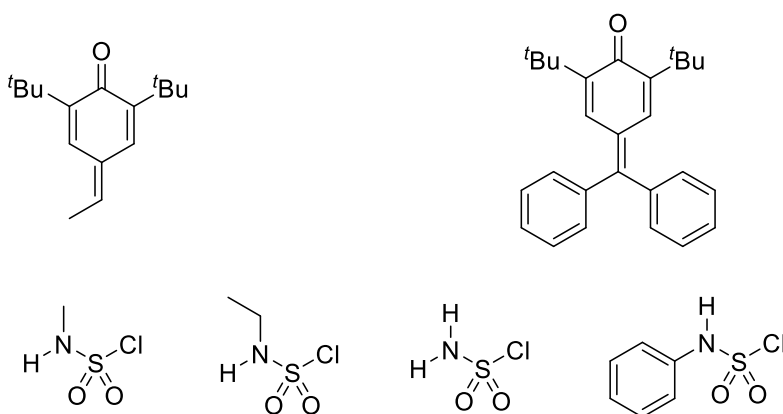

## References:

- [1] Yan, Y.; Li, H.; Xie, F.; Lu, W.; Zhang, Z.; Jing, L.; Han, P. Electrochemical Reductive Carboxylation of *para*-Quinone Methides with CO<sub>2</sub>. *Adv. Synth. Catal.* **2023**, *365*, 3830-3836
- [2] Xiong, B.; Xu, S.; Liu, Y.; Tang, K.-W.; Wong, W.-Y. Metal-Free, Acid/Phosphine-Induced Regioselective Thiolation of *p*-Quinone Methides with Sodium Aryl/Alkyl Sulfinates. *J. Org. Chem.* **2021**, *86*, 1516-1527.
- [3] Dong, N.; Zhang, Z.-P.; Xue, X.-S.; Li, X.; Cheng, J.-P. Phosphoric Acid Catalyzed Asymmetric 1,6-Conjugate Addition of Thioacetic Acid to *para*-Quinone Methides. *Angew. Chem. Int. Ed.* **2016**, *55*, 1460-1464.
- [4] Luo, C.; Lu, W.-h.; Wang, G.-q.; Zhang, Z.-b.; Li, H.-q.; Han, P.; Yang, D.; Jing, L.-h.; Wang, C. Photocatalytic Synthesis of Diarylmethyl Silanes via 1,6-Conjugate Addition of Silyl Radicals to *p*-Quinone Methides. *J. Org. Chem.* **2022**, *87*, 3567-3576.
- [5] Zhu, J.; Xu, M.; Gong, B.; Lin, A.; Gao, S. (*Z*)-Selective Synthesis of Bromofluoroalkenes via the TMSCF<sub>2</sub>Br-Mediated Tandem Reaction with *para*-Quinone Methides. *Org. Lett.* **2023**, *25*, 3271-3275.

# (I) NMR Spectra of New Compounds

yd-4-18-H.10.fid

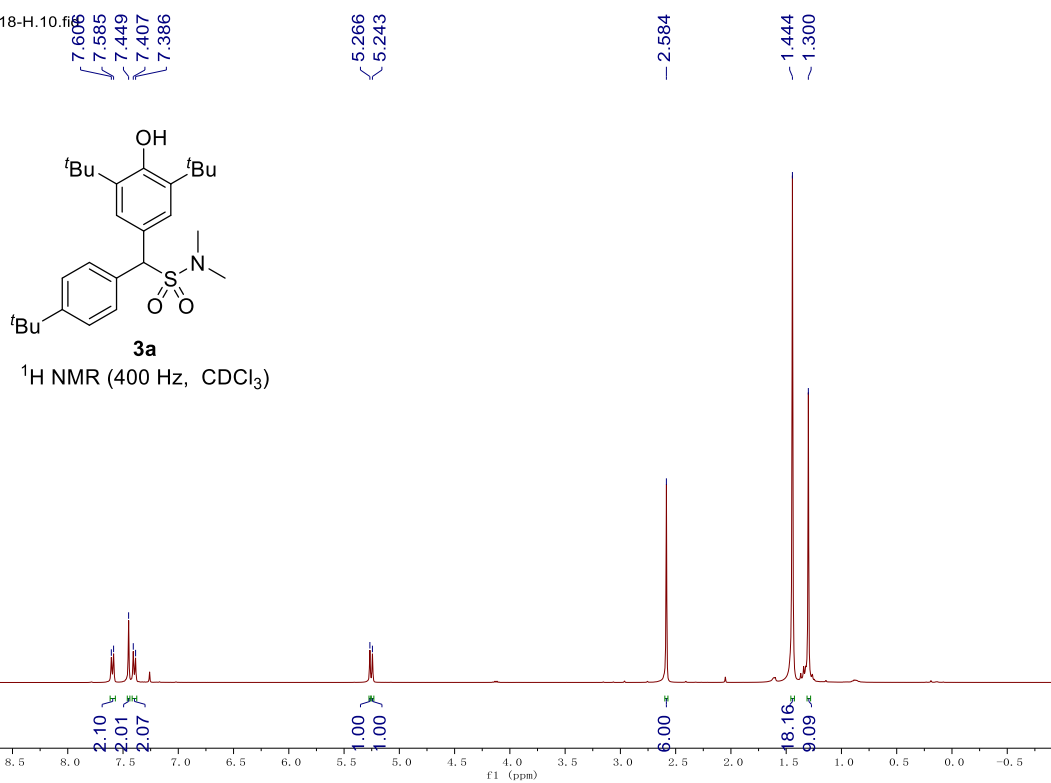

yd-4-18-C.11.fid

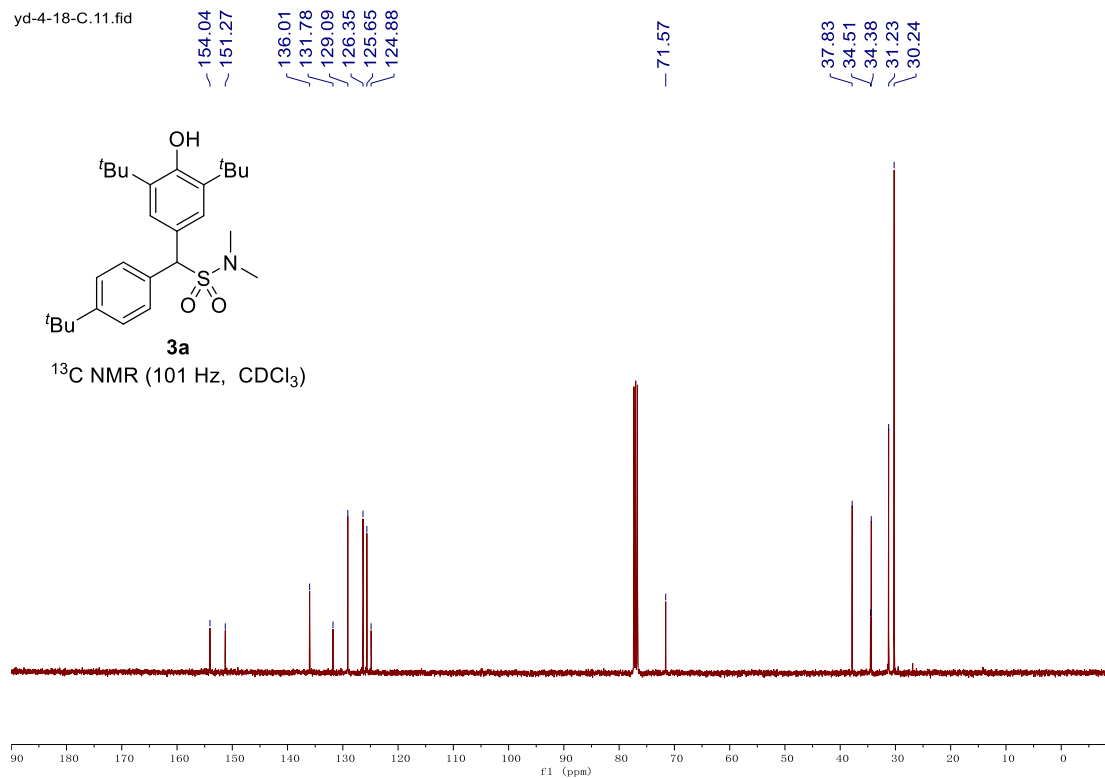

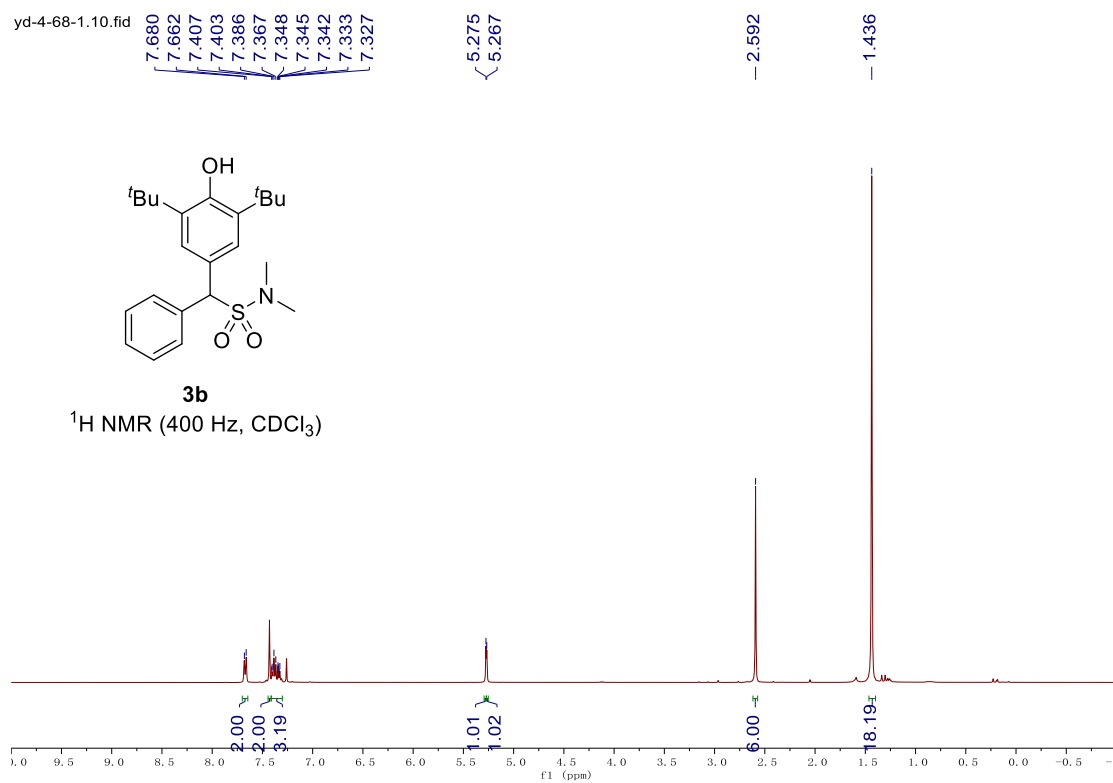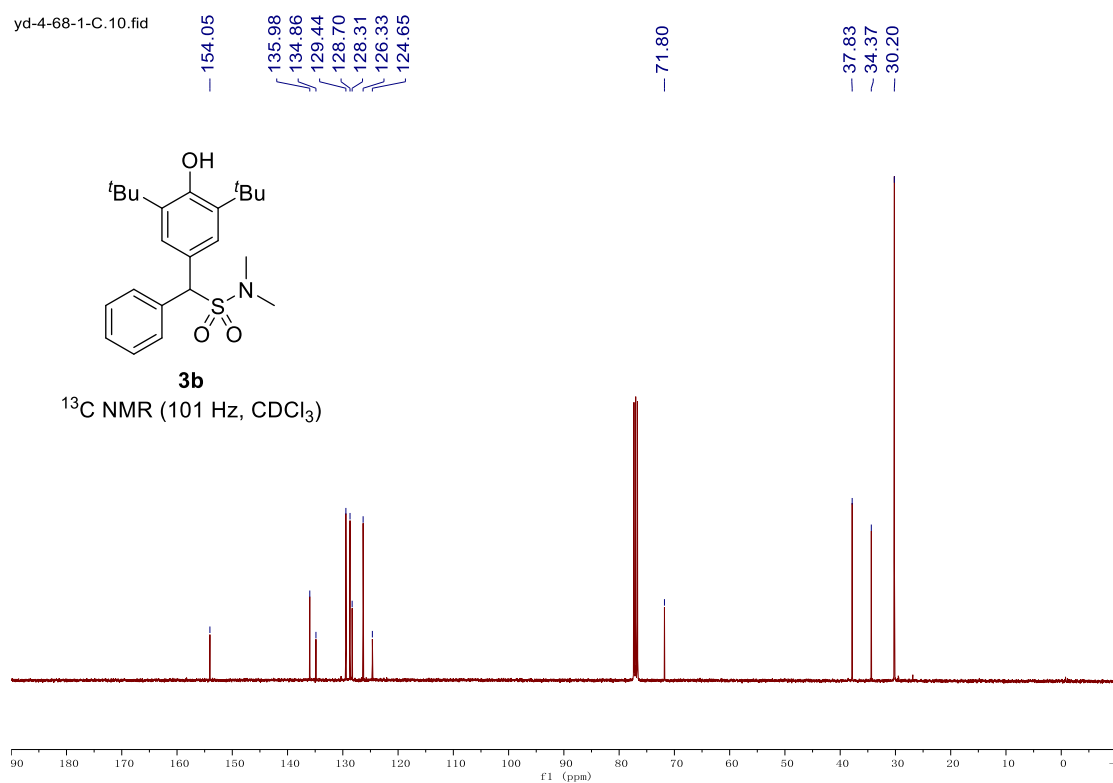

yd-4-72-2-H2.10.fid

7.565  
7.545  
7.426  
7.201  
7.181

5.260  
5.238

2.594  
2.338

1.437

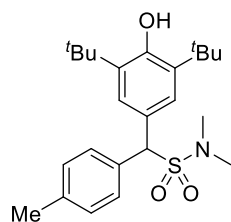

**3c**

<sup>1</sup>H NMR (400 Hz, CDCl<sub>3</sub>)

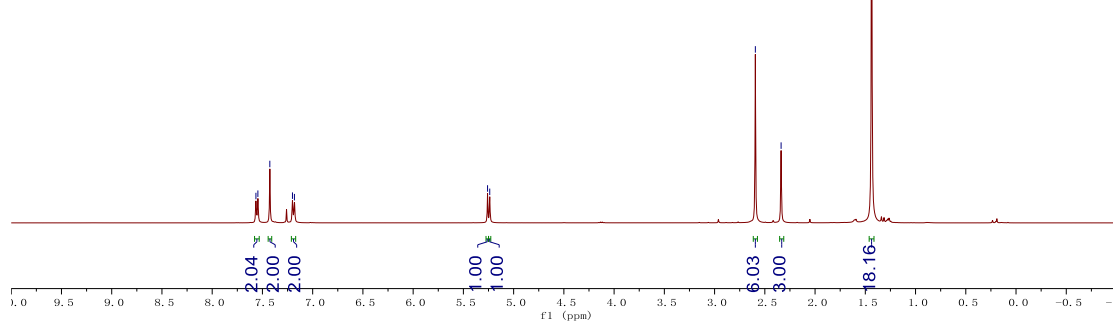

yd-4-72-2-C1.10.fid

153.99  
138.14  
135.98  
131.90  
129.38  
129.33  
126.29  
124.92

71.57

37.86  
34.37  
30.23  
21.08

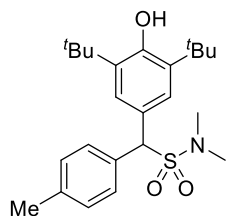

**3c**

<sup>13</sup>C NMR (101 Hz, CDCl<sub>3</sub>)

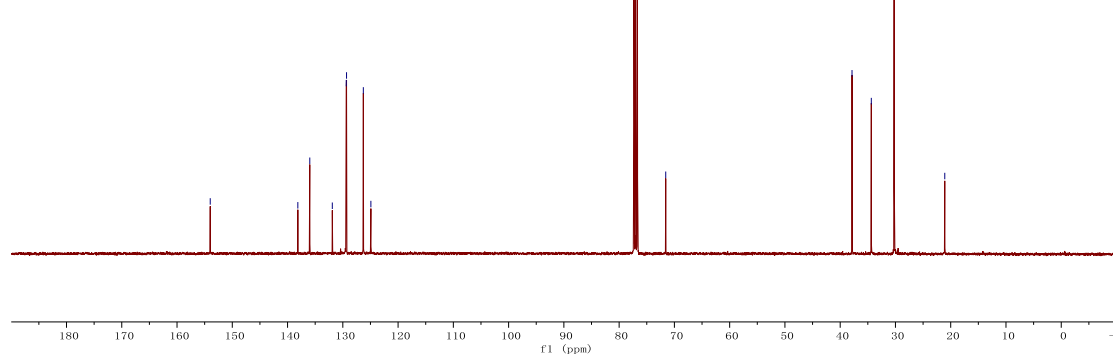

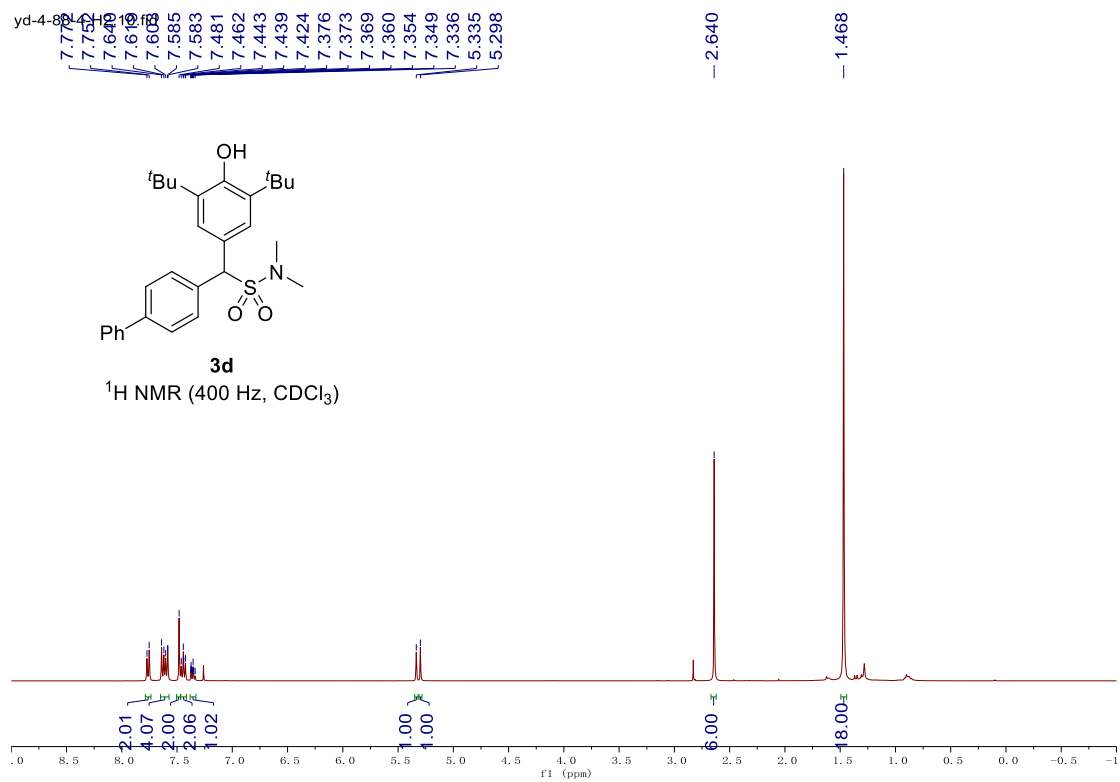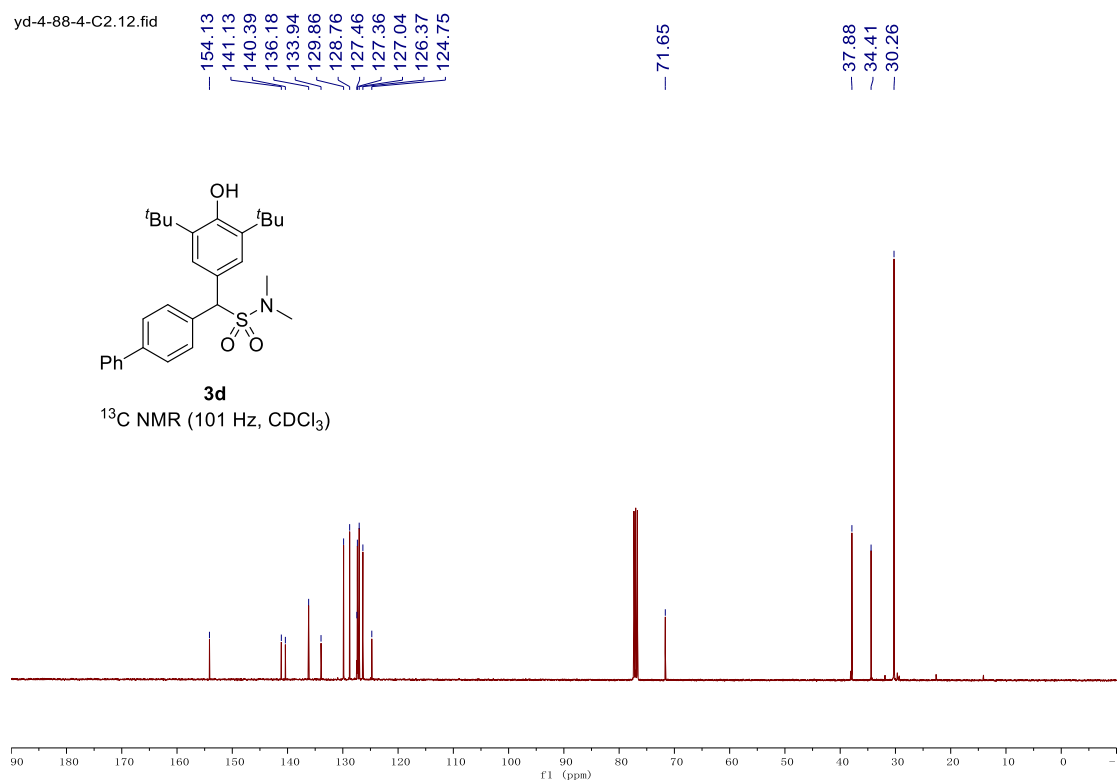

yd-4-70-3-H1.10.fid

7.598  
7.571  
7.412  
6.922  
6.900

5.261  
5.224

3.799

2.593

1.435

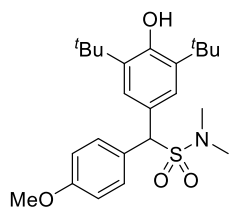

**3e**

<sup>1</sup>H NMR (400 Hz, CDCl<sub>3</sub>)

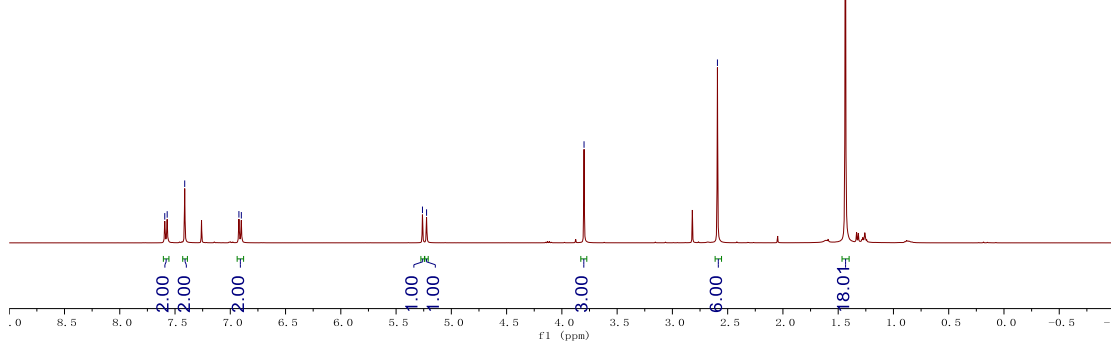

yd-4-70-3-C2.10.fid

159.54  
153.98  
136.00  
130.68  
126.95  
126.27  
125.00

114.07

71.17

55.26

37.86  
34.39  
30.24

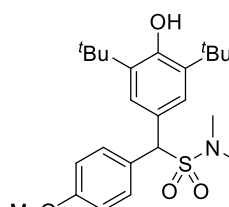

**3e**

<sup>13</sup>C NMR (101 Hz, CDCl<sub>3</sub>)

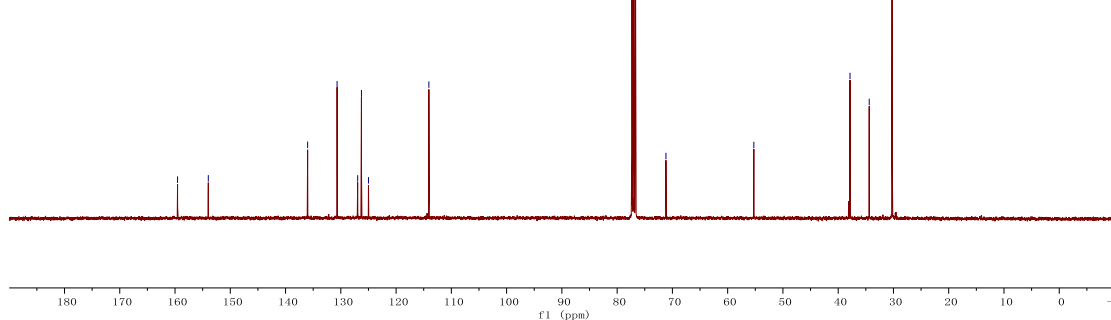

yd-4-71-3-H.10.fid

7.664  
7.660  
7.651  
7.643  
7.634  
7.629  
7.386  
7.095  
7.090  
7.073  
7.057  
7.051  
5.298  
5.254

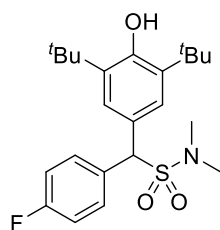

**3f**

<sup>1</sup>H NMR (400 Hz, CDCl<sub>3</sub>)

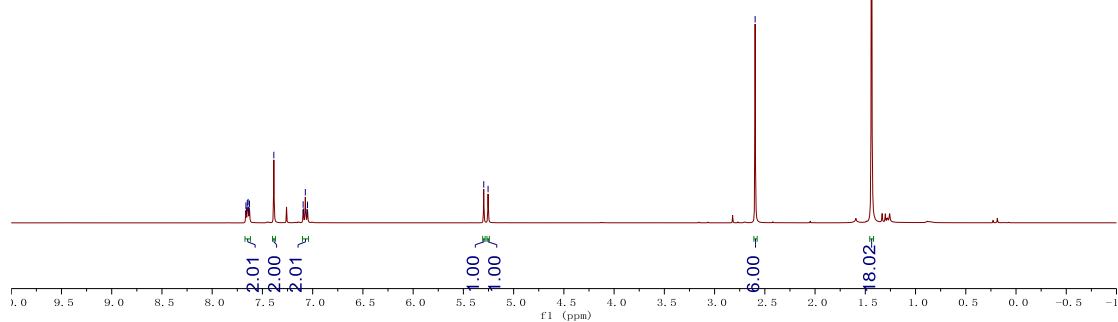

yd-4-71-3-C.12.fid

163.84  
161.37  
154.16  
136.20  
131.23  
131.15  
130.85  
130.81  
126.27  
124.52  
115.73  
115.52  
71.01  
37.83  
34.41  
30.22

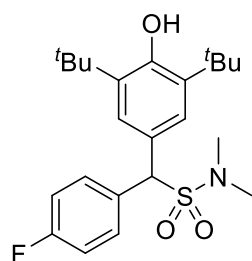

**3f**

<sup>13</sup>C NMR (101 Hz, CDCl<sub>3</sub>)

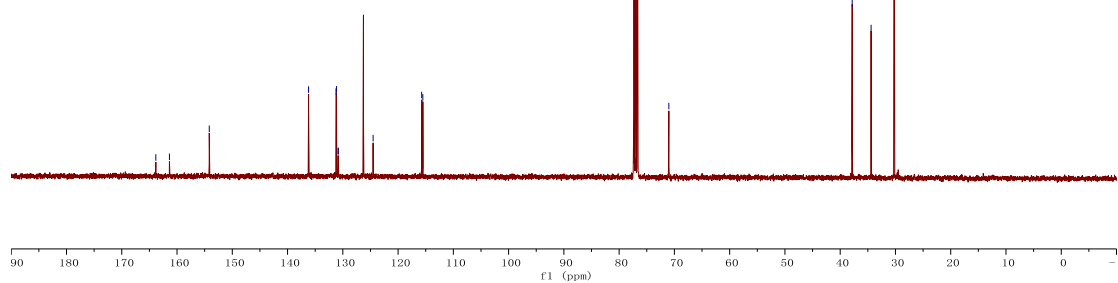



yd-4-71-3-F.10.fid

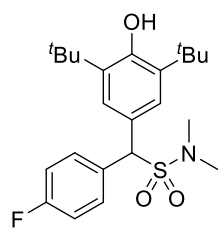

**3f**

<sup>19</sup>F NMR (376 Hz, CDCl<sub>3</sub>)

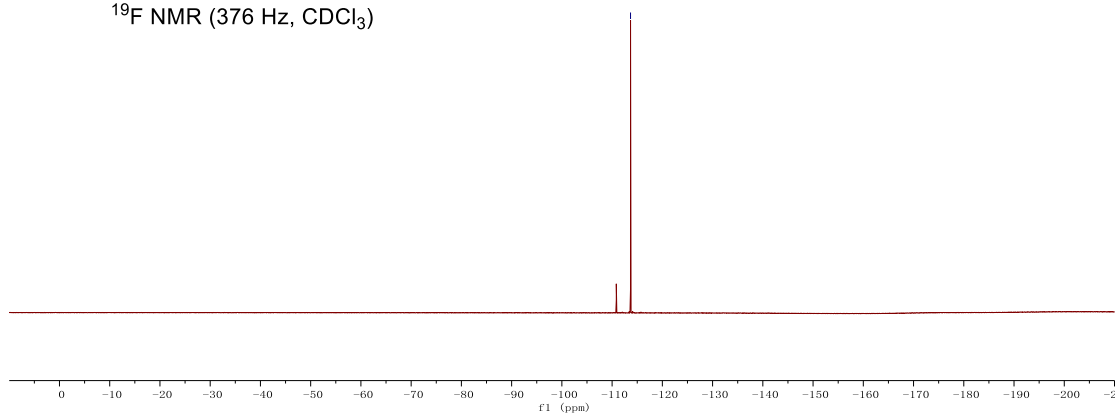

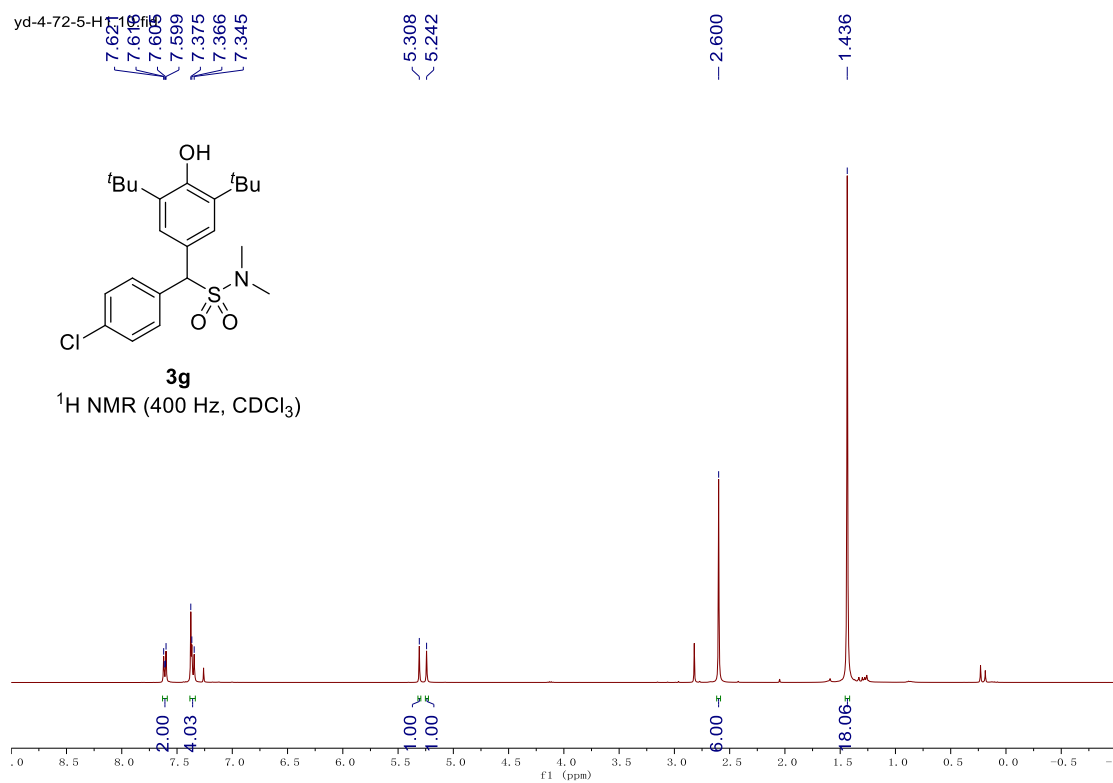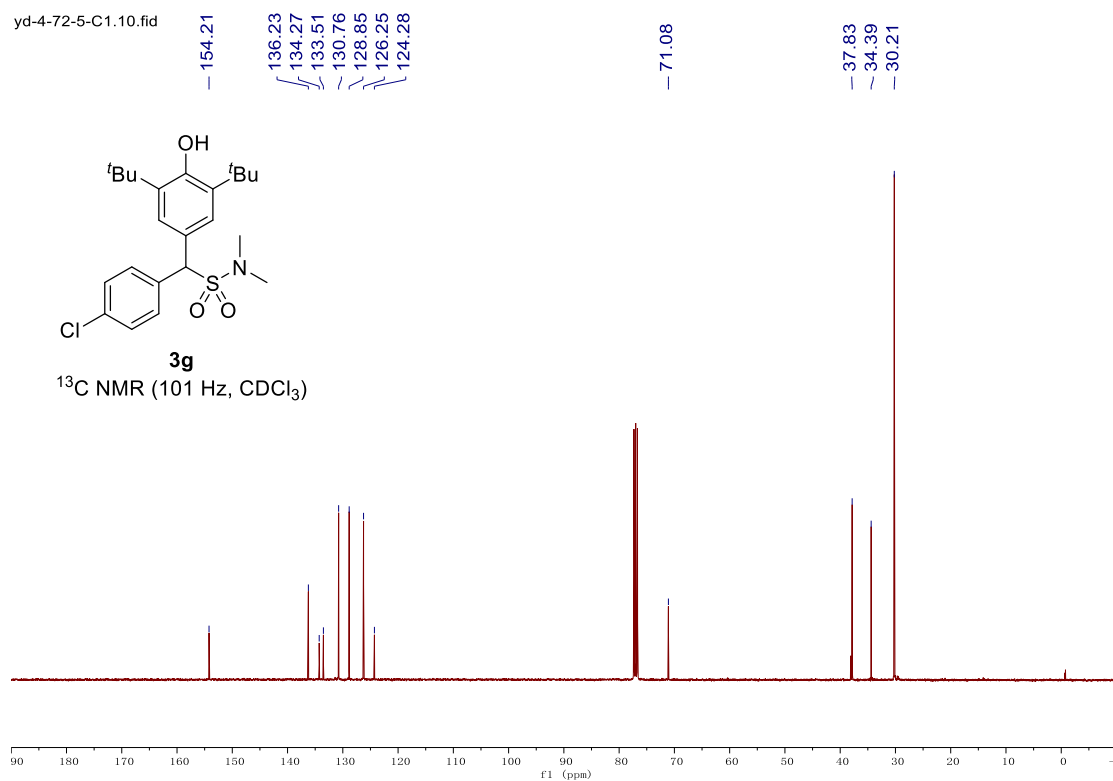

yd-4-72-6-H1.10

7.539  
7.536  
7.517  
7.501  
7.496  
7.368

5.303  
5.221

2.598

1.433

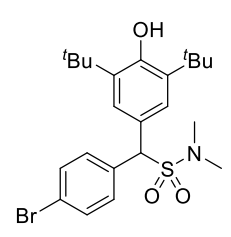

**3h**

<sup>1</sup>H NMR (400 Hz, CDCl<sub>3</sub>)

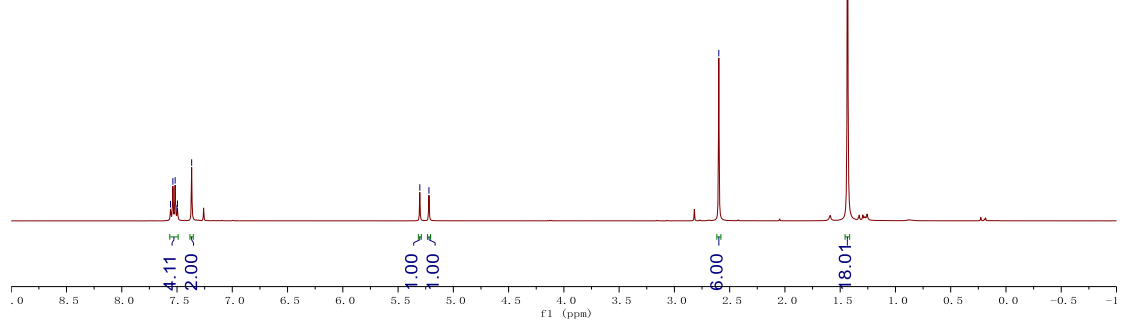

yd-4-72-6-C1.10.fid

154.23  
136.24  
134.04  
131.82  
131.07  
126.25  
124.21  
122.49

71.17

37.85  
34.40  
30.22

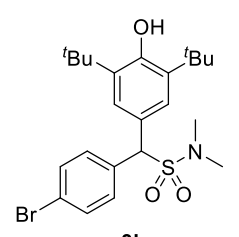

**3h**

<sup>13</sup>C NMR (101 Hz, CDCl<sub>3</sub>)

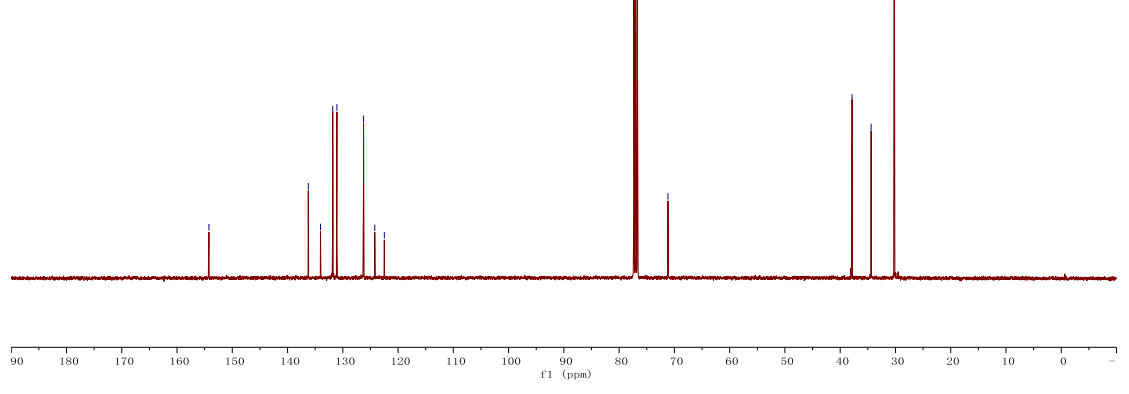

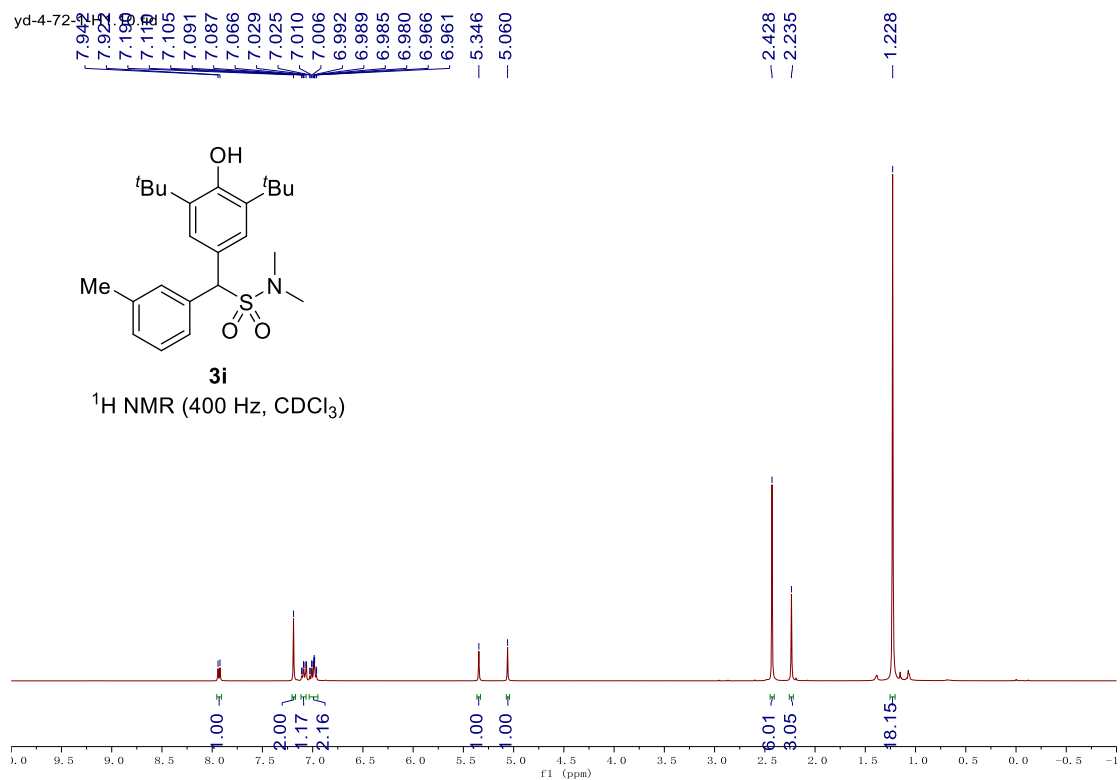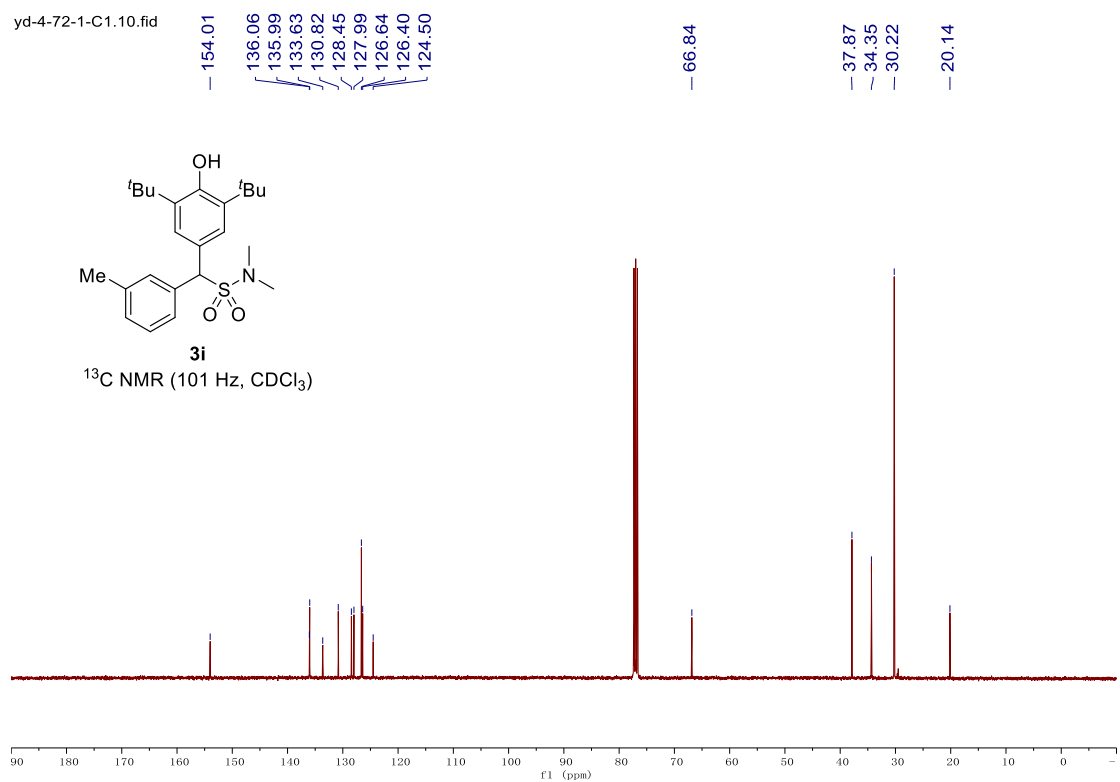

70-2-240301-H

7.336  
7.237  
7.217  
7.197  
7.183  
7.177  
7.170  
7.165  
7.159  
6.807  
6.802  
6.798  
6.788  
6.785  
6.781  
6.778  
5.198  
5.158

3.745

2.533

1.362

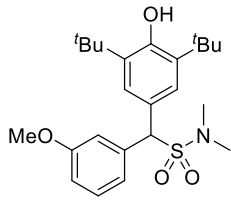

**3j**

<sup>1</sup>H NMR (400 Hz, CDCl<sub>3</sub>)

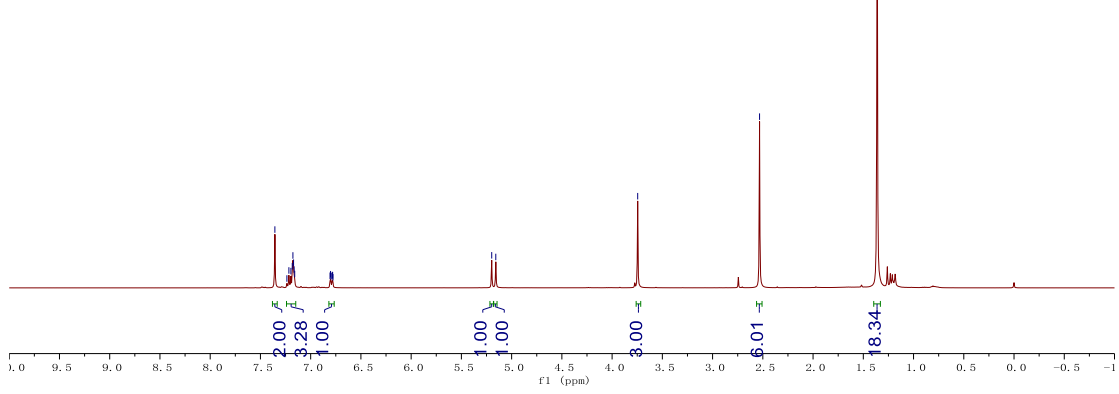

yd-4-70-2-1-C.12.fid

159.62  
154.06  
136.26  
136.00  
129.60  
126.31  
124.64  
121.78  
114.92  
114.00

71.68

55.18

37.84

34.36

30.20

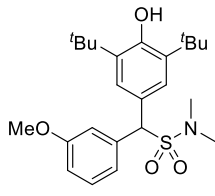

**3j**

<sup>13</sup>C NMR (101 Hz, CDCl<sub>3</sub>)

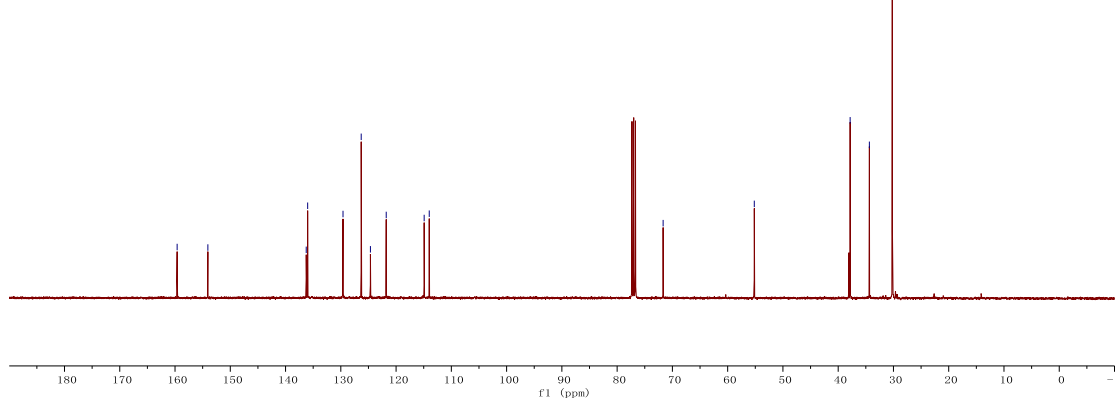

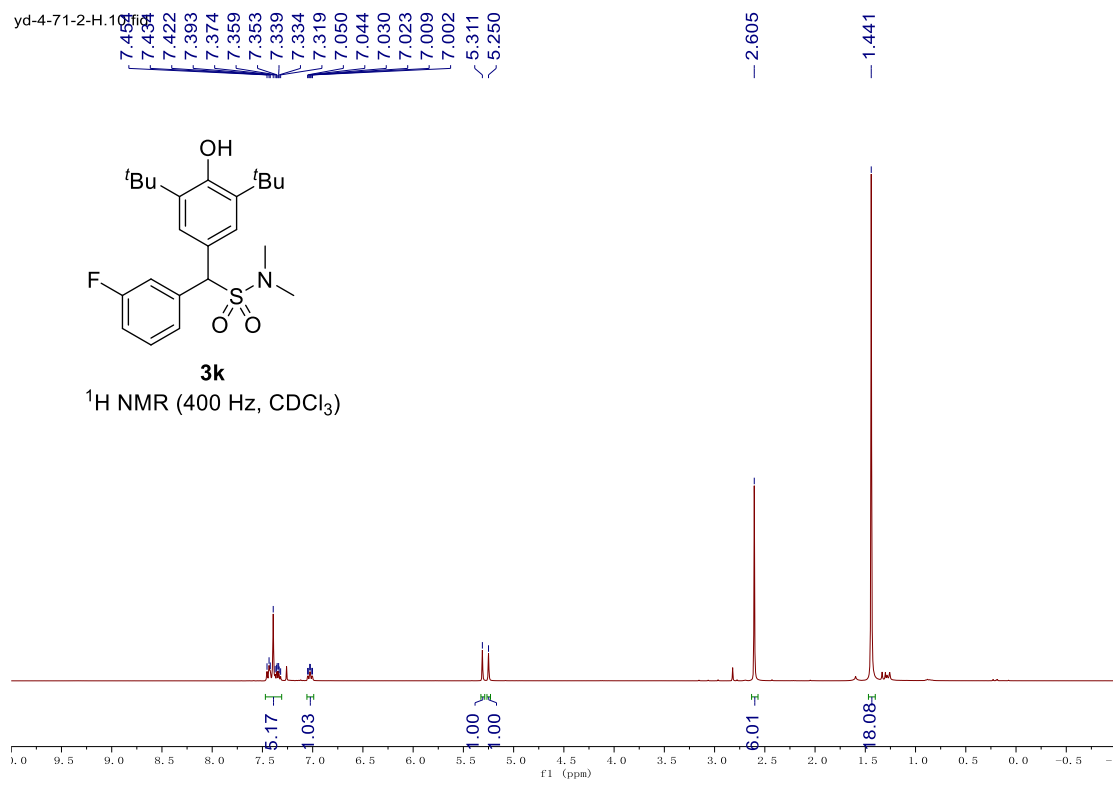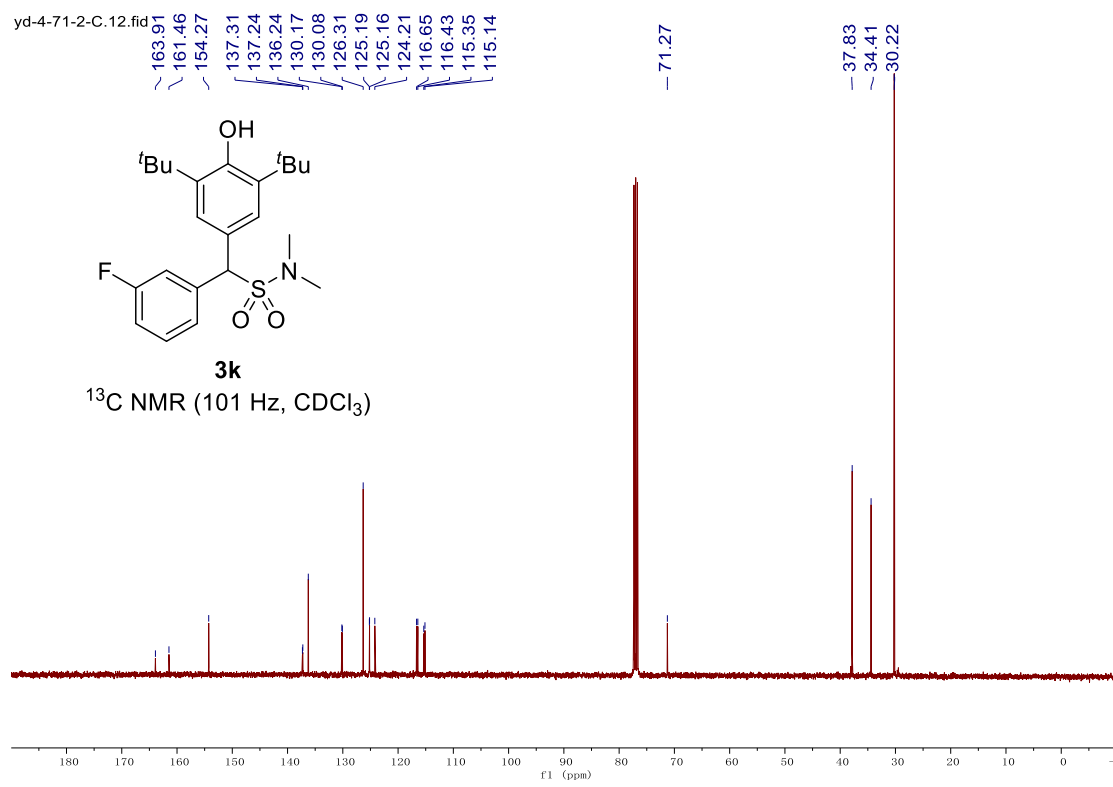

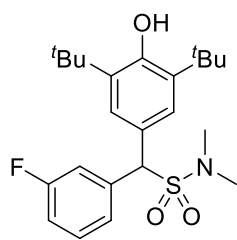

**3k**

$^{19}\text{F}$  NMR (376 Hz,  $\text{CDCl}_3$ )

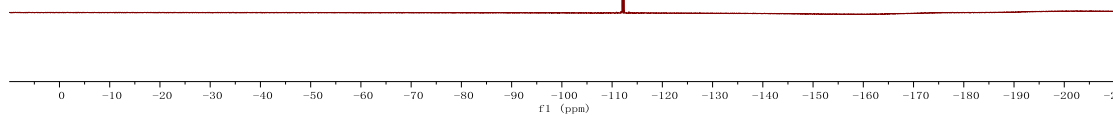

yd-4-68-2-H.10.fid

7.959  
7.939  
7.204  
7.120  
7.116  
7.099  
7.083  
7.079  
7.064  
7.035  
7.016  
7.001  
6.995  
6.989  
6.974  
6.970  
5.358  
5.089

-2.436  
-2.247

-1.237

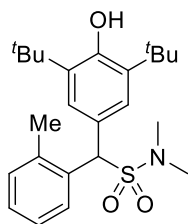

**3l**

<sup>1</sup>H NMR (400 Hz, CDCl<sub>3</sub>)

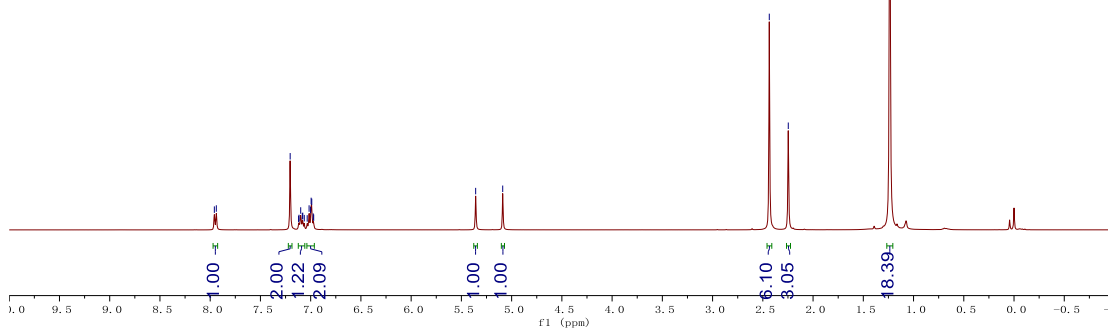

yd-4-68-2-C.12.fid

153.97  
136.01  
135.90  
133.55  
130.80  
128.36  
127.96  
126.59  
126.37  
124.38

-66.71

-37.84  
-34.30

-30.16

-20.14

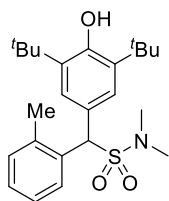

**3l**

<sup>13</sup>C NMR (101 Hz, CDCl<sub>3</sub>)

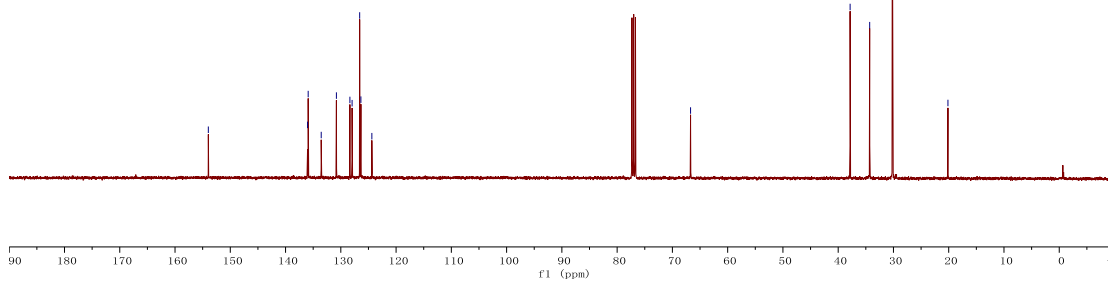



yd-4-70-1-H2.10.fid

7.593  
7.571  
7.413  
6.922  
6.900

5.260  
5.224

3.800

2.593

1.436

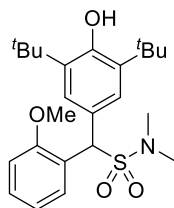

**3m**

<sup>1</sup>H NMR (400 Hz, CDCl<sub>3</sub>)

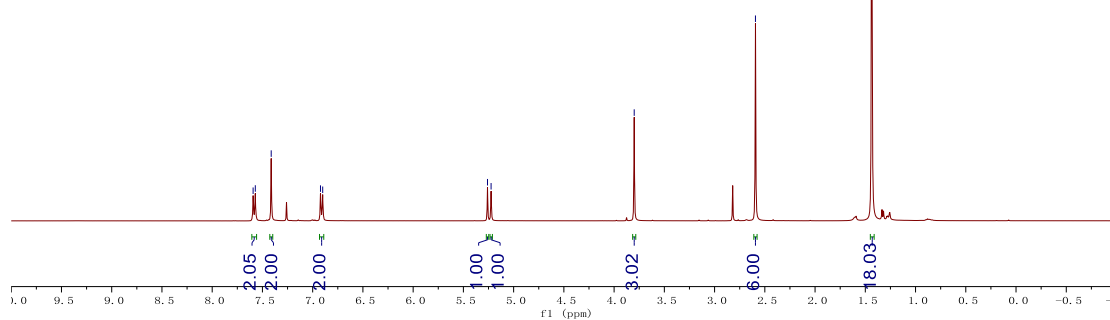

yd-4-70-1-C.12.fid

156.49  
153.83

135.76  
129.91  
129.23  
126.58  
125.12  
123.61  
120.77  
110.75

61.72  
55.74

37.80  
34.35  
30.24

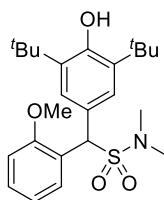

**3m**

<sup>13</sup>C NMR (101 Hz, CDCl<sub>3</sub>)

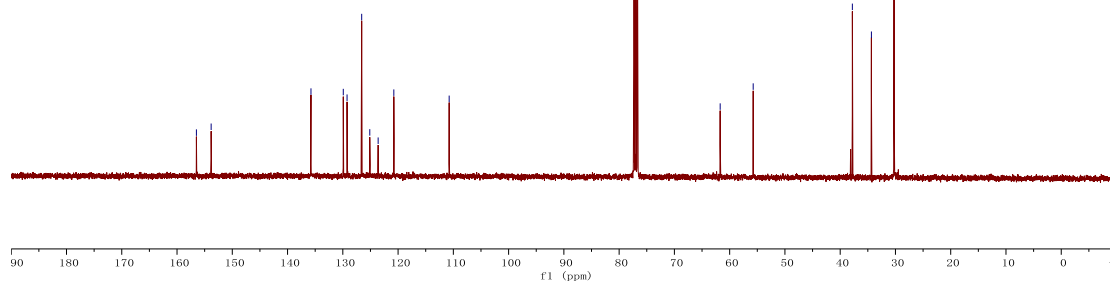

yd-4-71-1-H1.13.fid

8.079  
8.060  
8.041  
7.432  
7.331  
7.327  
7.318  
7.313  
7.308  
7.299  
7.293  
7.288  
7.279  
7.275  
7.232  
7.229  
7.213  
7.209  
7.194  
7.191  
7.106  
7.103  
7.086  
7.081  
7.077  
7.060  
7.057  
5.737  
5.284  
2.635

1.437

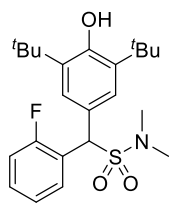

**3n**

<sup>1</sup>H NMR (400 Hz, CDCl<sub>3</sub>)

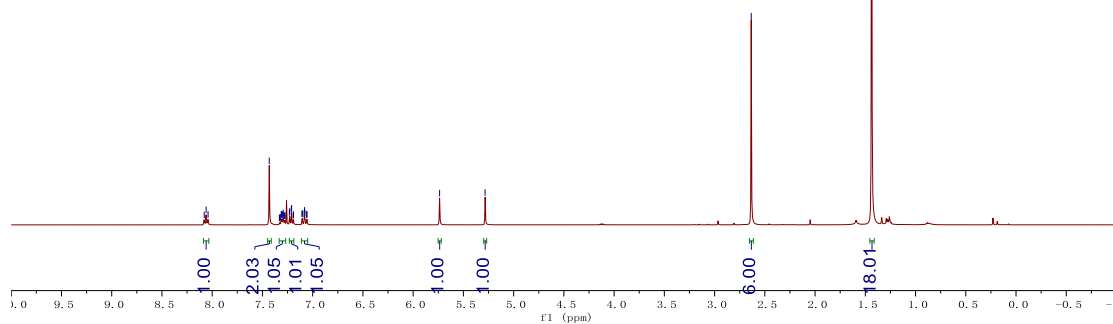

yd-4-71-1-2F-C1.10

161.49  
159.04  
154.16  
136.18  
130.31  
130.29  
129.85  
129.76  
126.45  
124.42  
124.39  
124.31  
122.86  
122.72  
115.60  
115.37

61.99  
61.95

37.73  
34.40

30.23

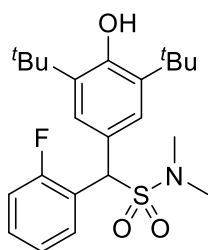

**3n**

<sup>13</sup>C NMR (101 Hz, CDCl<sub>3</sub>)

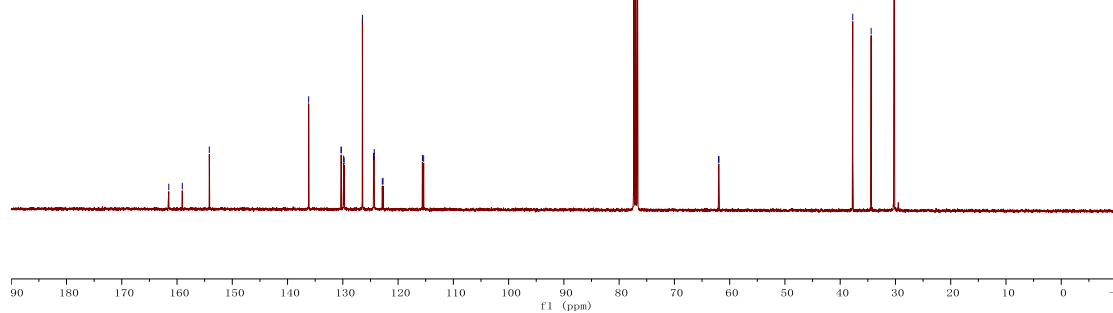

yd-4-71-1-F.10.fid

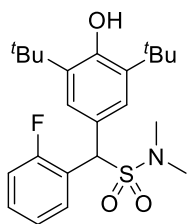

**3n**

<sup>19</sup>F NMR (376 Hz, CDCl<sub>3</sub>)

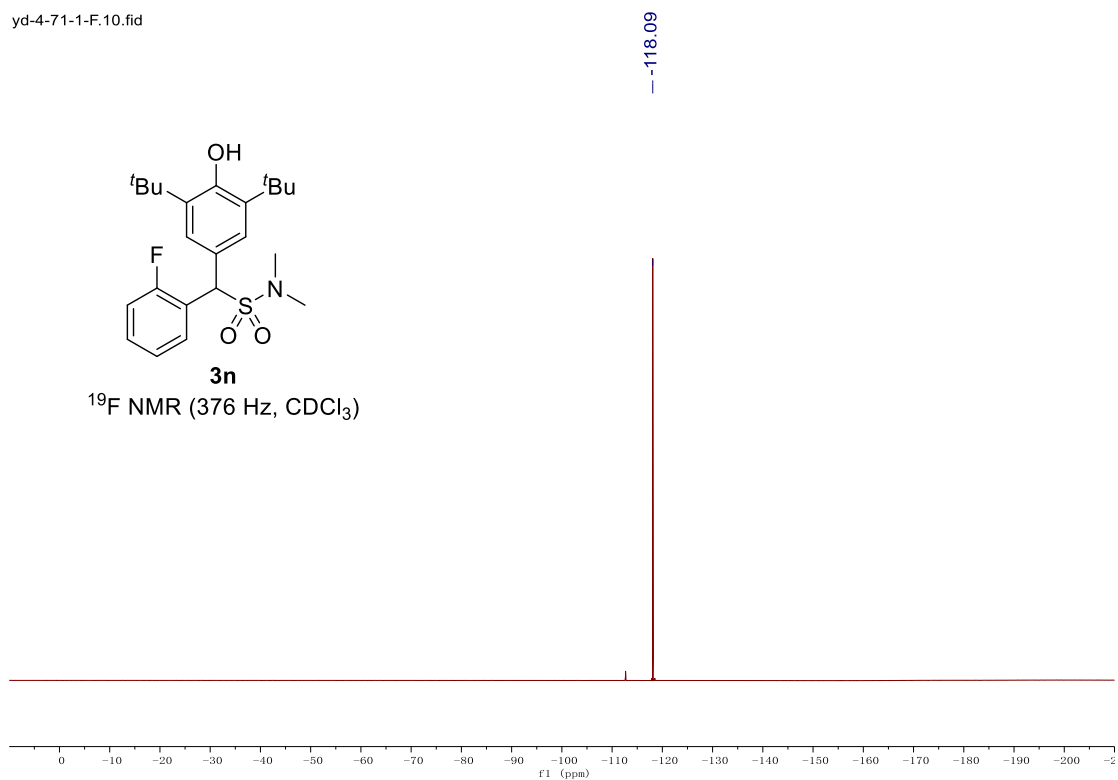

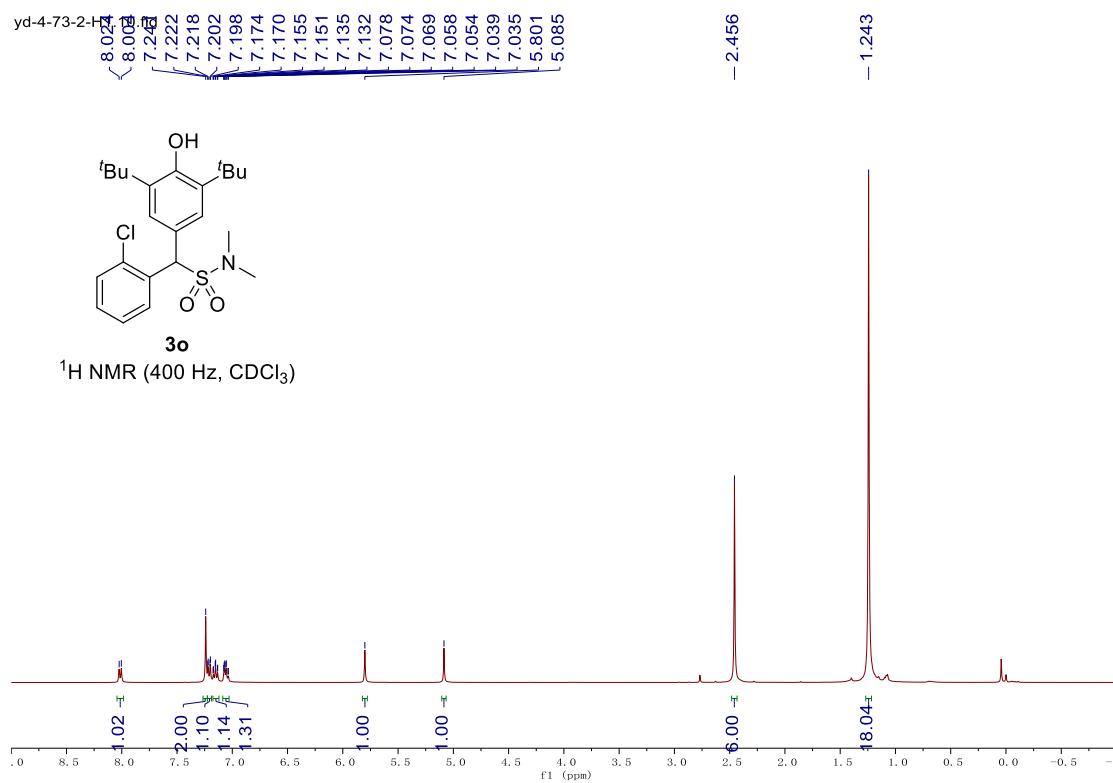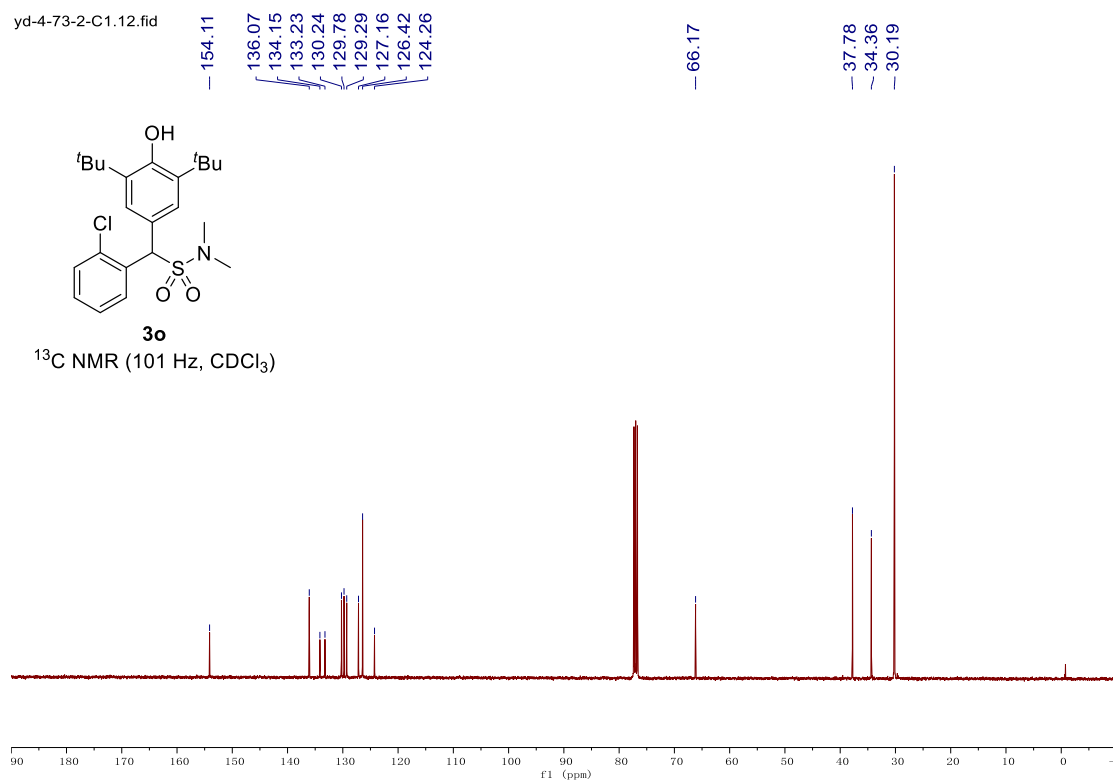

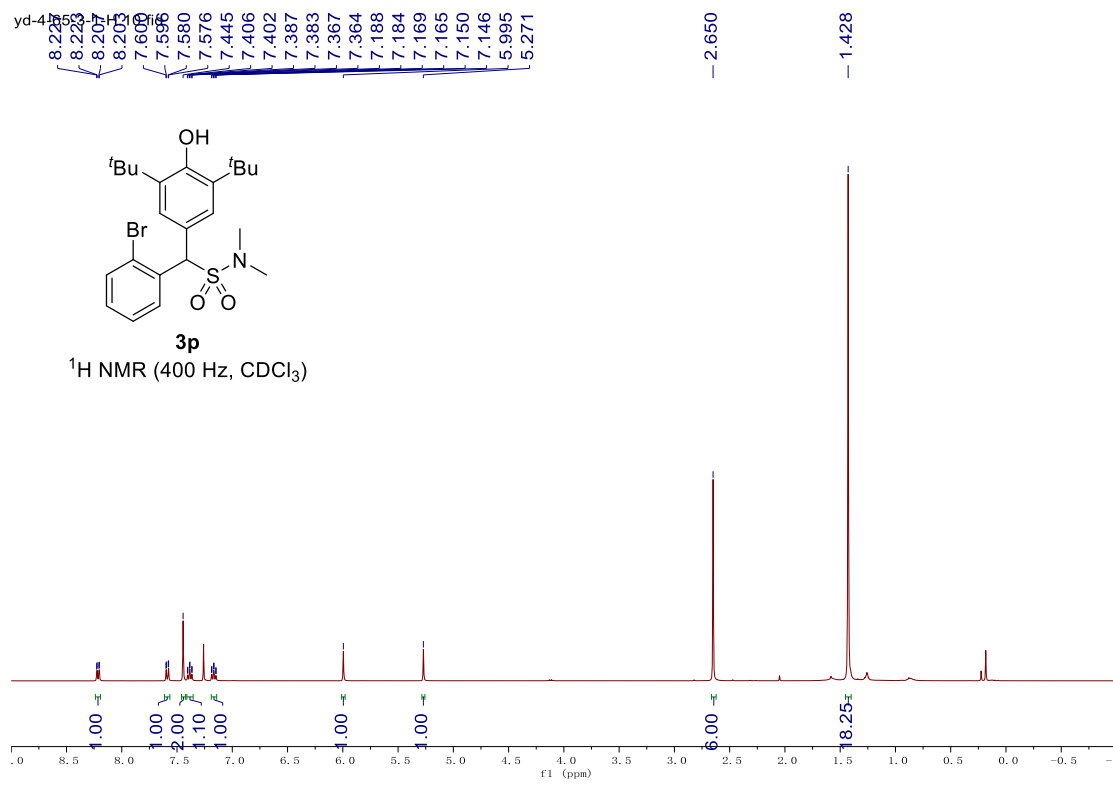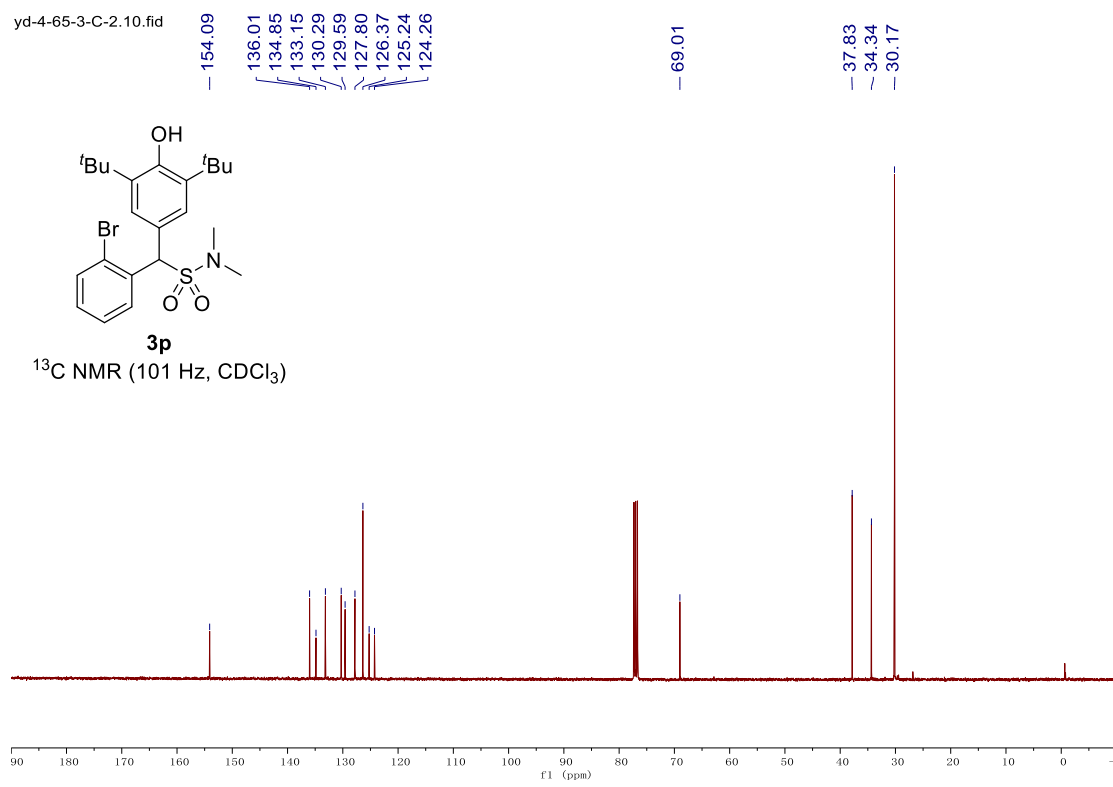

yd-4-67-4-H.10.fid

7.430  
6.854  
6.848  
6.424  
6.419  
6.413  
5.282  
5.175  
3.801  
2.624  
1.435

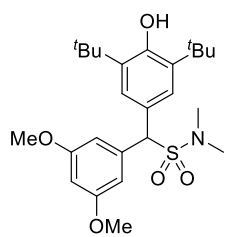

**3q**

<sup>1</sup>H NMR (400 Hz, CDCl<sub>3</sub>)

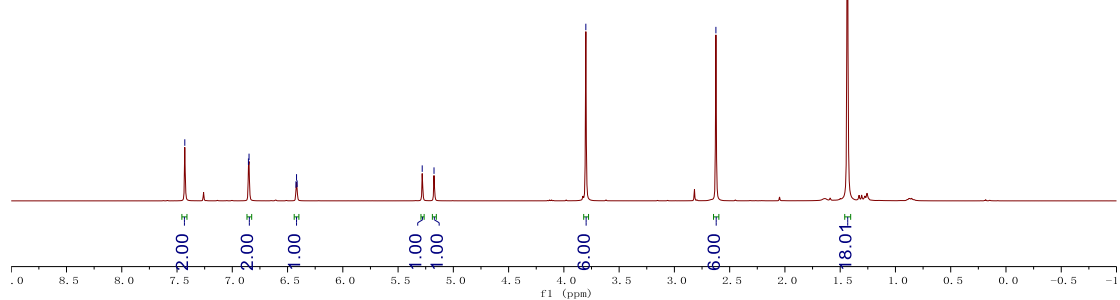

yd-4-67-4-C.12.fid

160.72  
154.10  
136.86  
135.95  
126.31  
124.53  
107.49  
100.41  
71.68  
55.33  
37.90  
34.37  
30.21

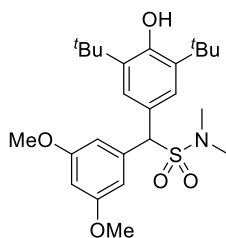

**3q**

<sup>13</sup>C NMR (101 Hz, CDCl<sub>3</sub>)

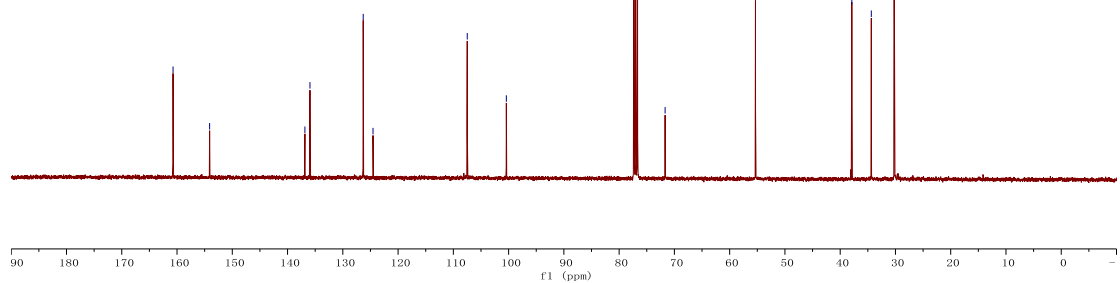

yd-4-67-5-H.10.fid

7.437

6.935

5.305

5.173

3.891

3.826

2.614

1.442

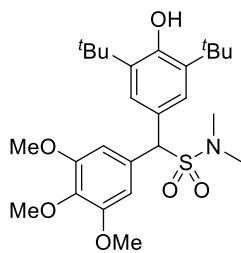

**3r**

<sup>1</sup>H NMR (400 Hz, CDCl<sub>3</sub>)

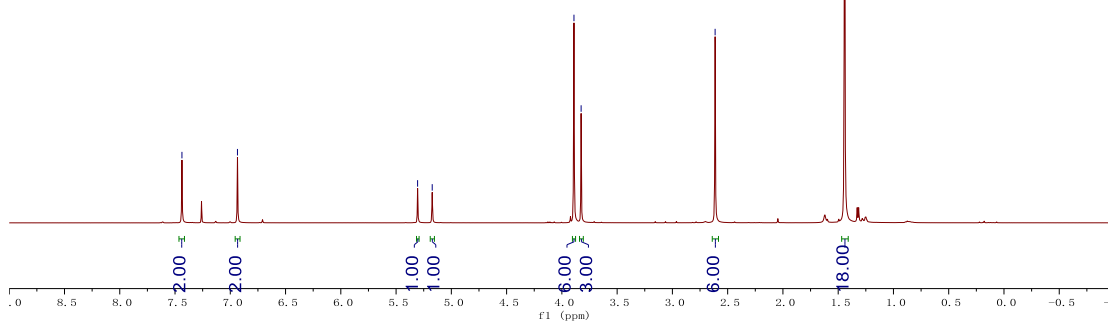

yd-4-67-5-C.12.fid

154.20

153.12

137.92

136.07

130.18

126.32

124.49

106.55

71.68

60.82

56.05

37.88

34.41

30.22

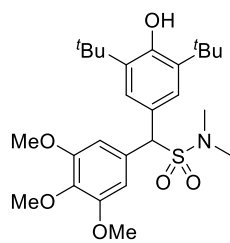

**3r**

<sup>13</sup>C NMR (101 Hz, CDCl<sub>3</sub>)

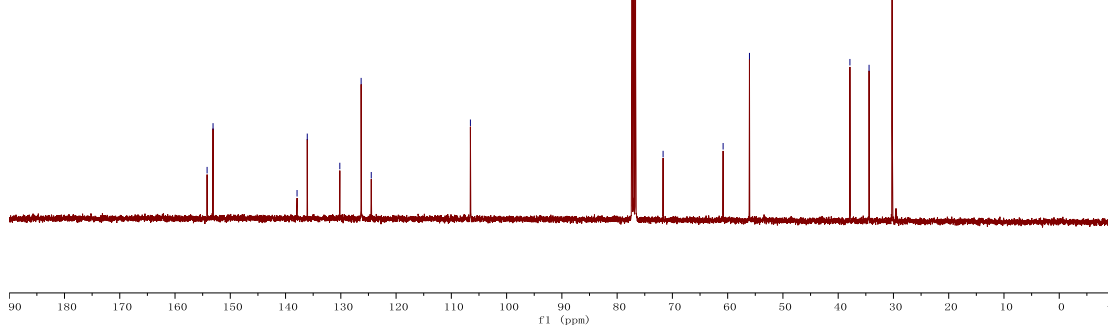

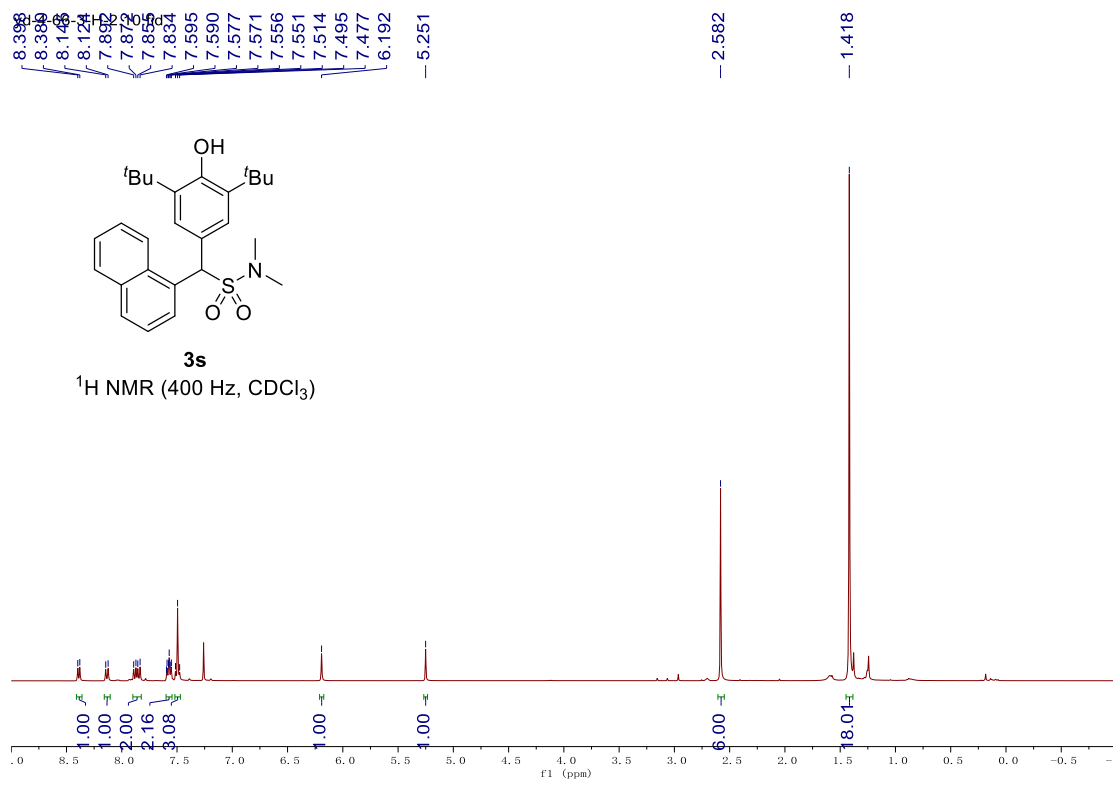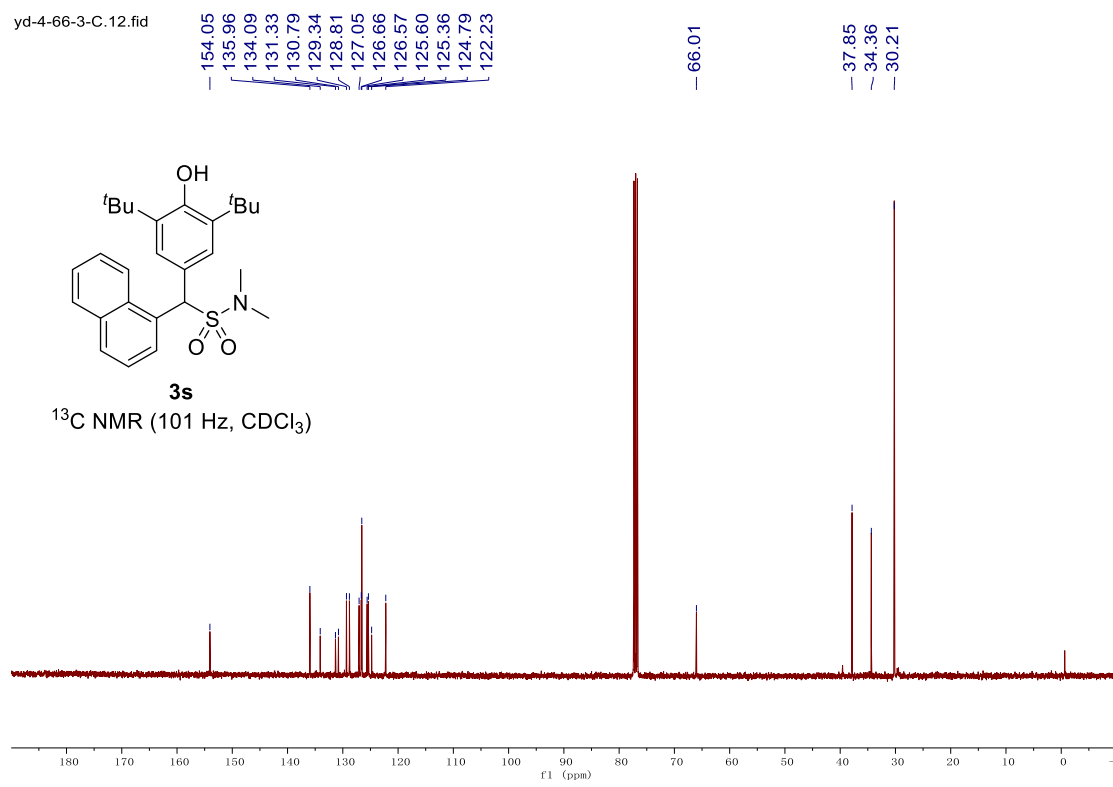



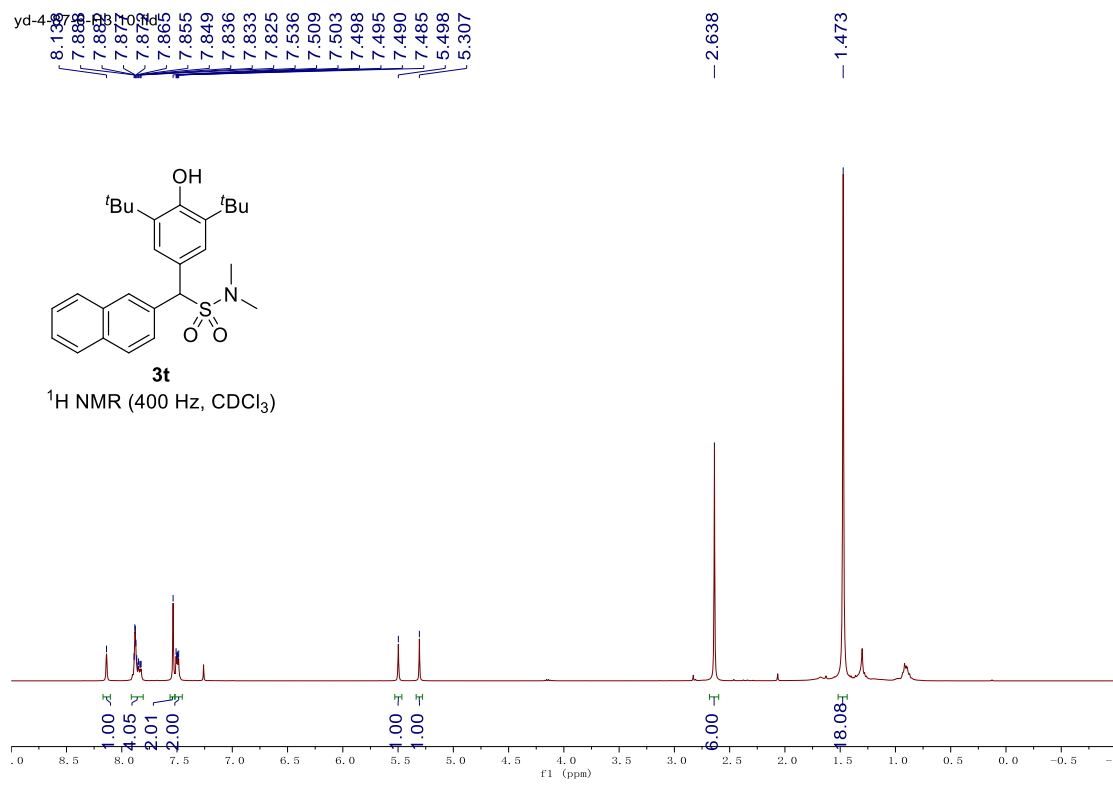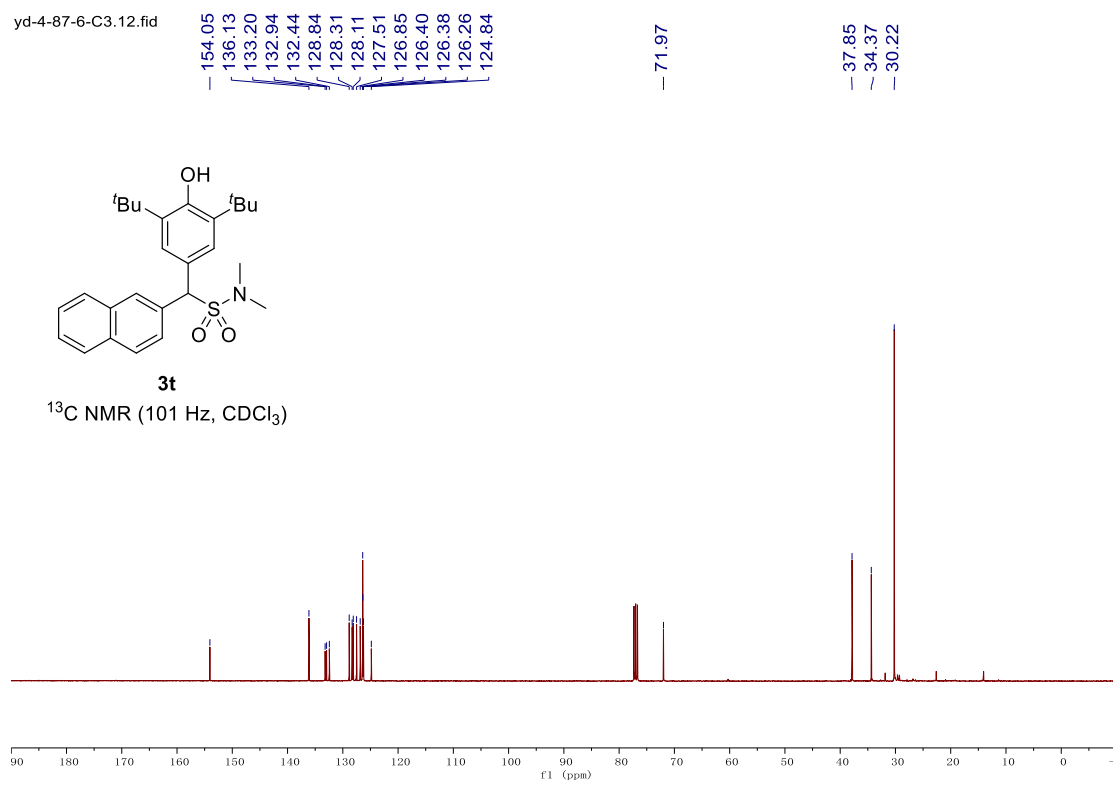

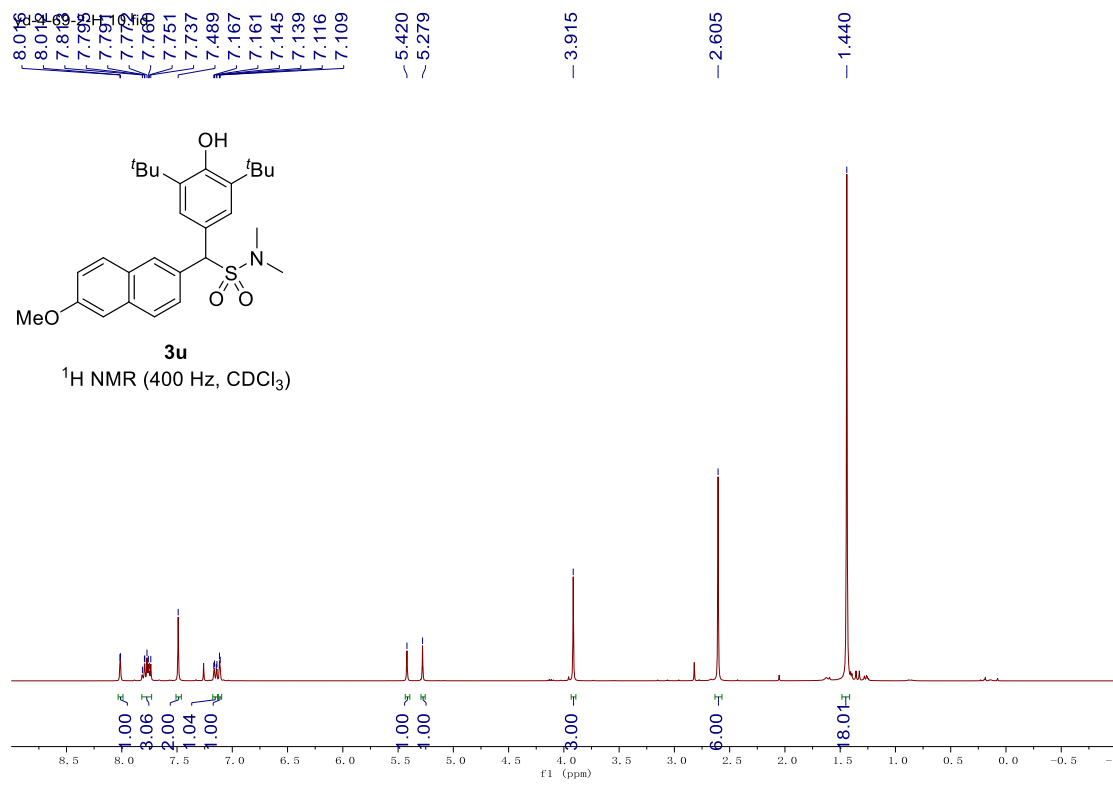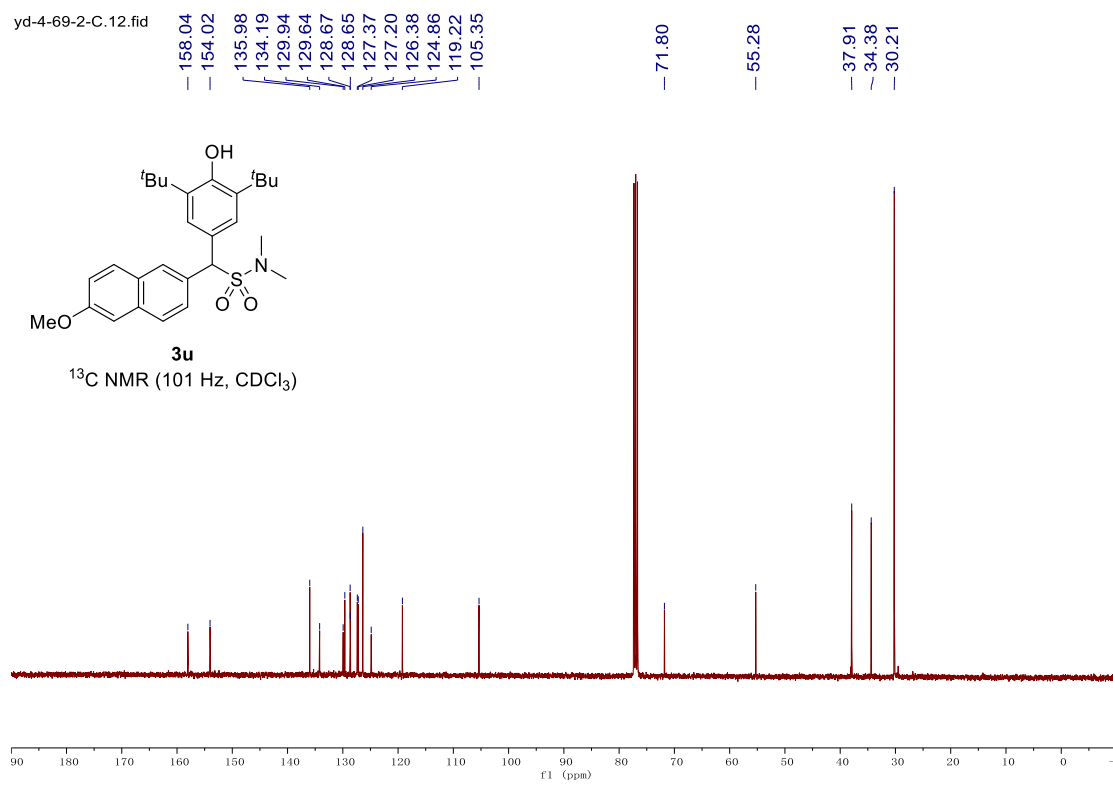

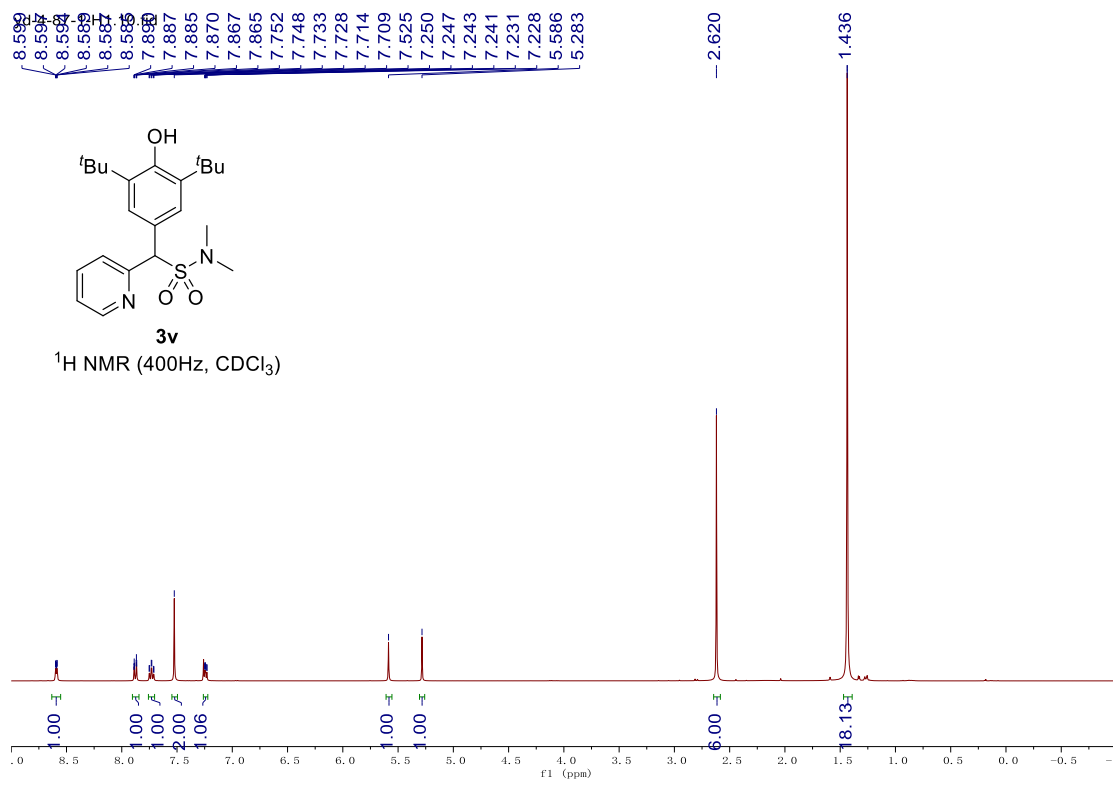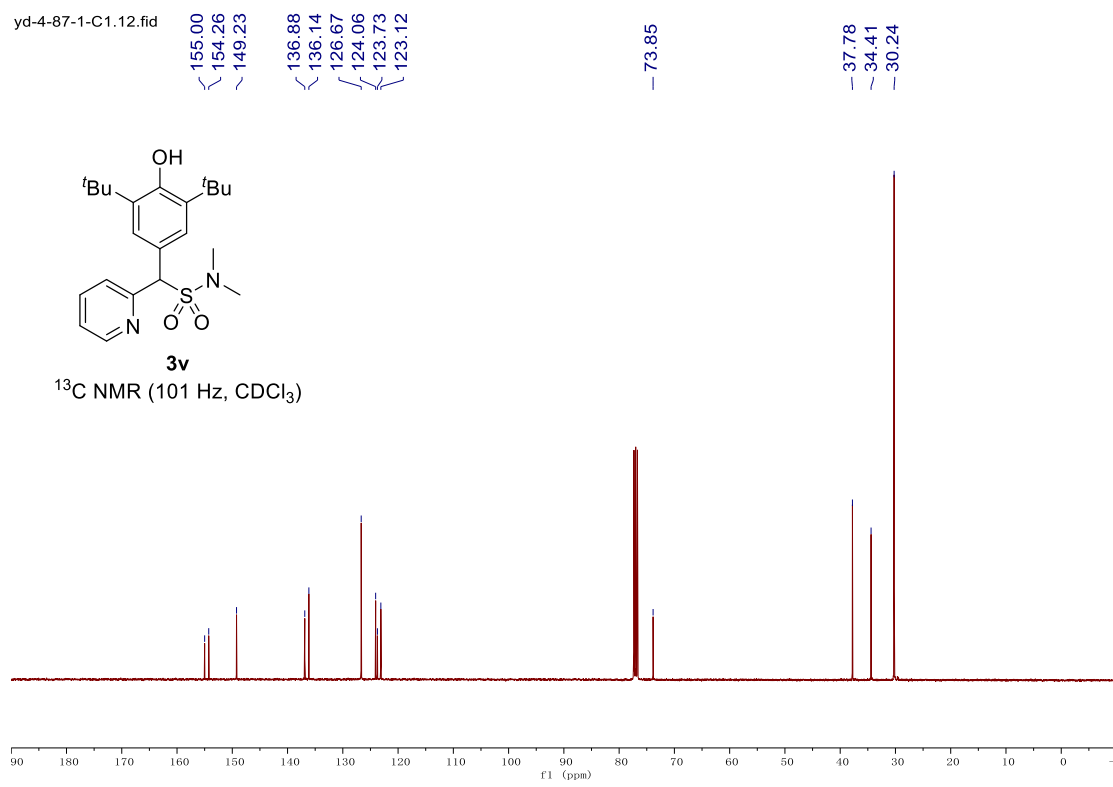

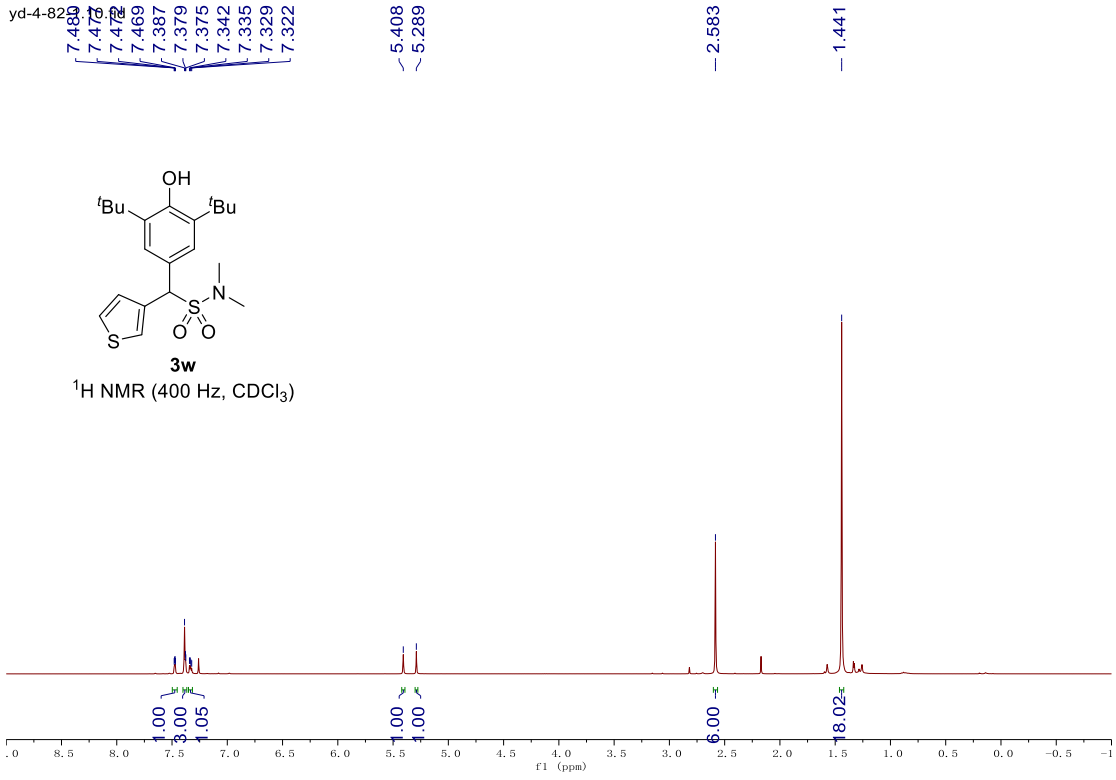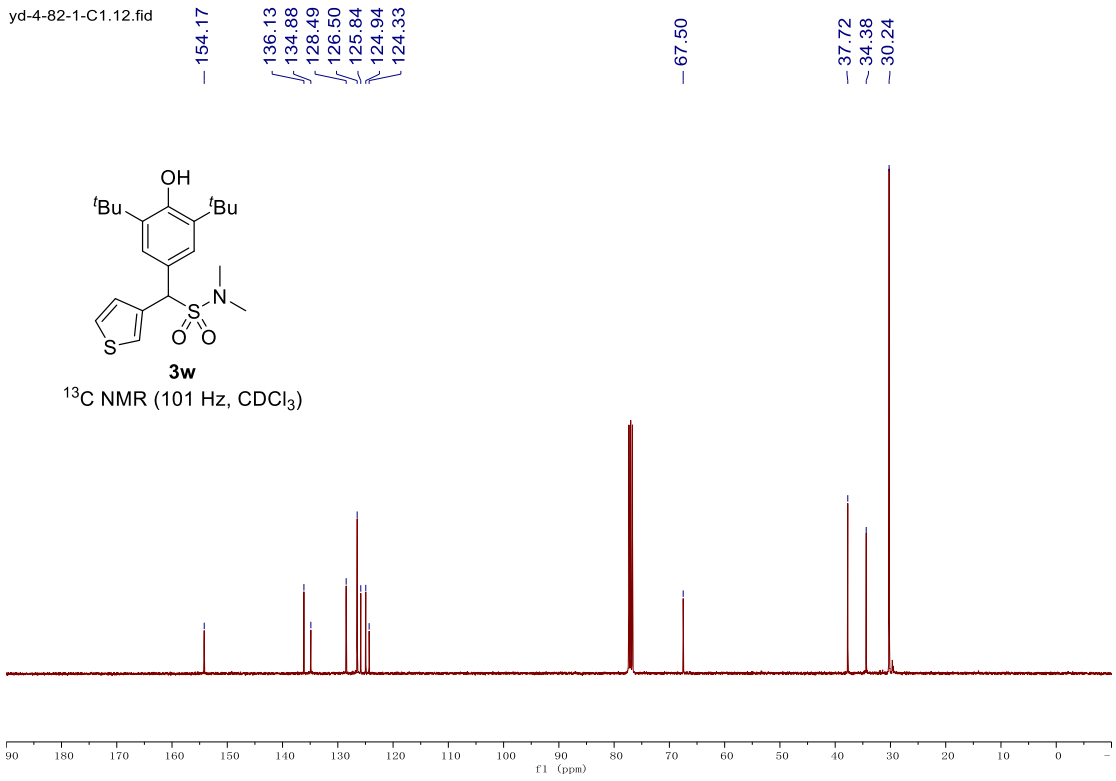

yd-4-87-3

7.461  
7.479  
7.478  
7.394  
7.381  
7.377  
7.341  
7.334  
7.329  
7.321

5.413  
5.292

2.586

1.445

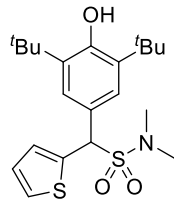

**3x**

<sup>1</sup>H NMR (400 Hz, CDCl<sub>3</sub>)

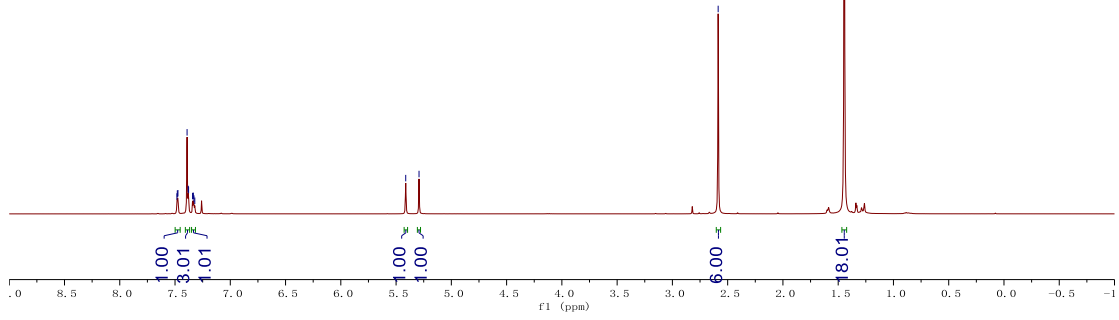

yd-4-87-3-C2.12.fid

154.18  
136.15  
134.90  
128.50  
126.51  
125.84  
124.95  
124.36

67.54

37.73  
34.39  
30.26

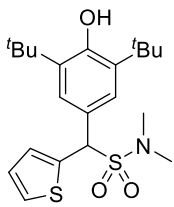

**3x**

<sup>13</sup>C NMR (101 Hz, CDCl<sub>3</sub>)

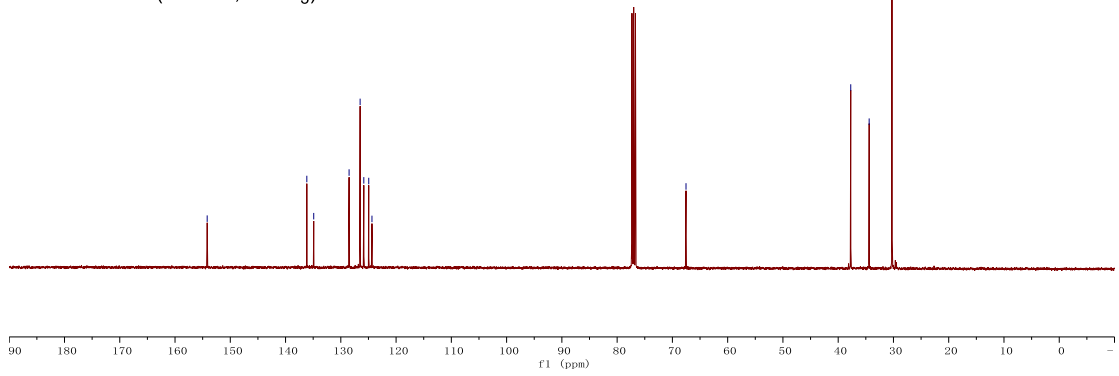

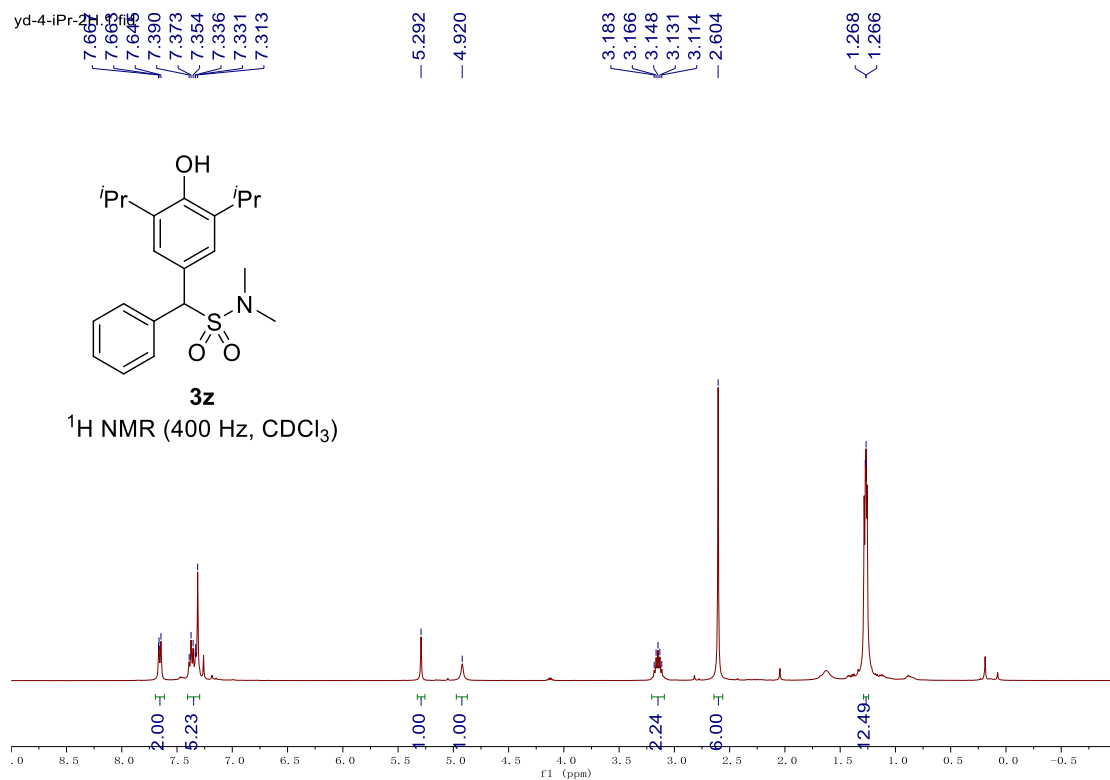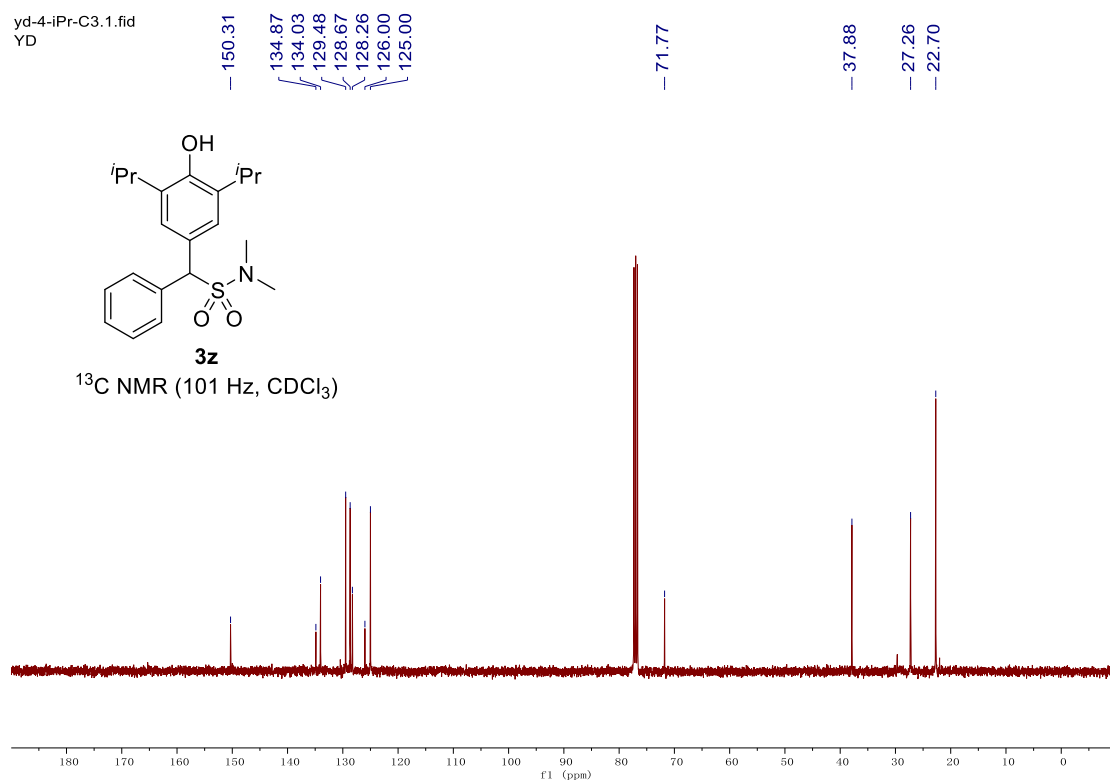

yd-4-75-8-H1.10.fid

7.421  
6.841  
6.835  
6.417  
6.411  
6.405  
5.255  
5.062  
3.794  
3.085  
3.079  
3.067  
3.062  
3.049  
3.044  
3.031  
3.026  
1.437  
1.014  
0.996  
0.978

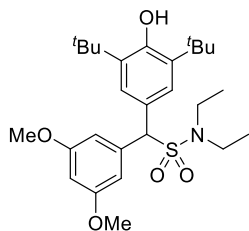

**4a**

<sup>1</sup>H NMR (400 Hz, CDCl<sub>3</sub>)

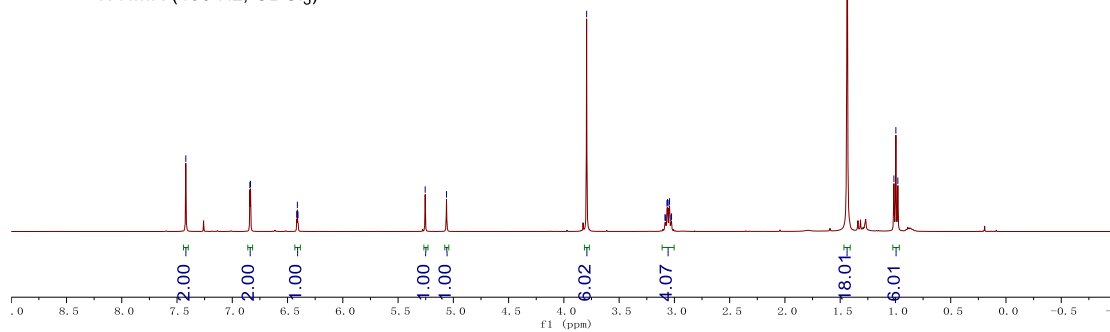

yd-4-75-8-C1.12.fid

160.67  
153.93  
137.41  
135.88  
126.38  
125.11  
107.67  
100.35  
73.49  
55.28  
42.25  
34.34  
30.21  
14.52

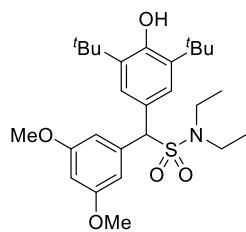

**4a**

<sup>13</sup>C NMR (101 Hz, CDCl<sub>3</sub>)

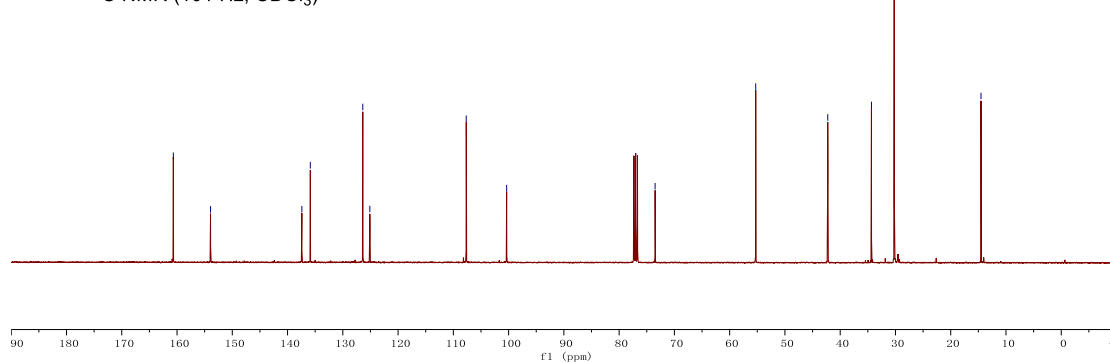

yd-4-75-2-H-1.10.fid

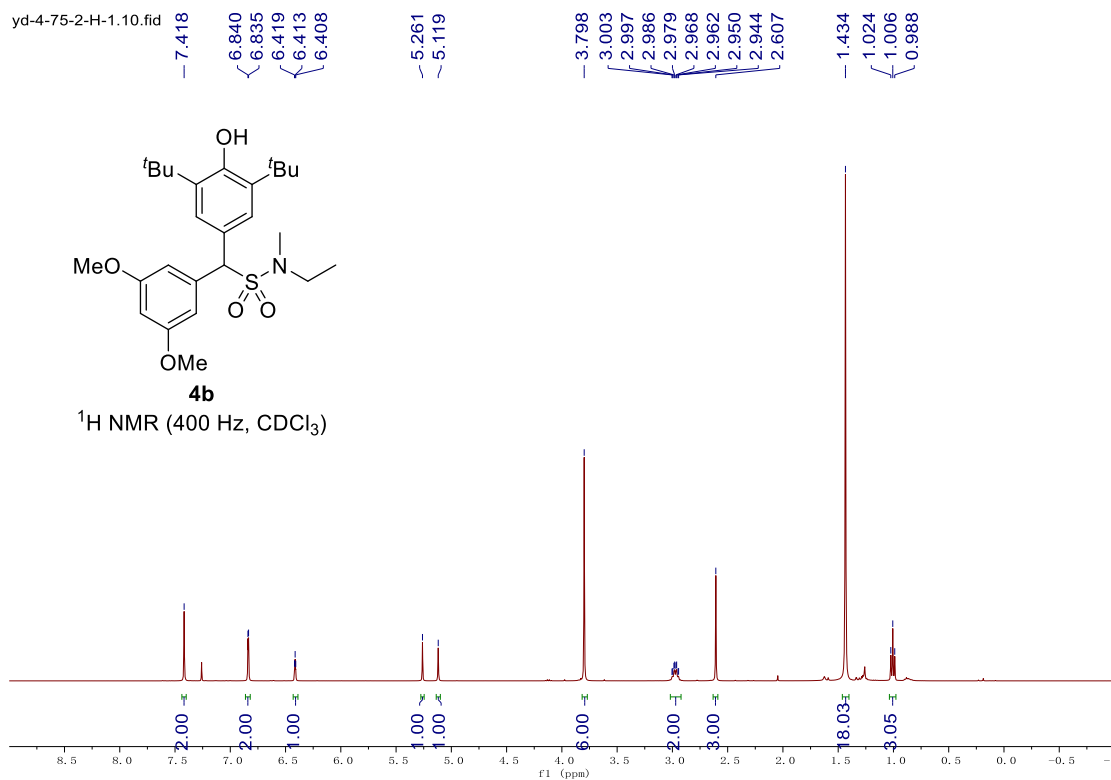

yd-4-75-2-C-1.12.fid

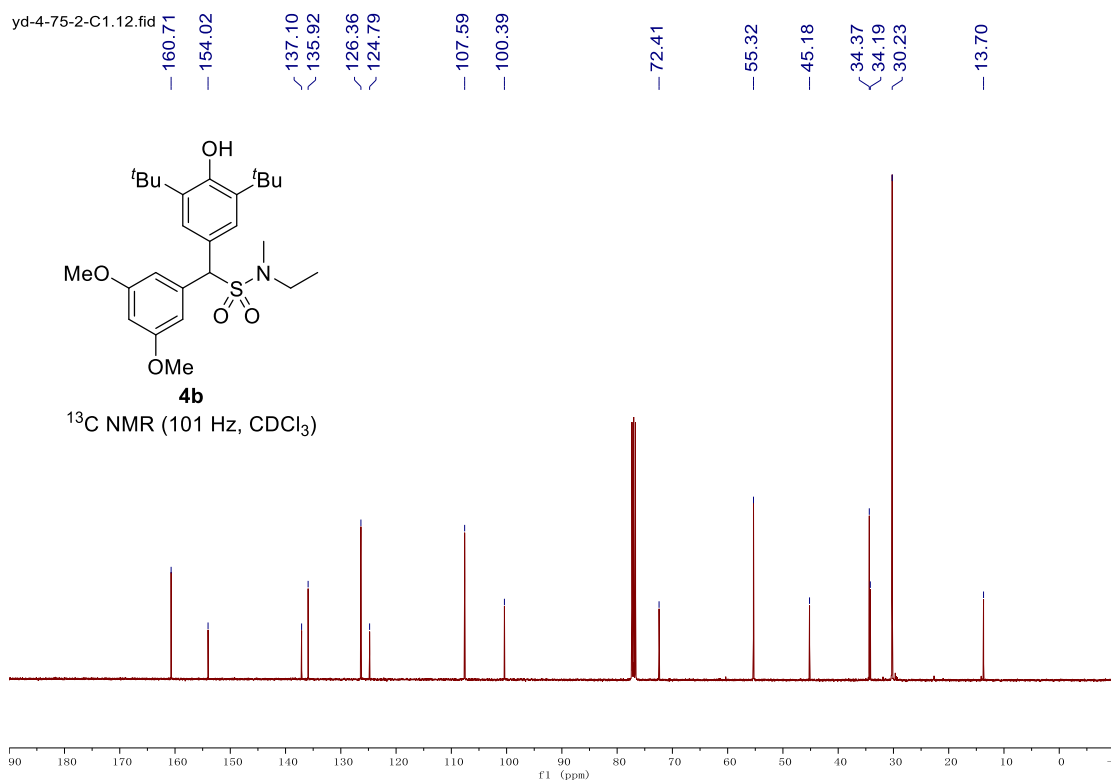



yd-4-75-4-H1.10.fid

7.436  
6.860  
6.854  
6.419  
6.414  
6.408  
5.260  
5.225  
3.798  
3.170  
3.168  
3.159  
3.154  
3.147  
3.132  
3.115  
3.088  
3.071  
3.056  
3.048  
3.034  
1.715  
1.712  
1.698  
1.684  
1.671  
1.659  
1.655  
1.642  
1.639  
1.433

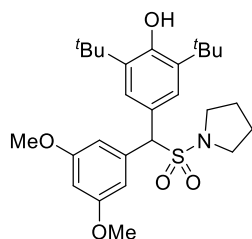

**4c**  
 $^1\text{H NMR}$  (400 Hz,  $\text{CDCl}_3$ )

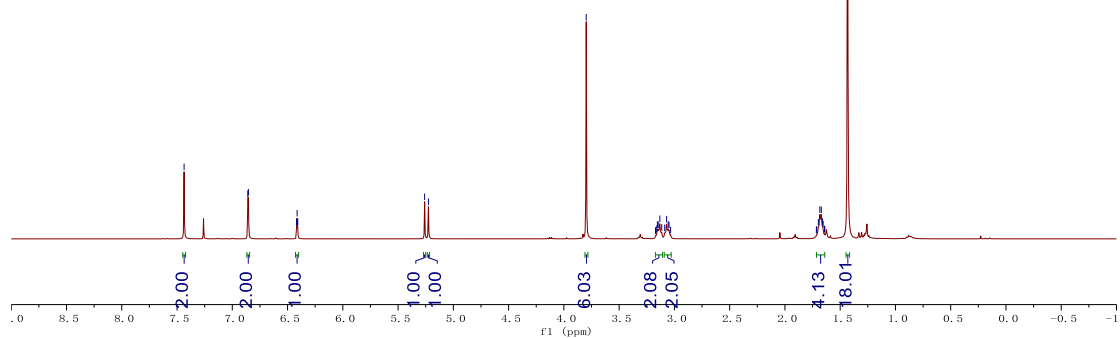

yd-4-75-4-C1.12.fid

160.68  
154.02  
137.19  
135.86  
126.40  
124.90  
107.60  
100.39  
71.74  
55.33  
48.27  
34.37  
30.22  
25.78

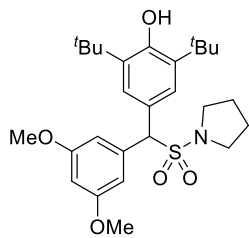

**4c**  
 $^{13}\text{C NMR}$  (101 Hz,  $\text{CDCl}_3$ )

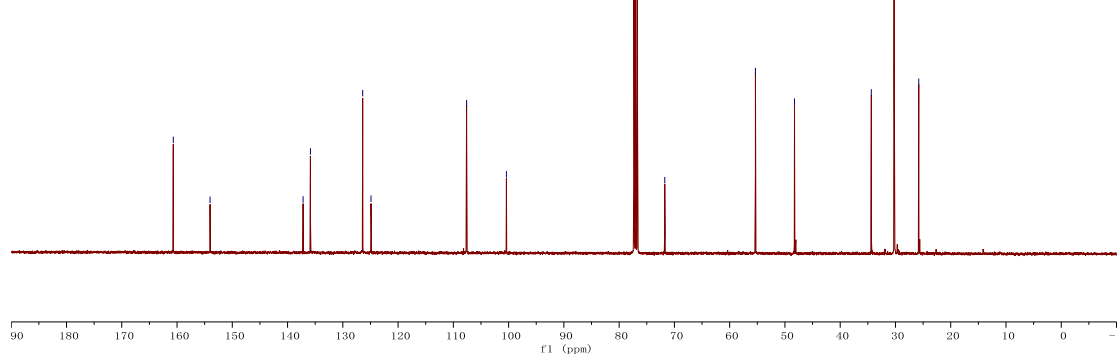

yd-4-74-7-H1.10.fid

7.422  
6.841  
6.835  
6.419  
6.414  
6.408  
5.256  
5.076  
3.798  
3.040  
3.007  
2.996  
2.971  
2.955  
2.937  
2.926  
1.437  
1.410  
1.394  
1.384  
1.372  
1.362  
1.332  
1.324  
1.308

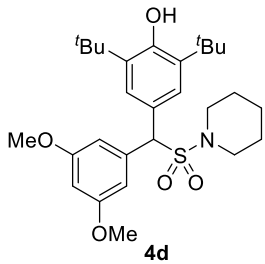

<sup>1</sup>H NMR (400 Hz, CDCl<sub>3</sub>)

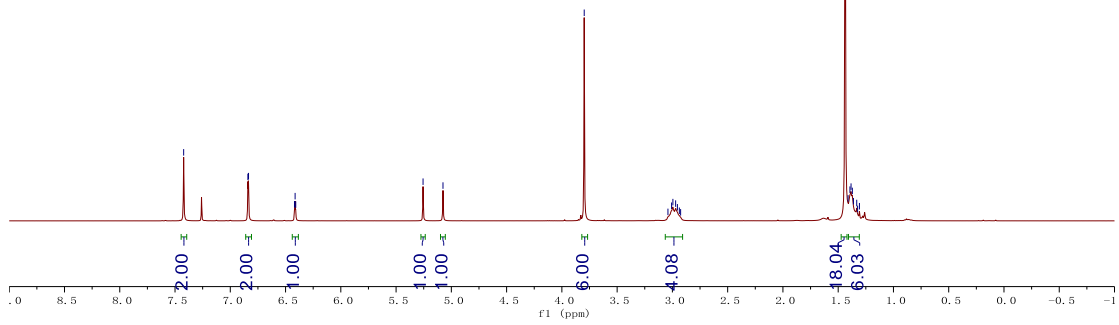

yd-4-74-7-C1.12.fid

160.71  
154.06  
137.06  
135.95  
126.49  
124.82  
107.66  
100.44  
72.61  
55.35  
47.06  
34.40  
30.26  
25.74  
23.80

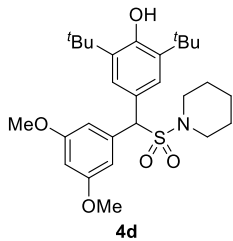

<sup>13</sup>C NMR (101 Hz, CDCl<sub>3</sub>)

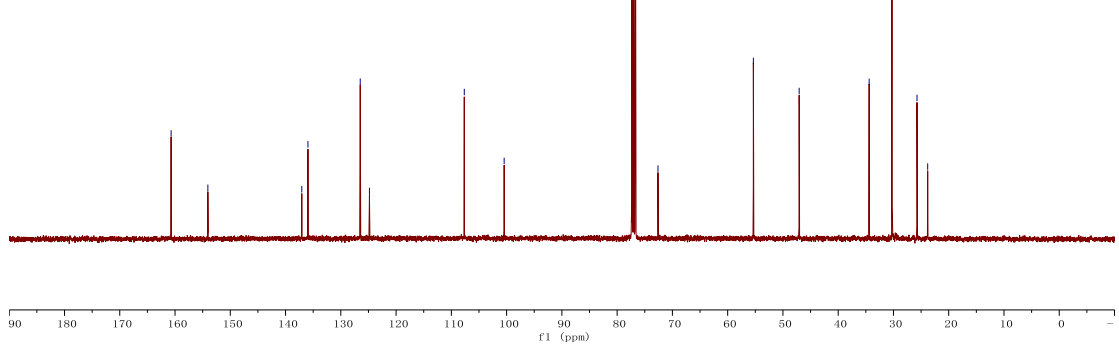

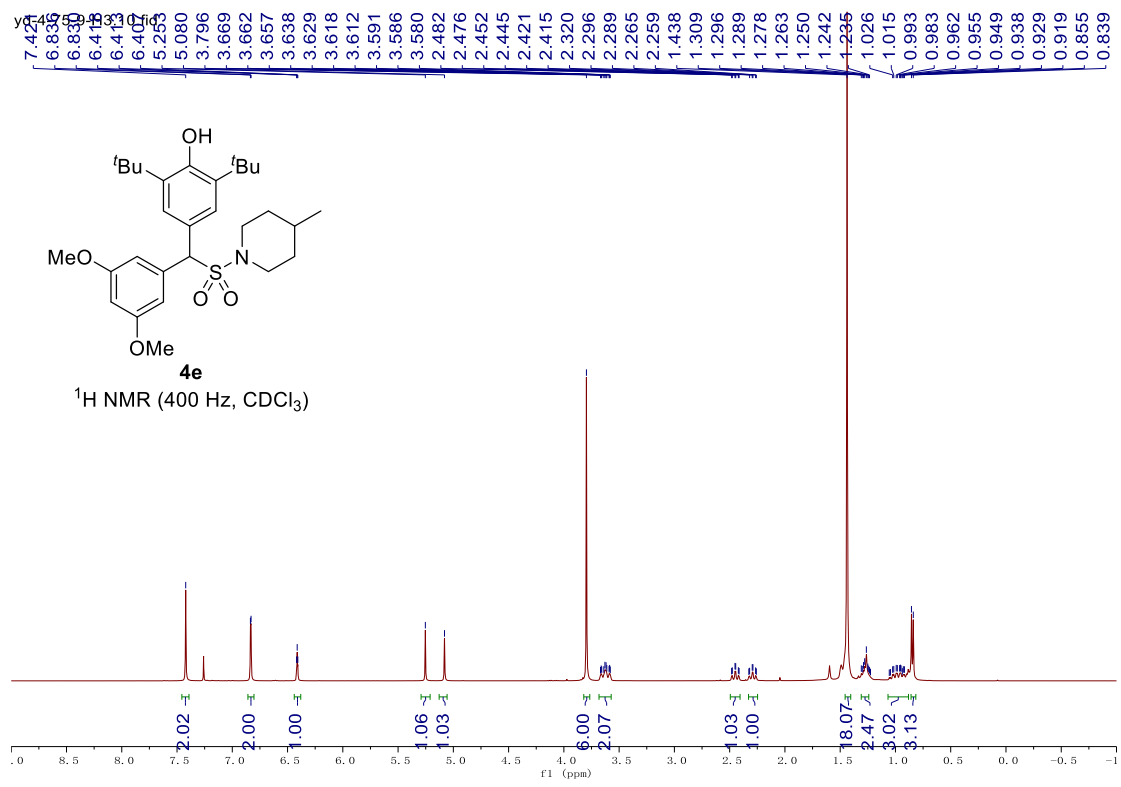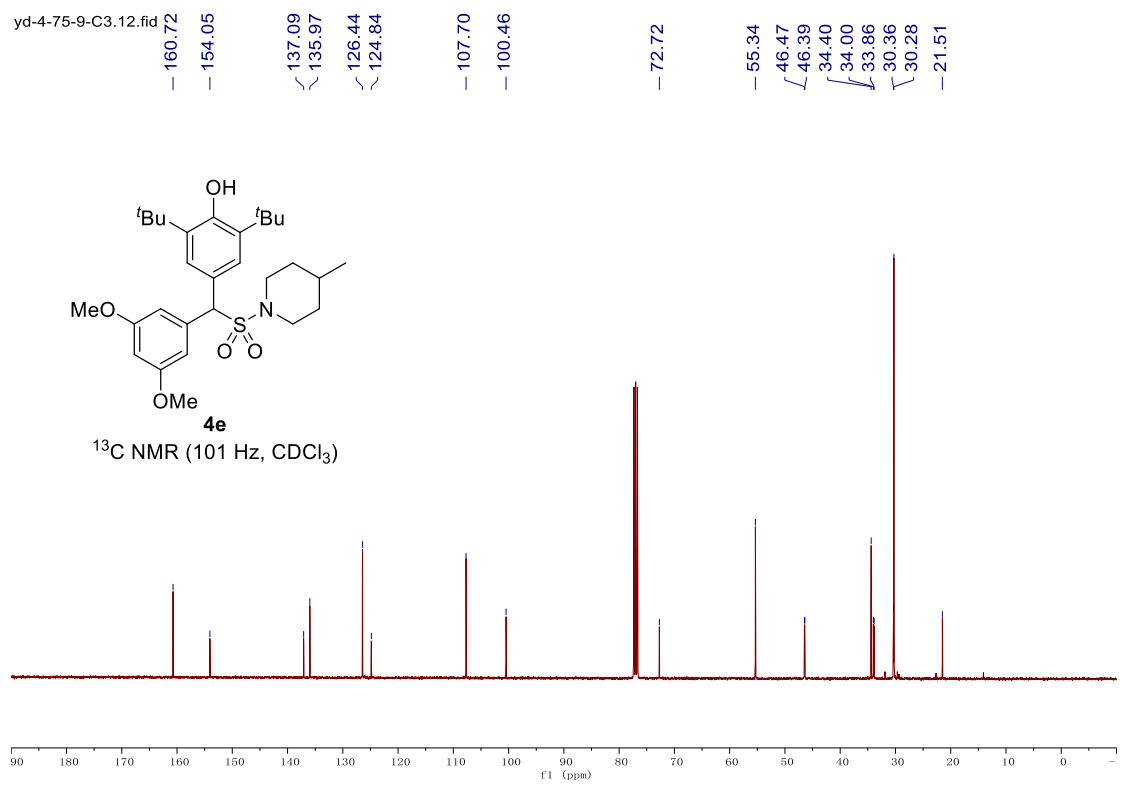

yd-4-74-6-H1.10.fid

7.422  
6.829  
6.823  
6.433  
6.427  
6.422  
5.289  
5.100  
3.801  
3.533  
3.521  
3.508  
3.496  
3.038  
3.026  
3.016  
3.010  
1.438

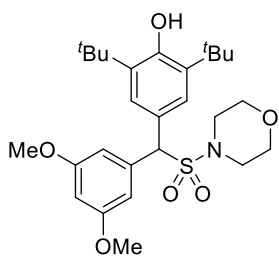

**4f**

<sup>1</sup>H NMR (400 Hz, CDCl<sub>3</sub>)

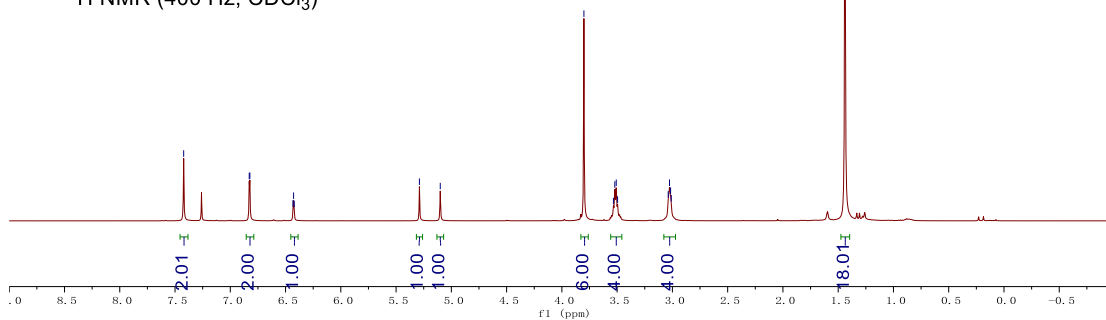

yd-4-74-6-C1.12.fid

160.83  
154.22  
136.51  
136.12  
126.41  
124.27  
107.67  
100.49  
72.75  
66.76  
55.36  
46.36  
34.42  
30.24

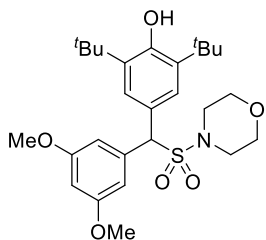

**4f**

<sup>13</sup>C NMR (101 Hz, CDCl<sub>3</sub>)

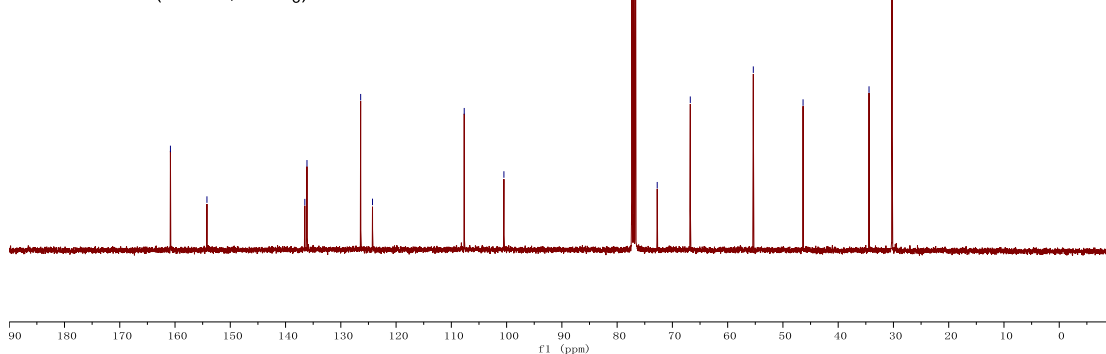

Supplement: d4cc02571g1.pdf [file d4cc02571g1.pdf]
